# Supplementary material
Source: publisher figshare collection journal article supplement (https://acs.figshare.com/ndownloader/files/12404408)
Supplement: Supplementary file 1 [file 12404408]

*Supporting Information*

**Metal-Free electrophilic Trifluoroethylthiolation with  $\text{NaSO}_2\text{CH}_2\text{CF}_3$**

Rongkang Wang<sup>‡</sup>, Lvqi Jiang<sup>‡</sup>, Wenbin Yi\*

**Table of Contents**

|                                                  |            |
|--------------------------------------------------|------------|
| <b>1. NMR Spectra of Products.....</b>           | <b>S2</b>  |
| <b>2. X-Ray Crystallographic Data of 3o.....</b> | <b>S56</b> |

## 1. NMR Spectra of Products

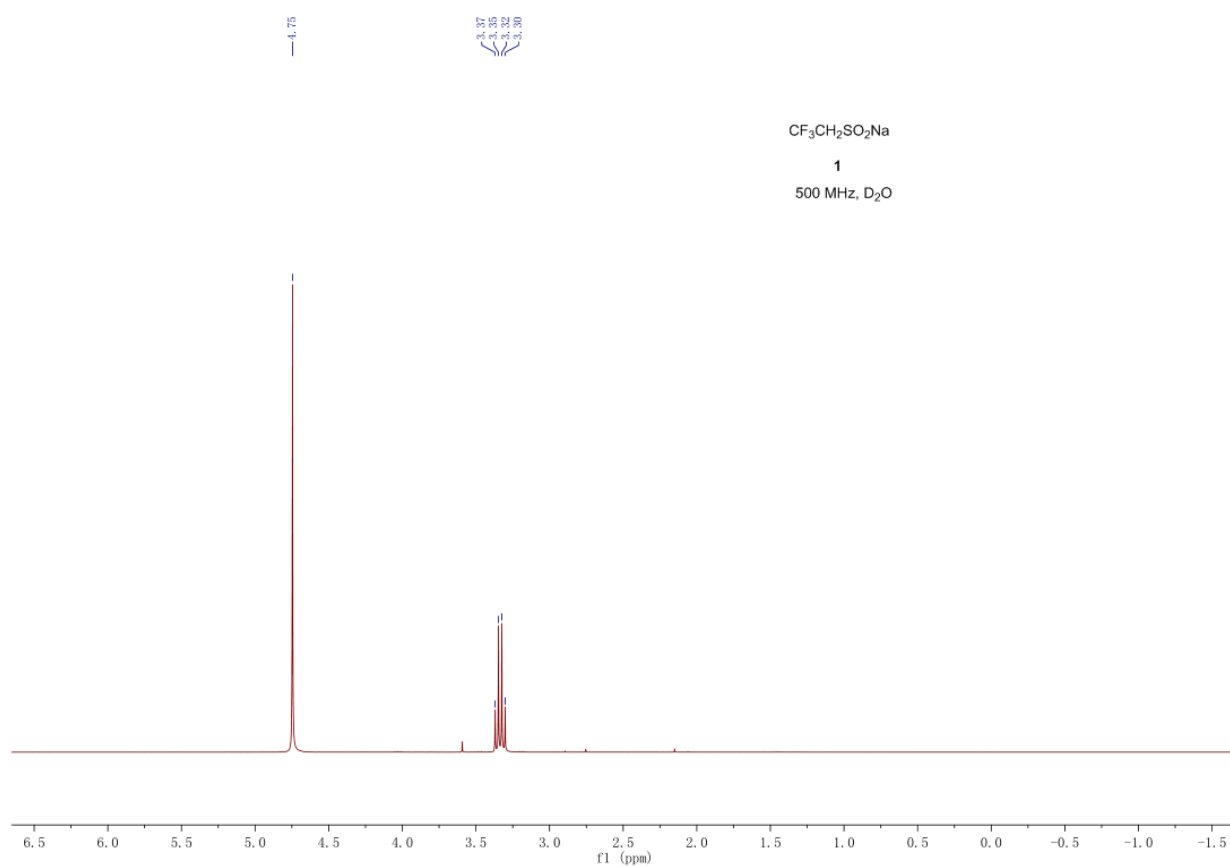

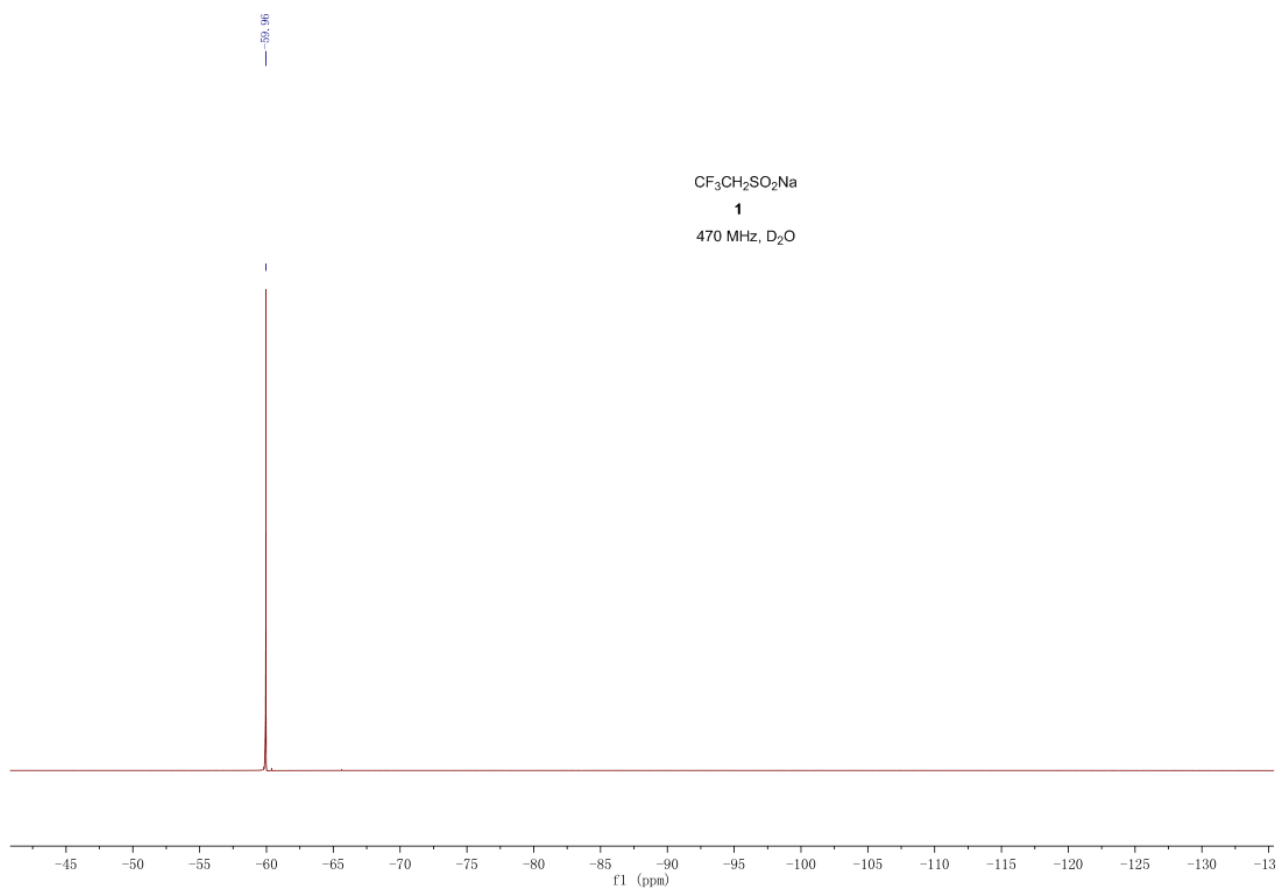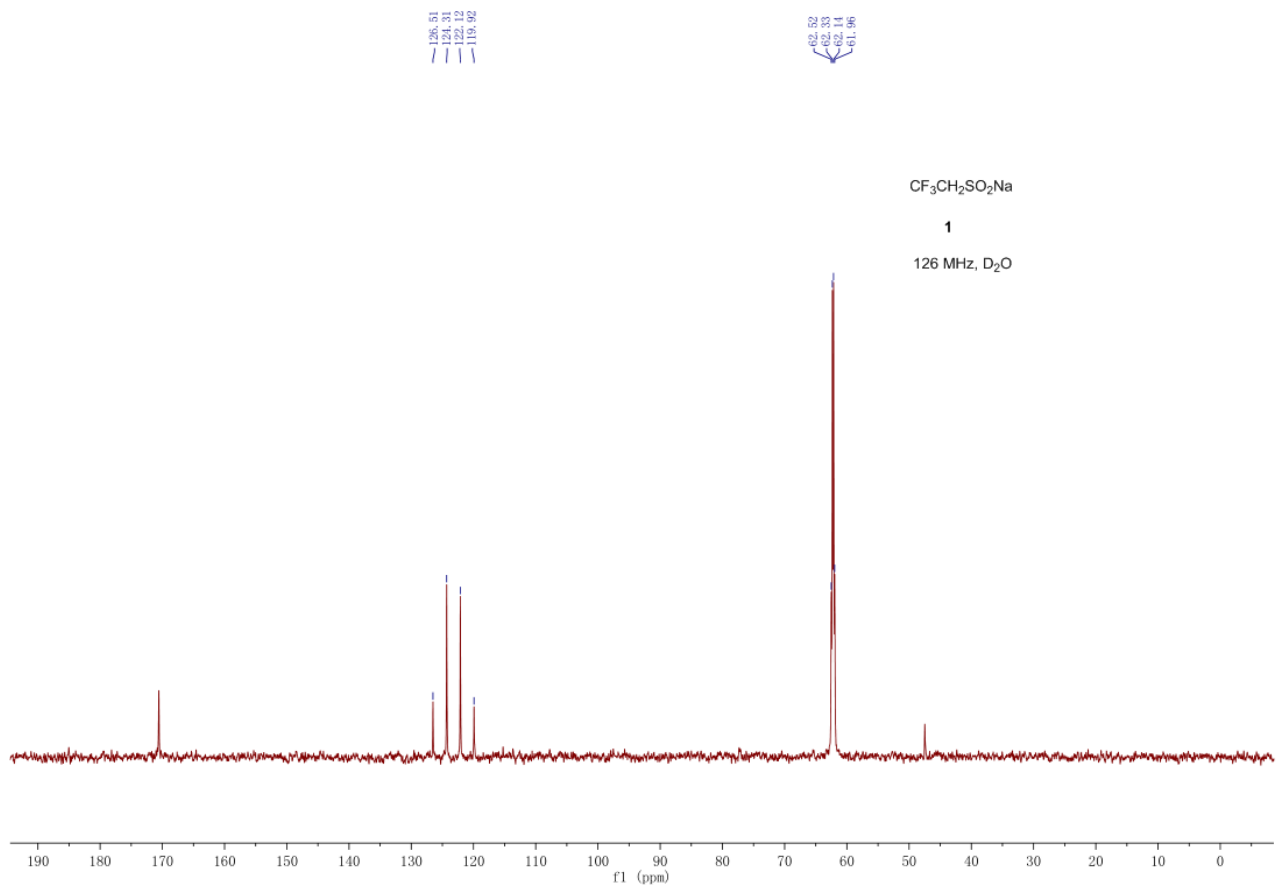

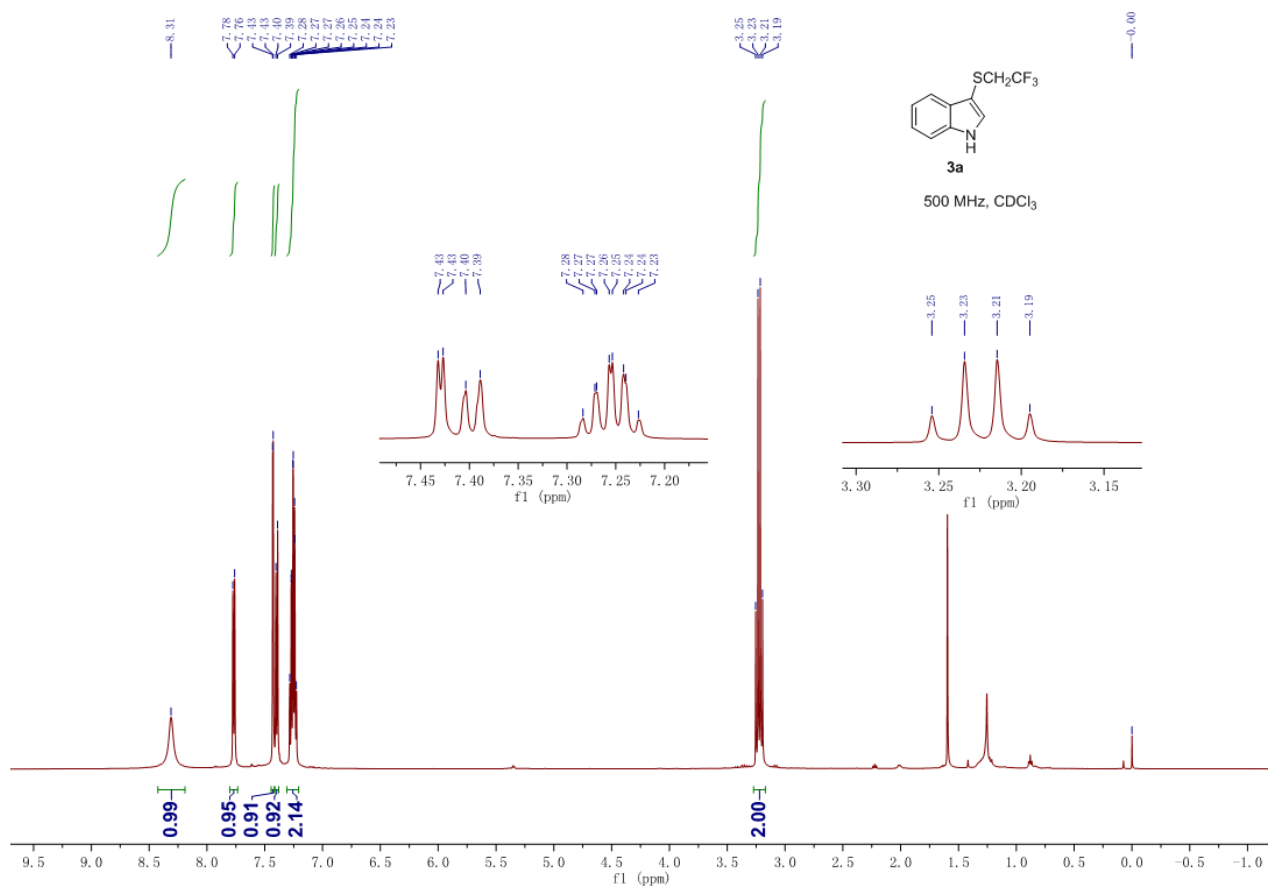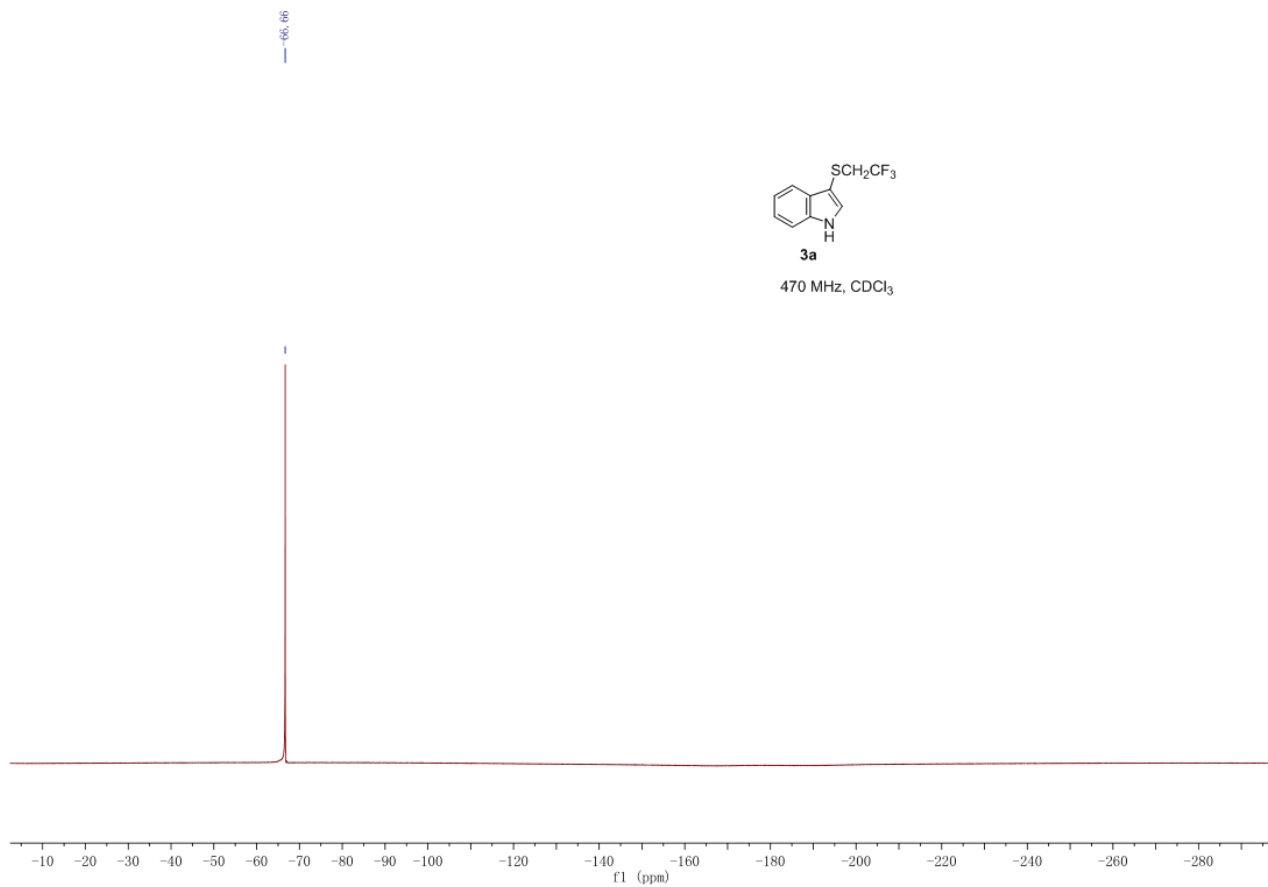

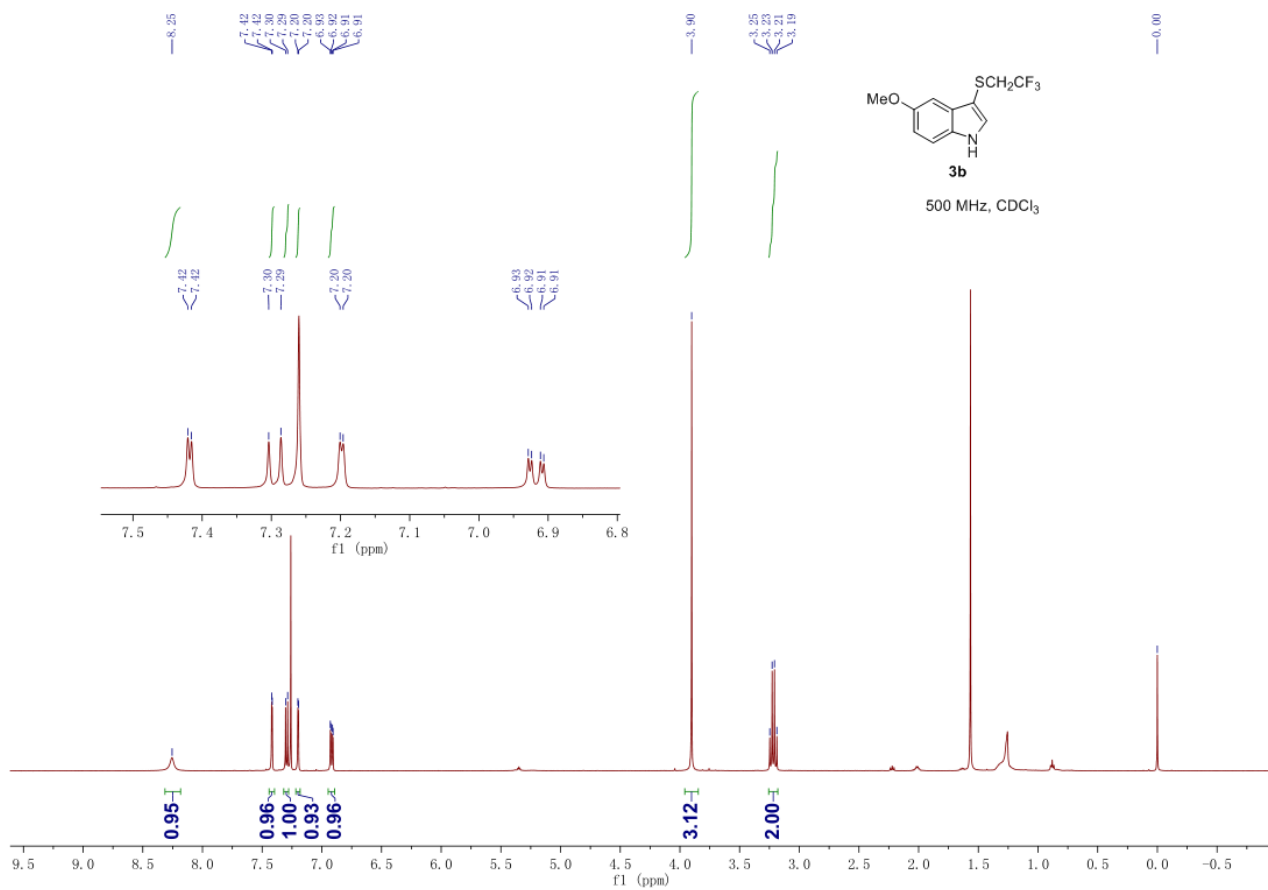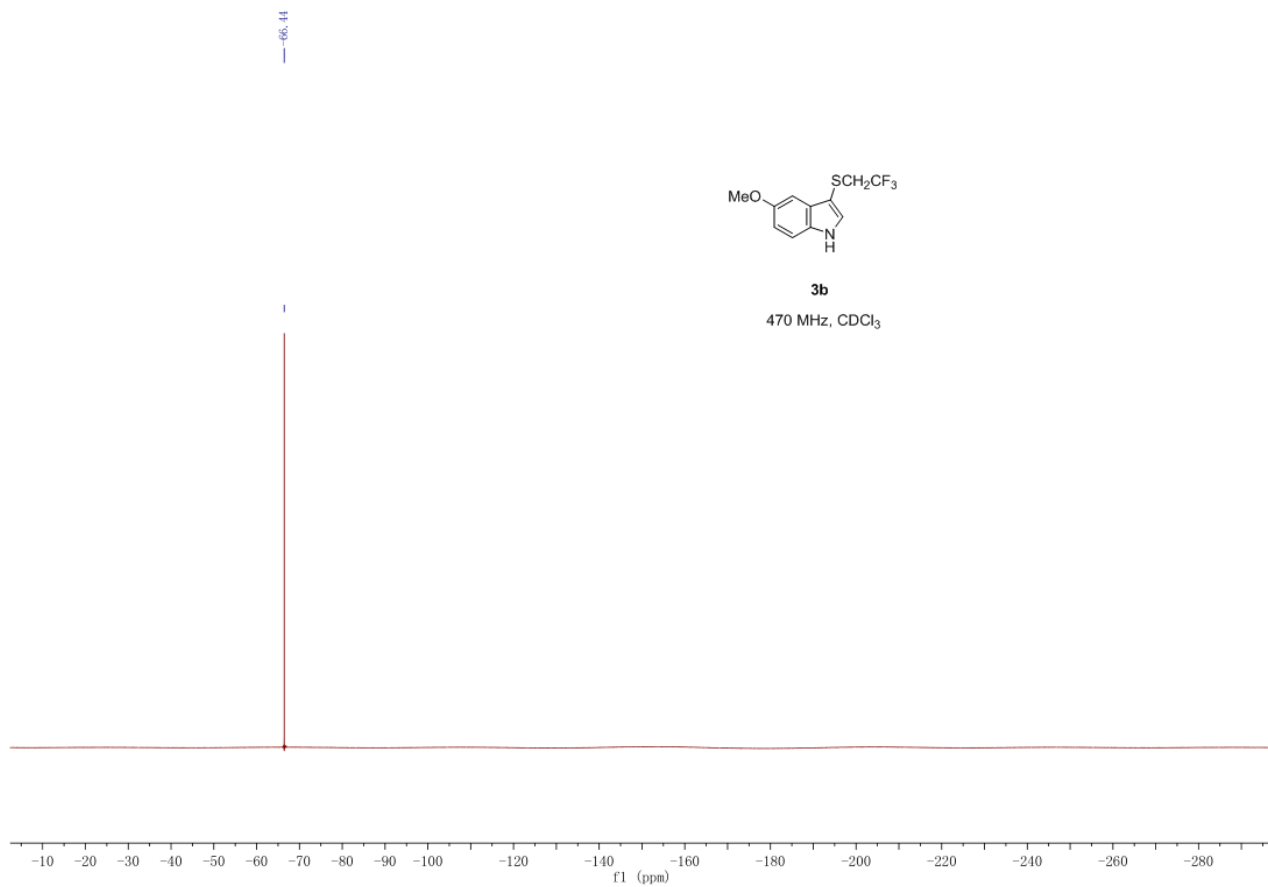

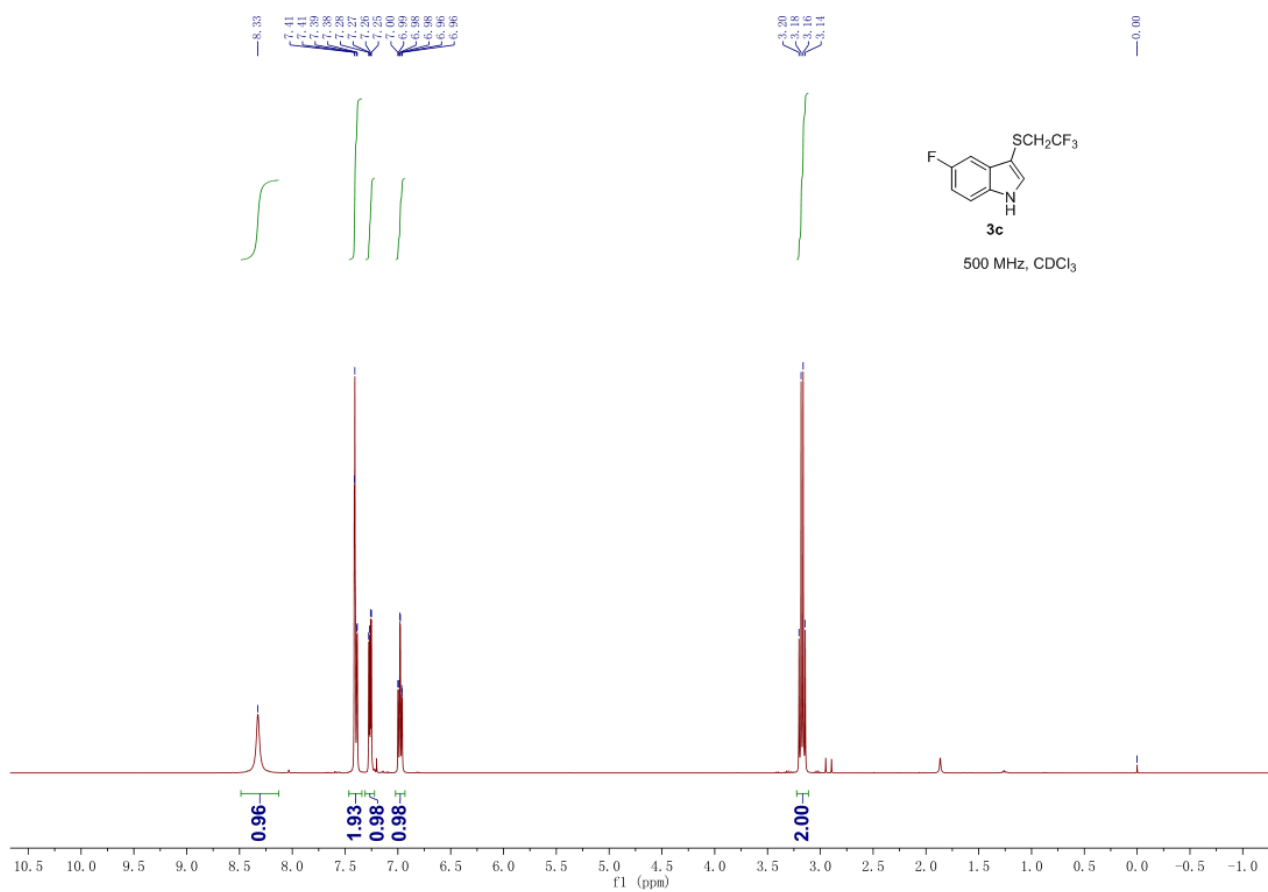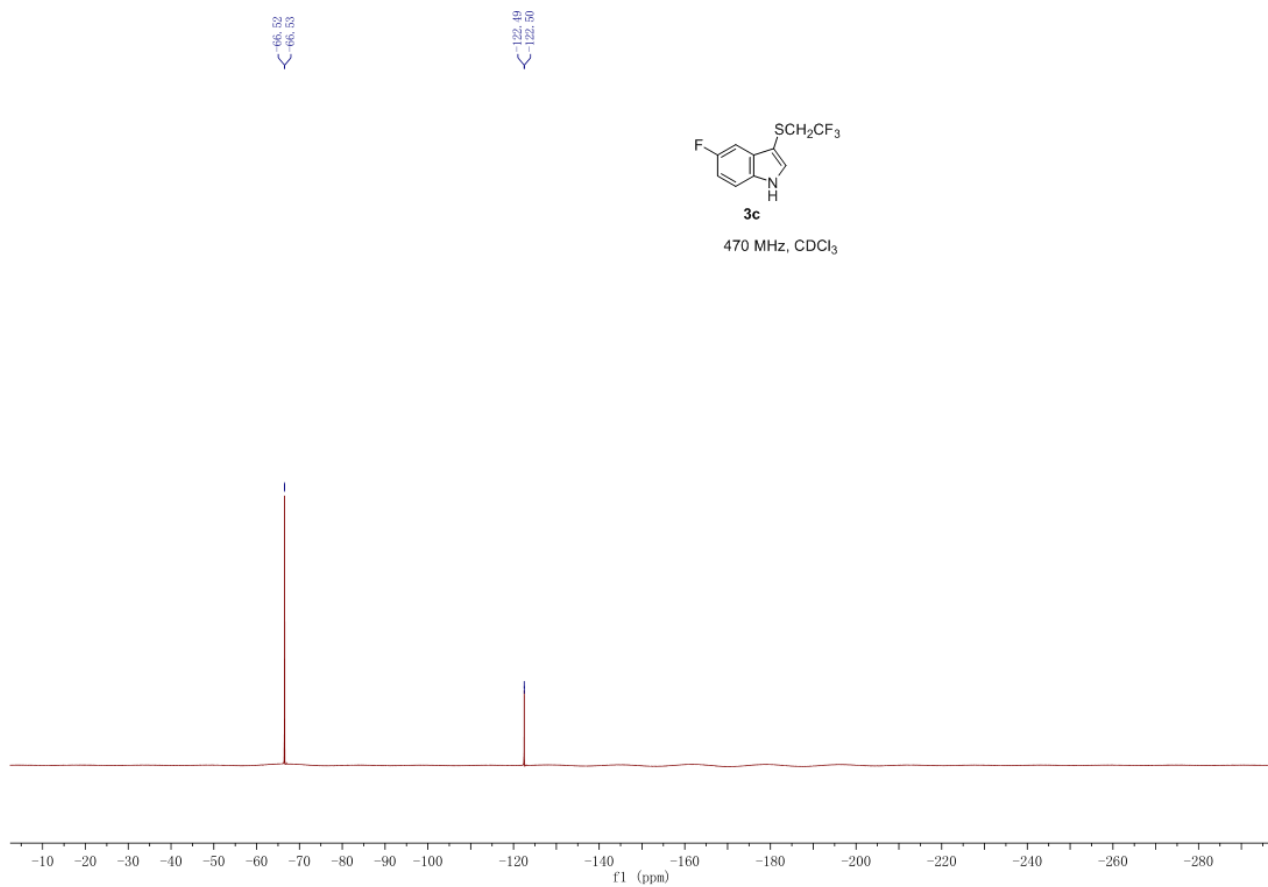

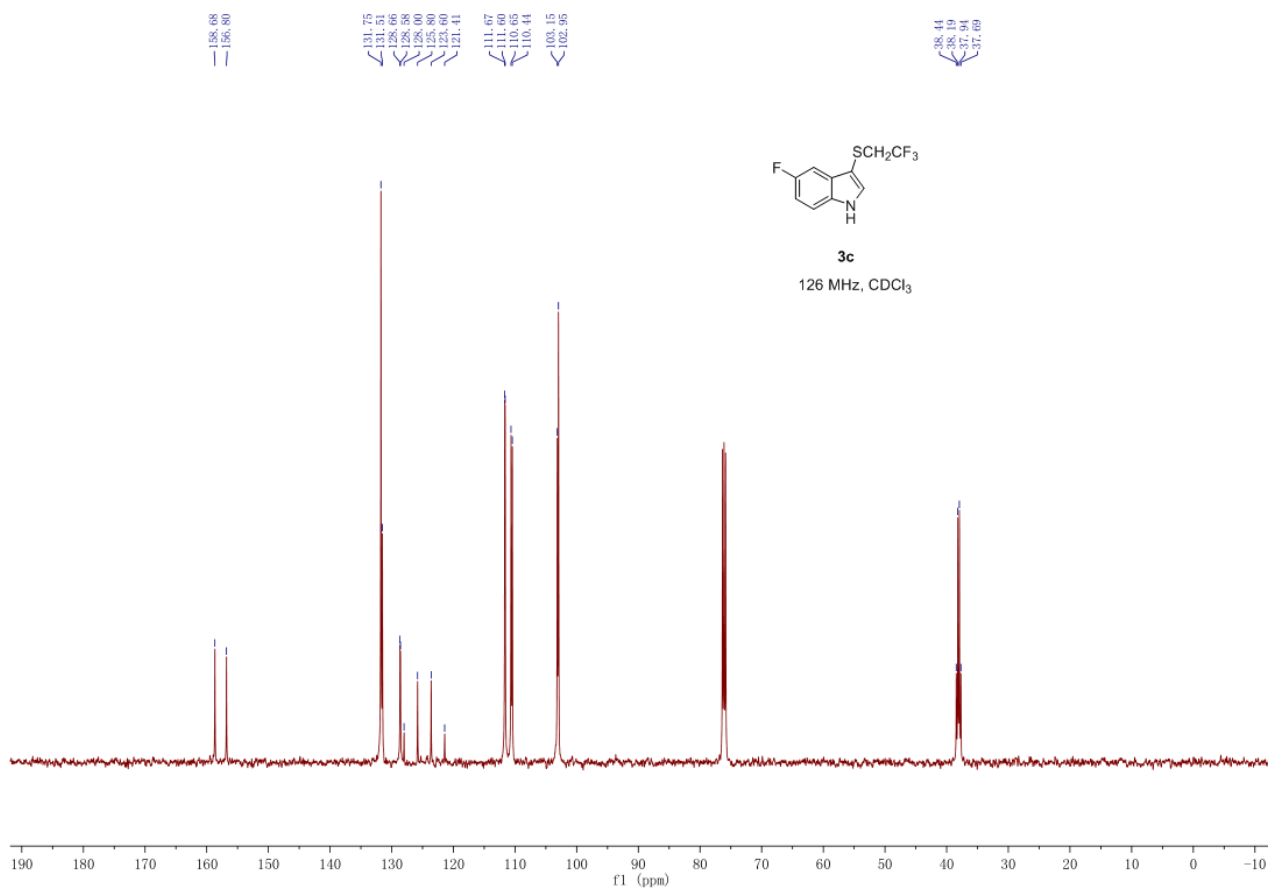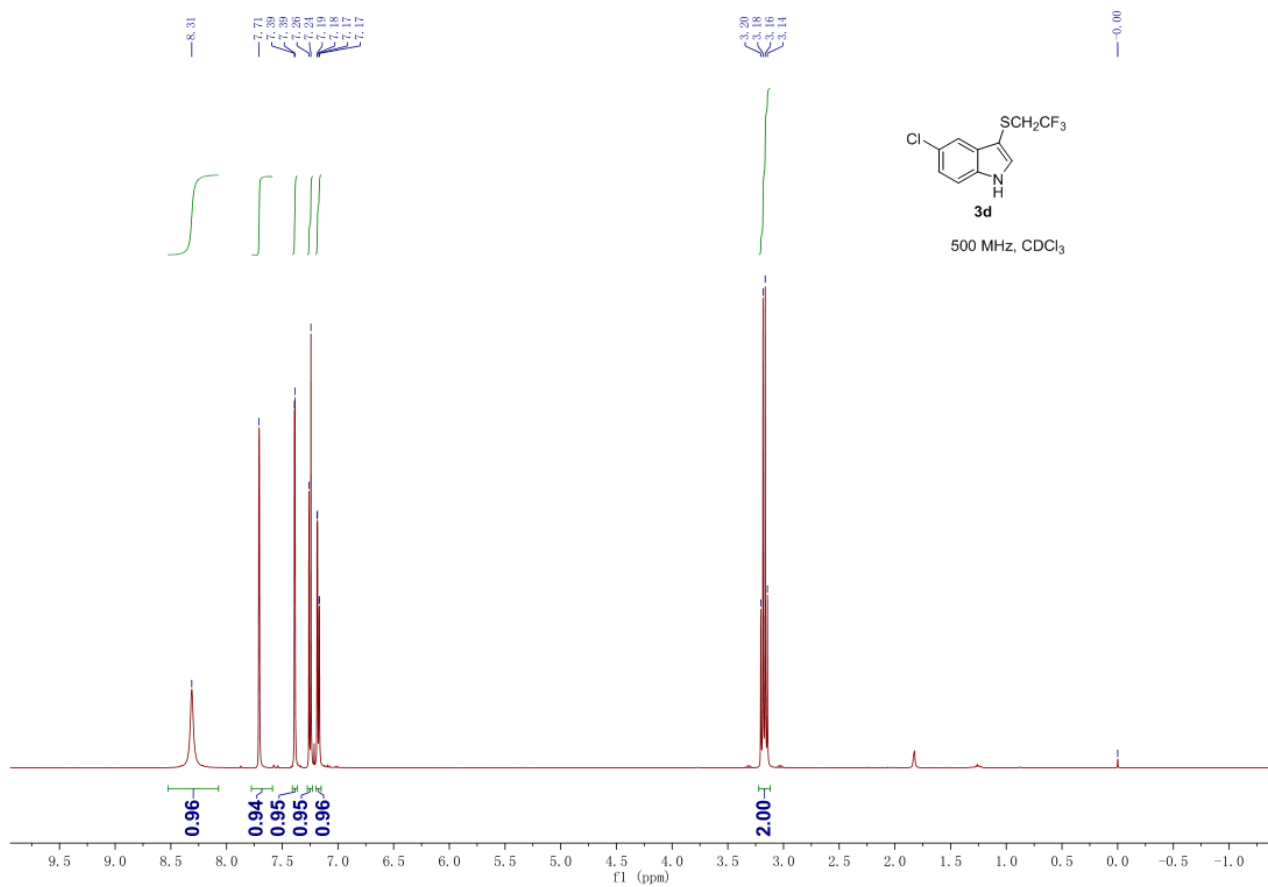

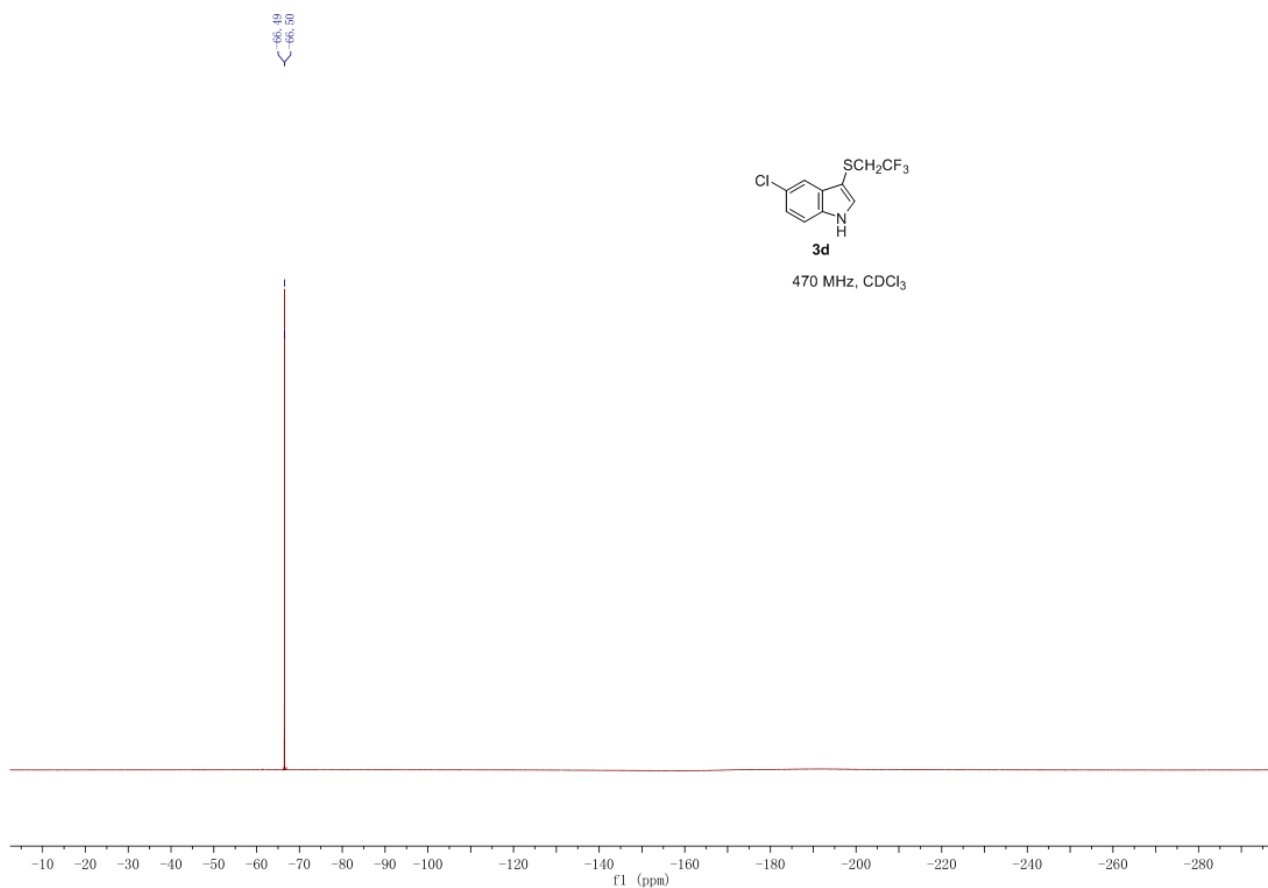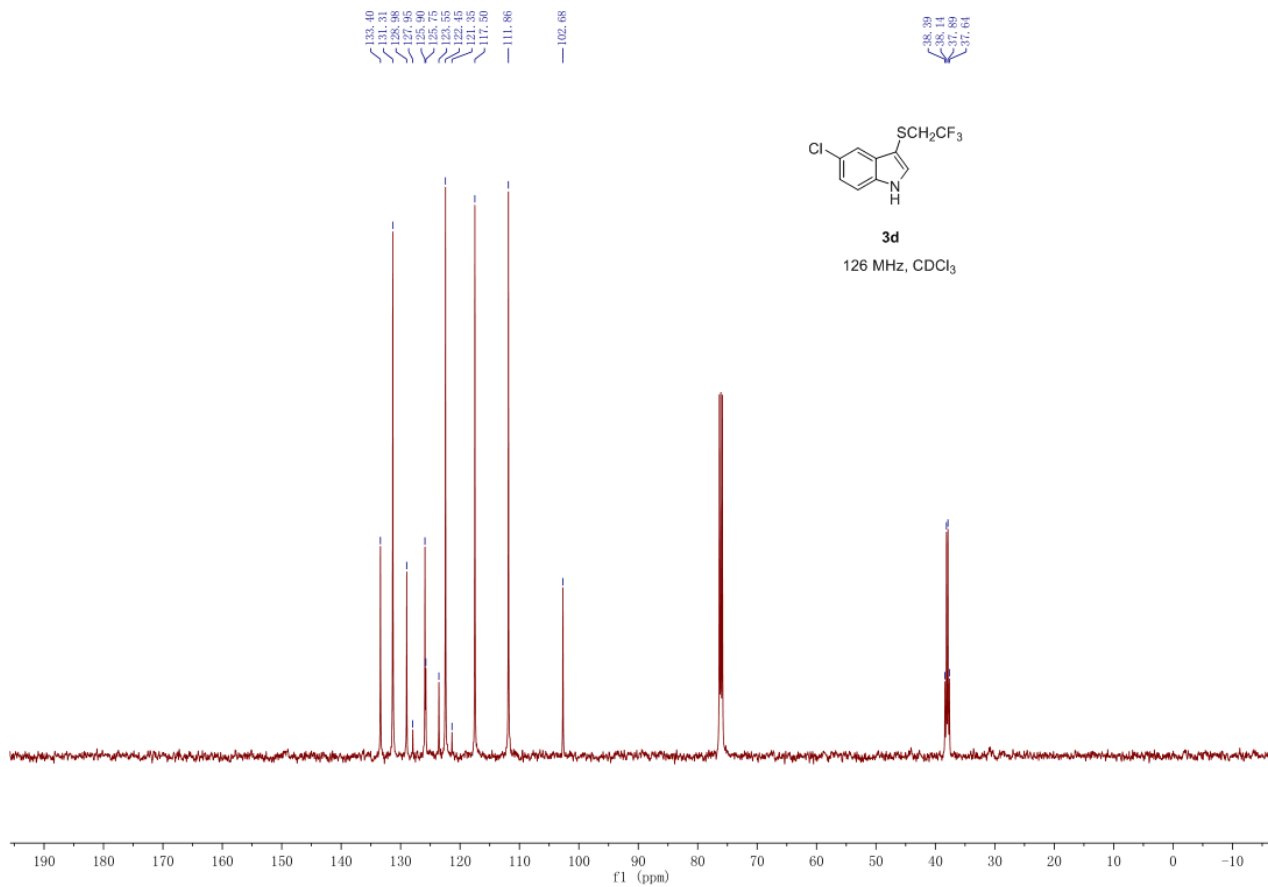



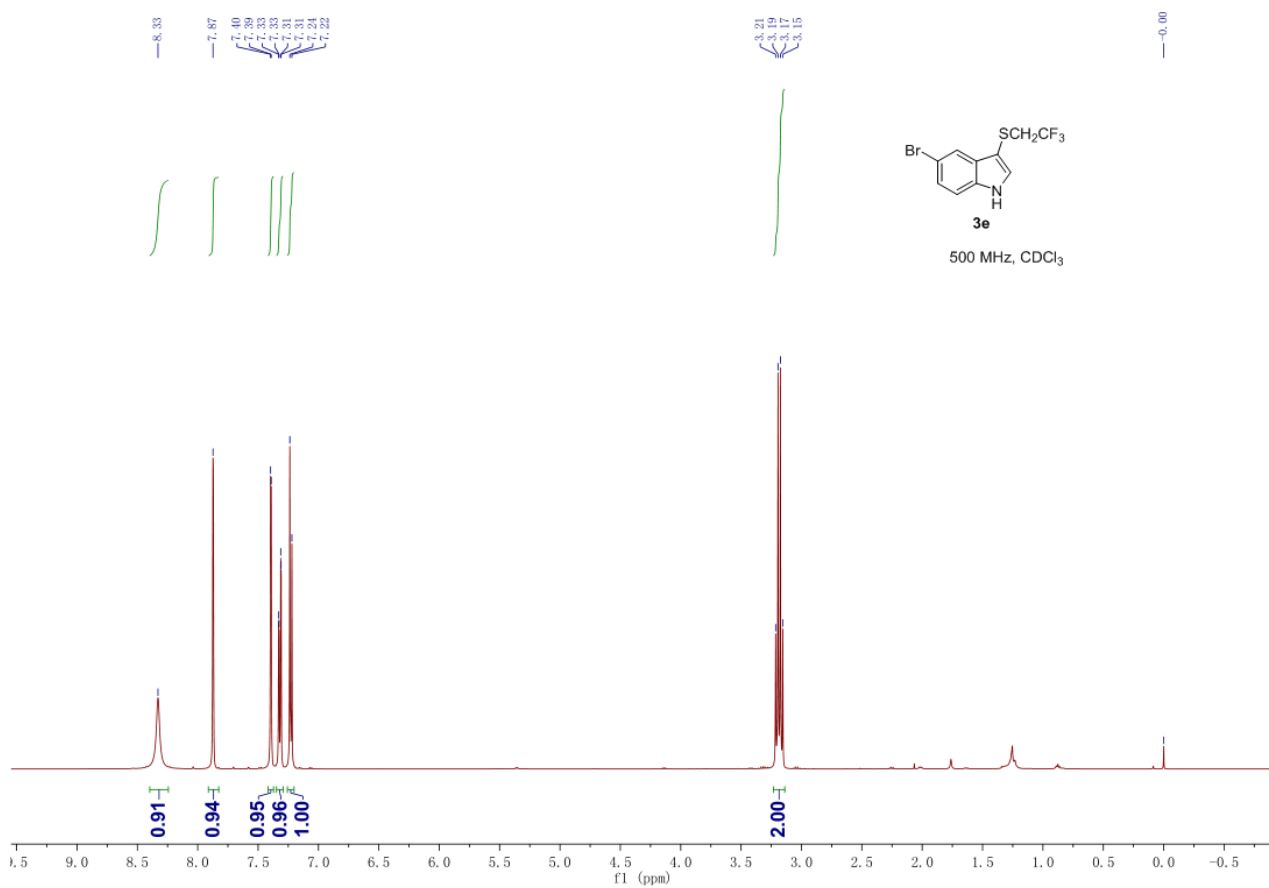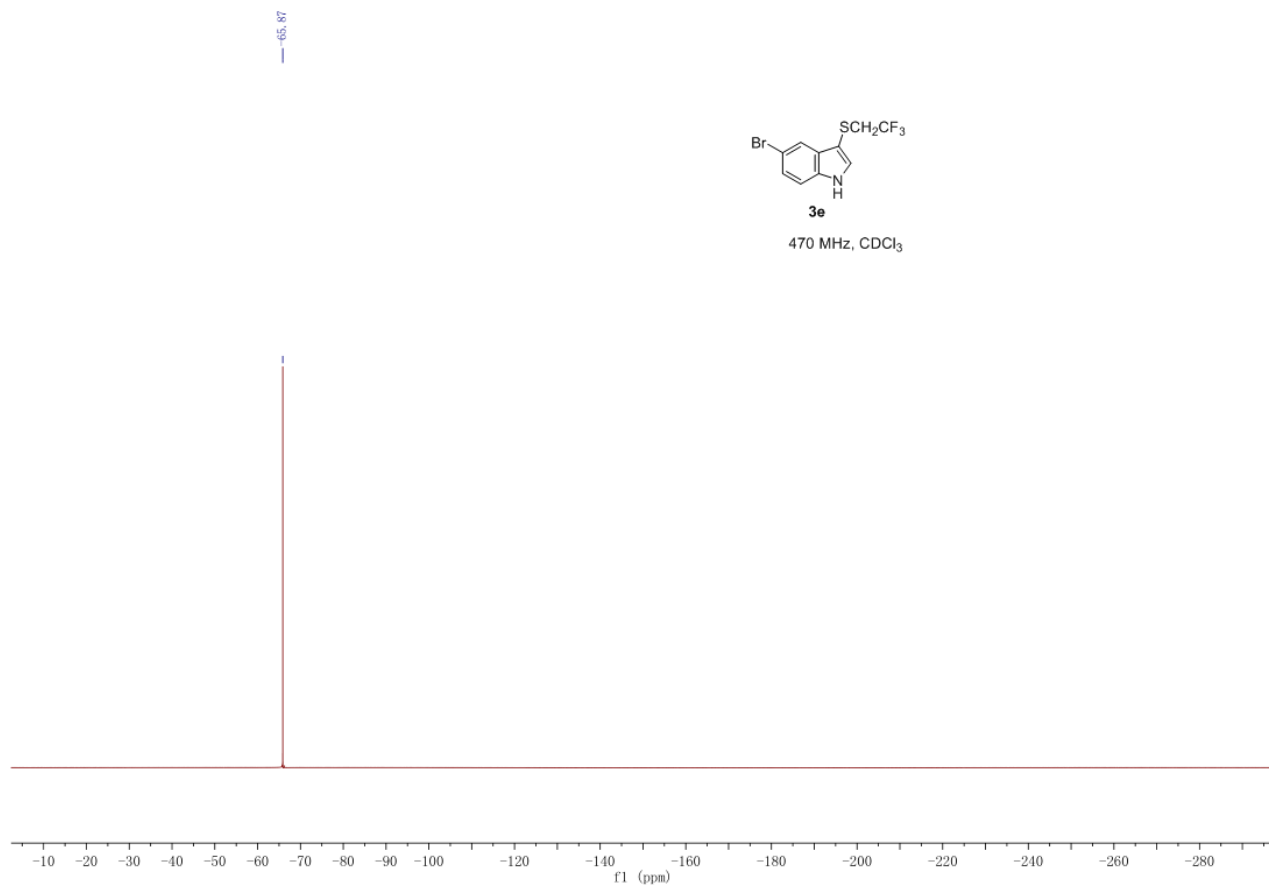

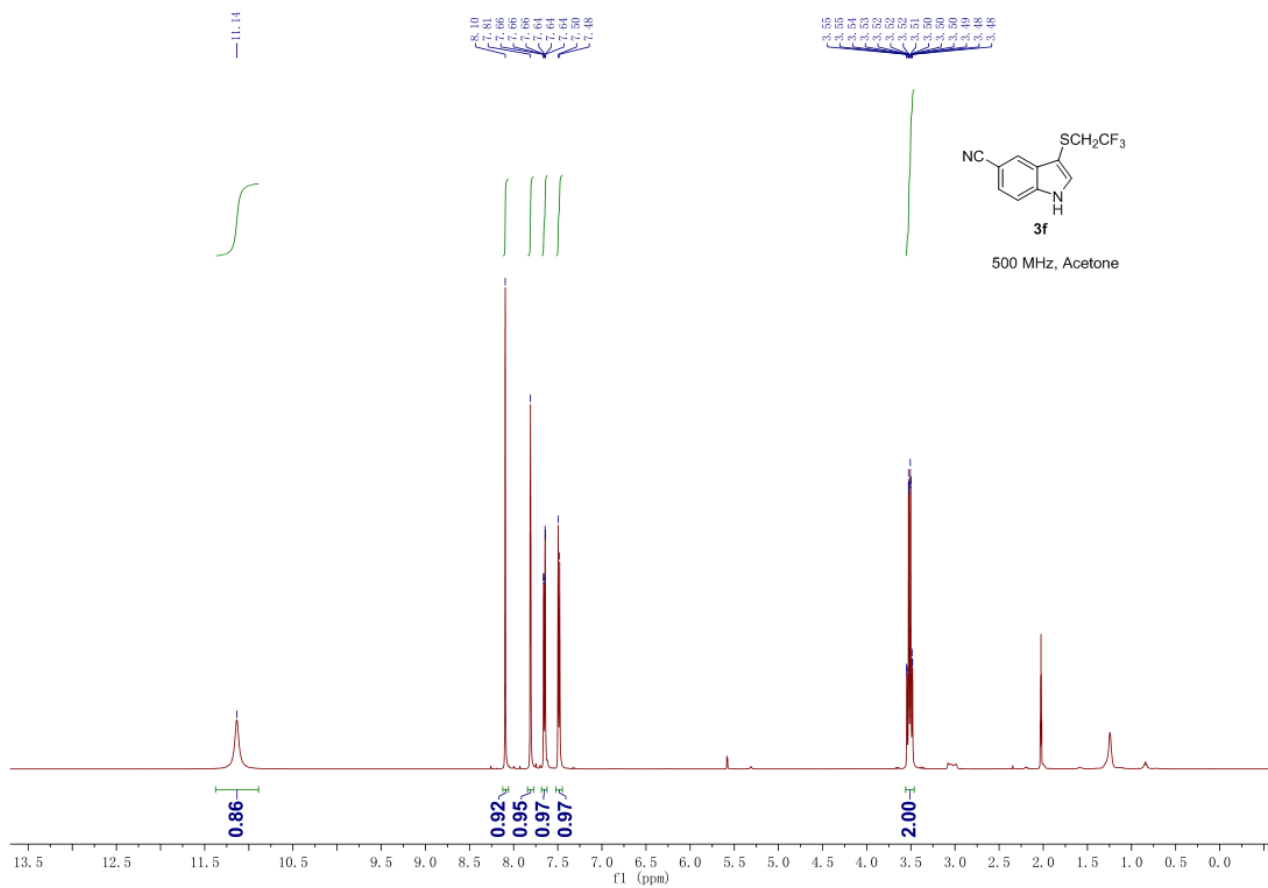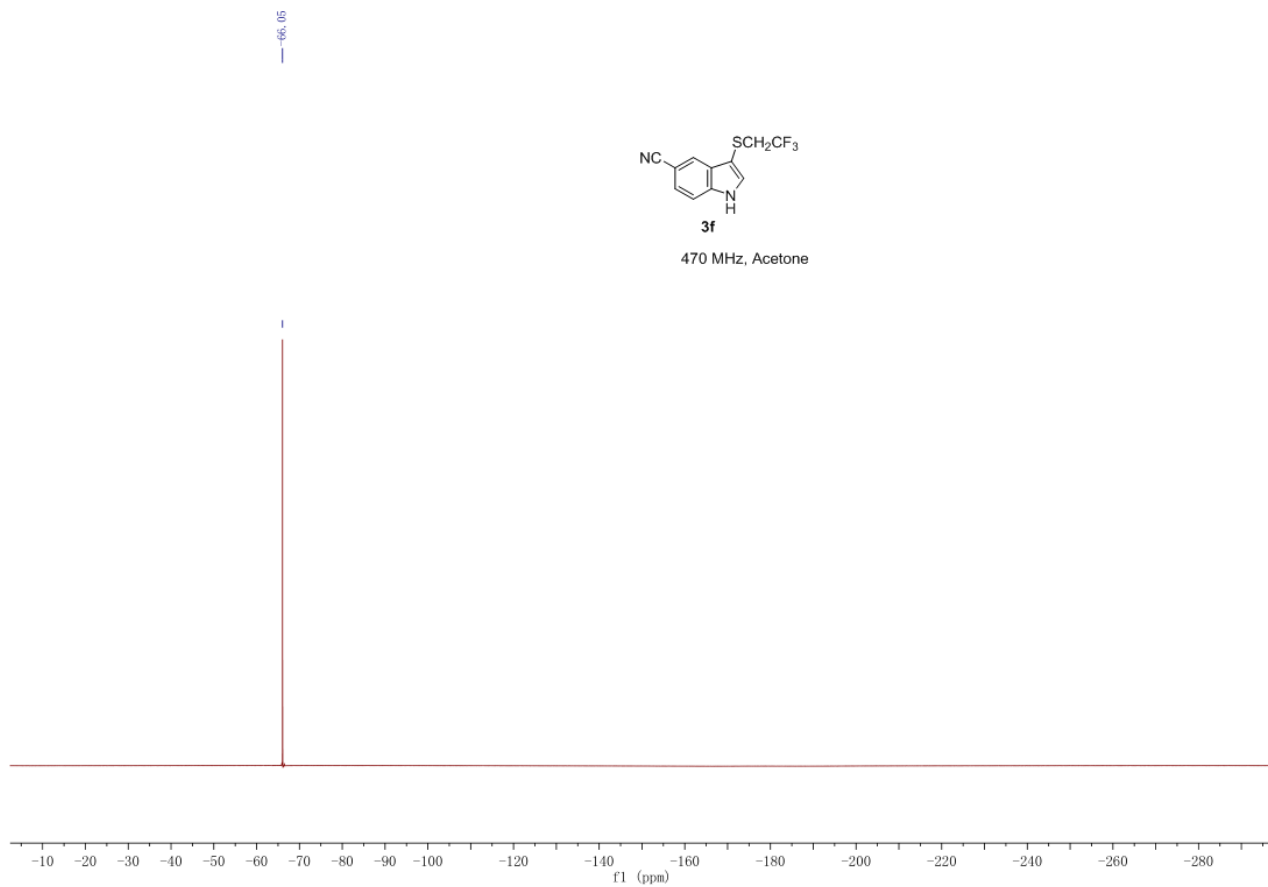



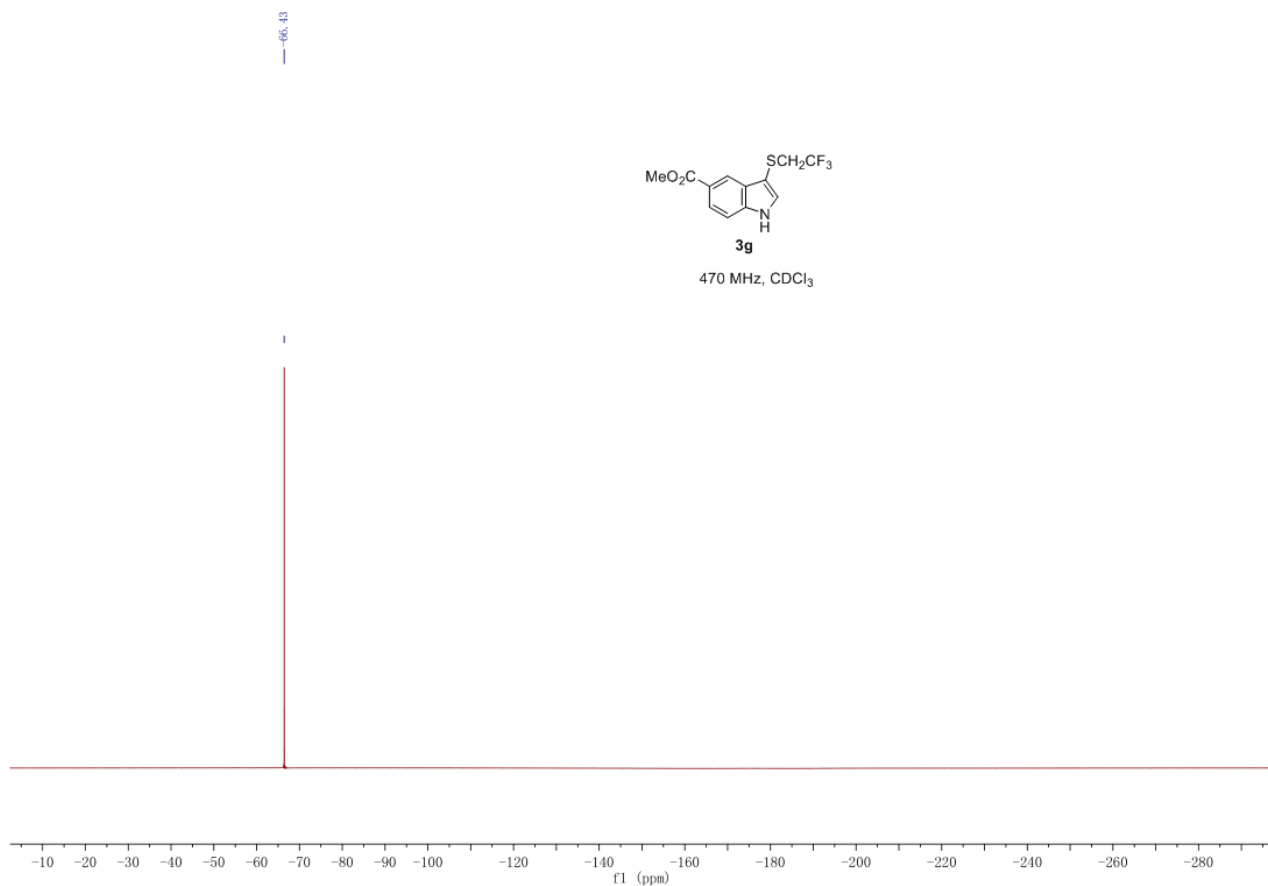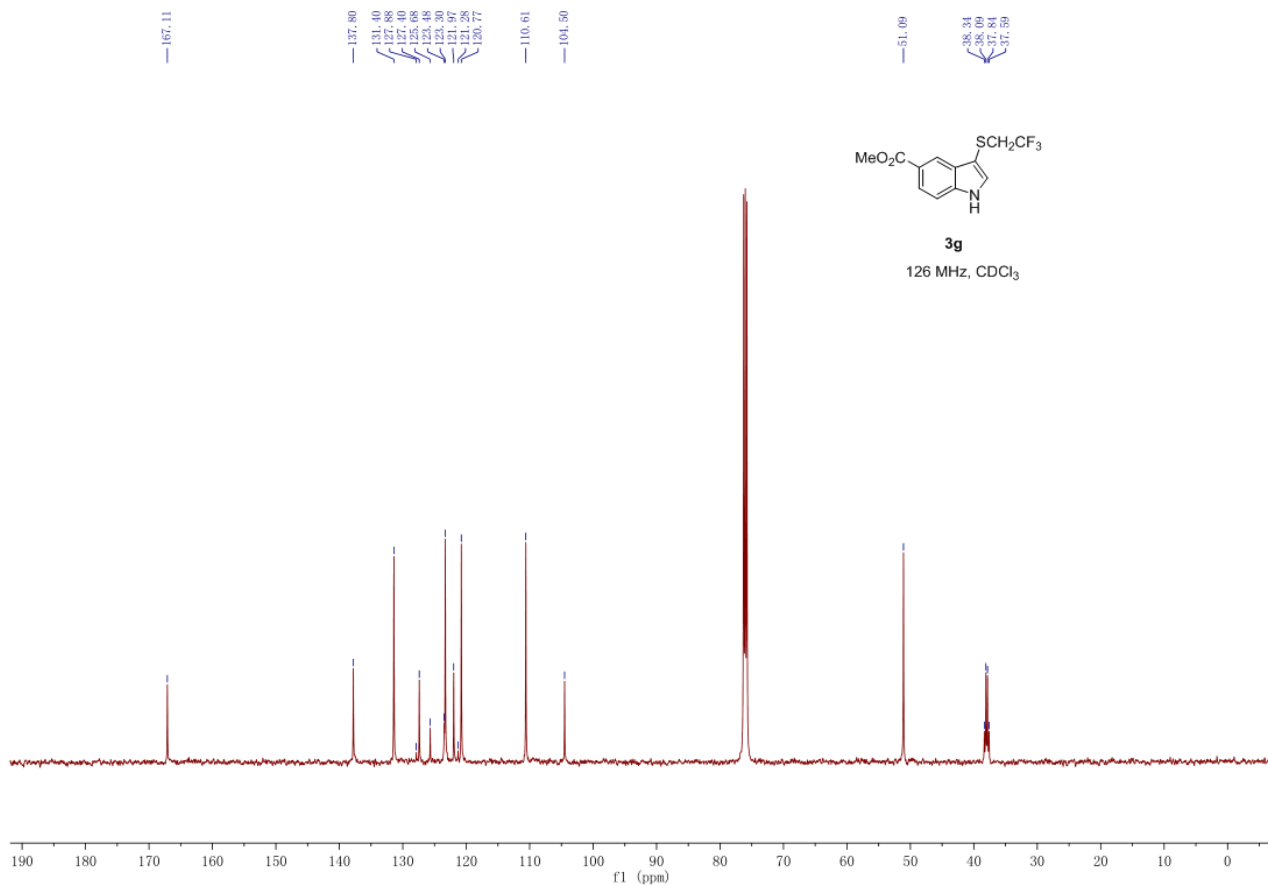

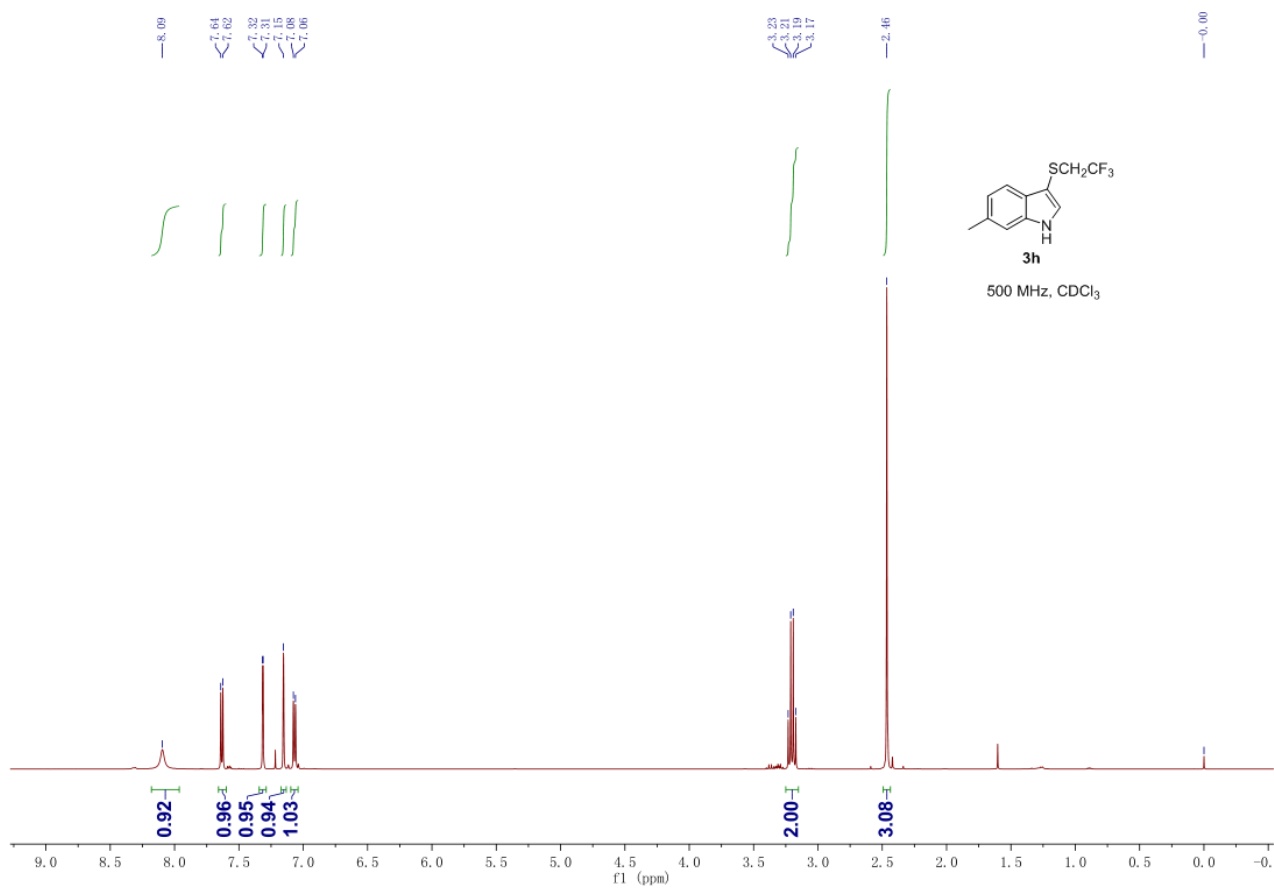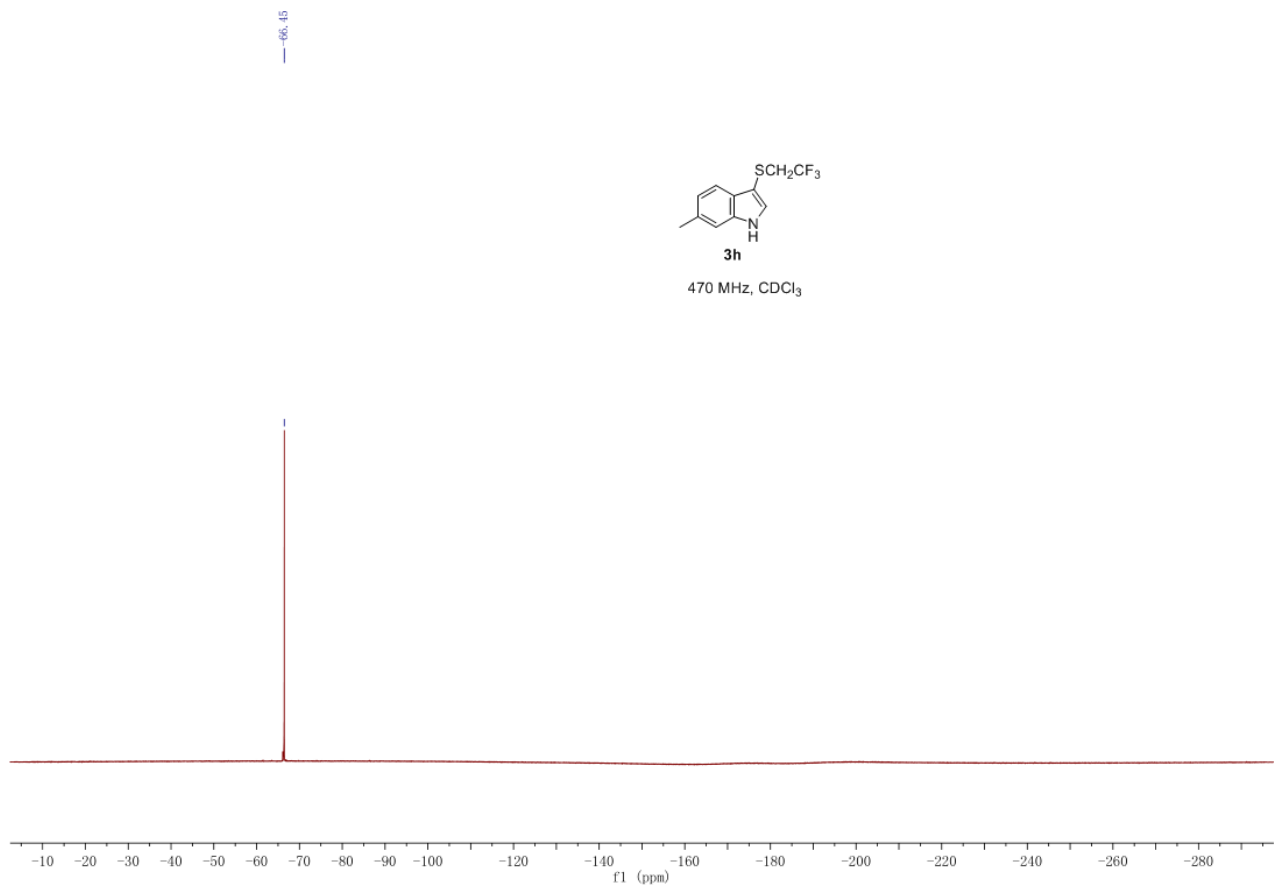

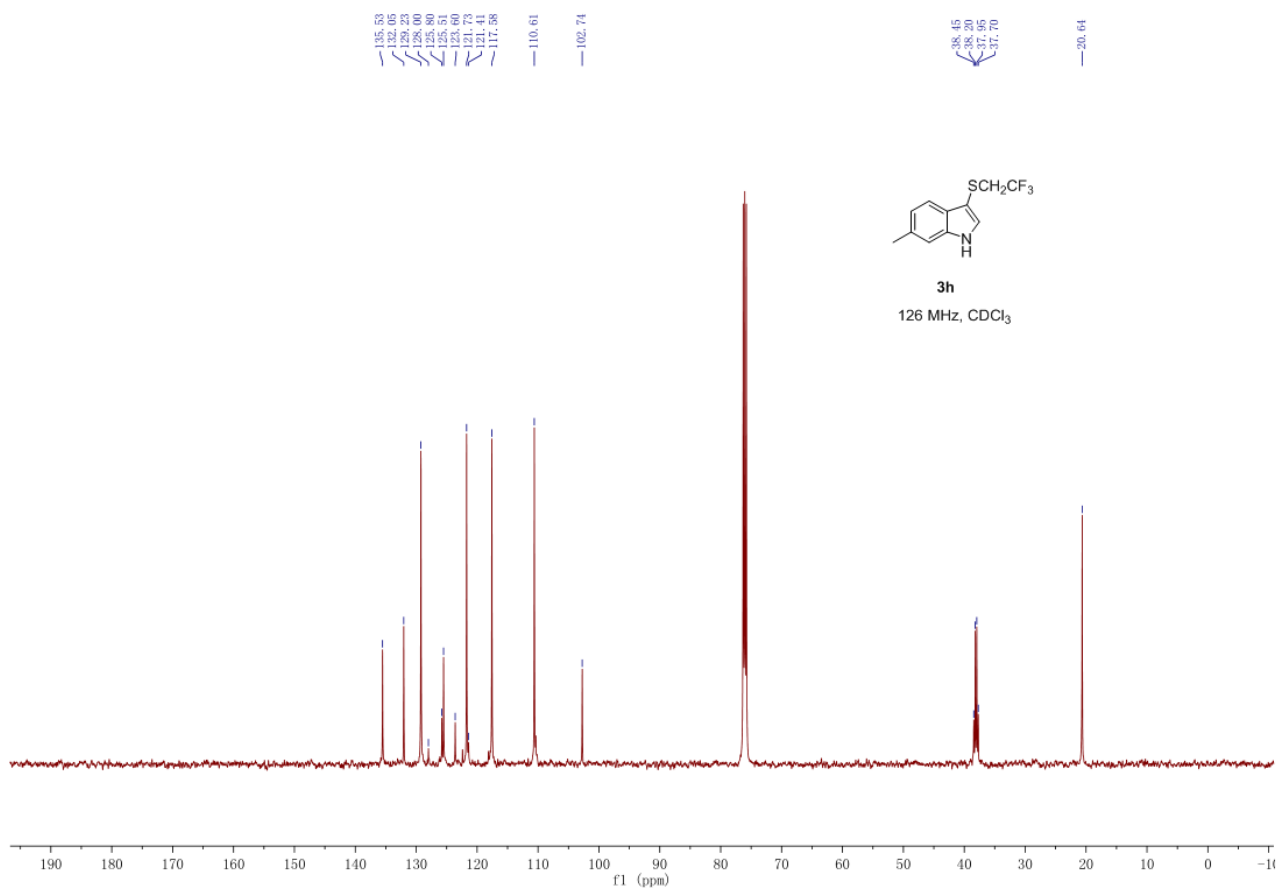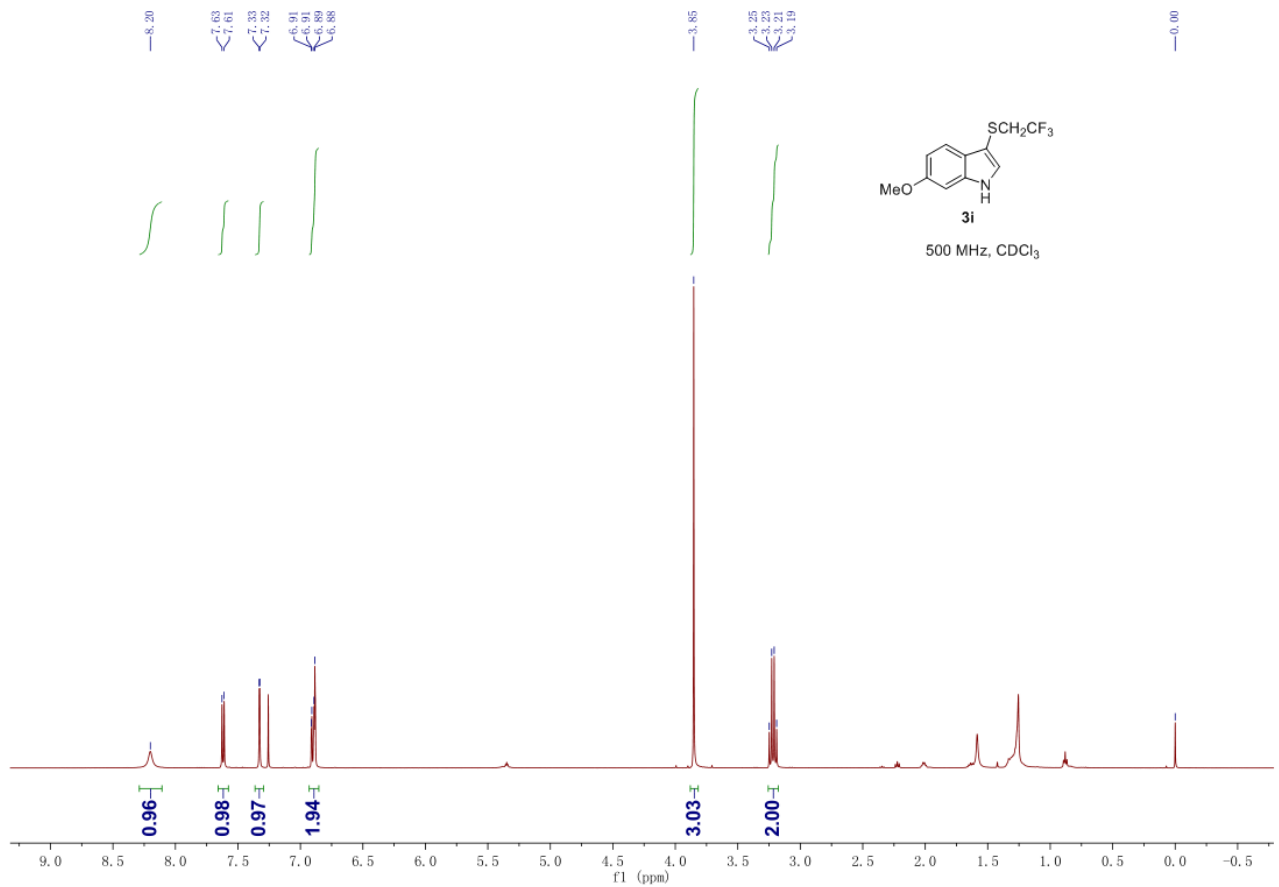

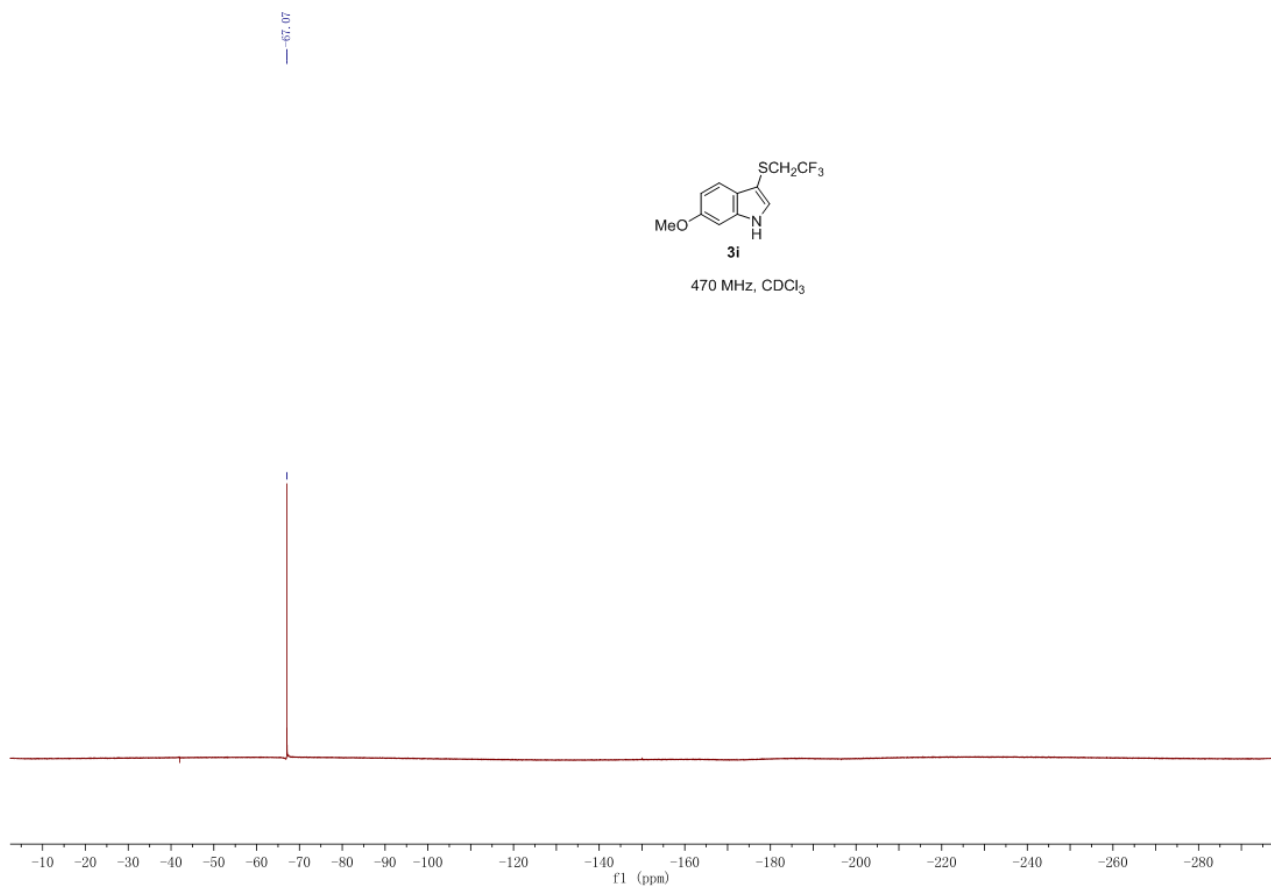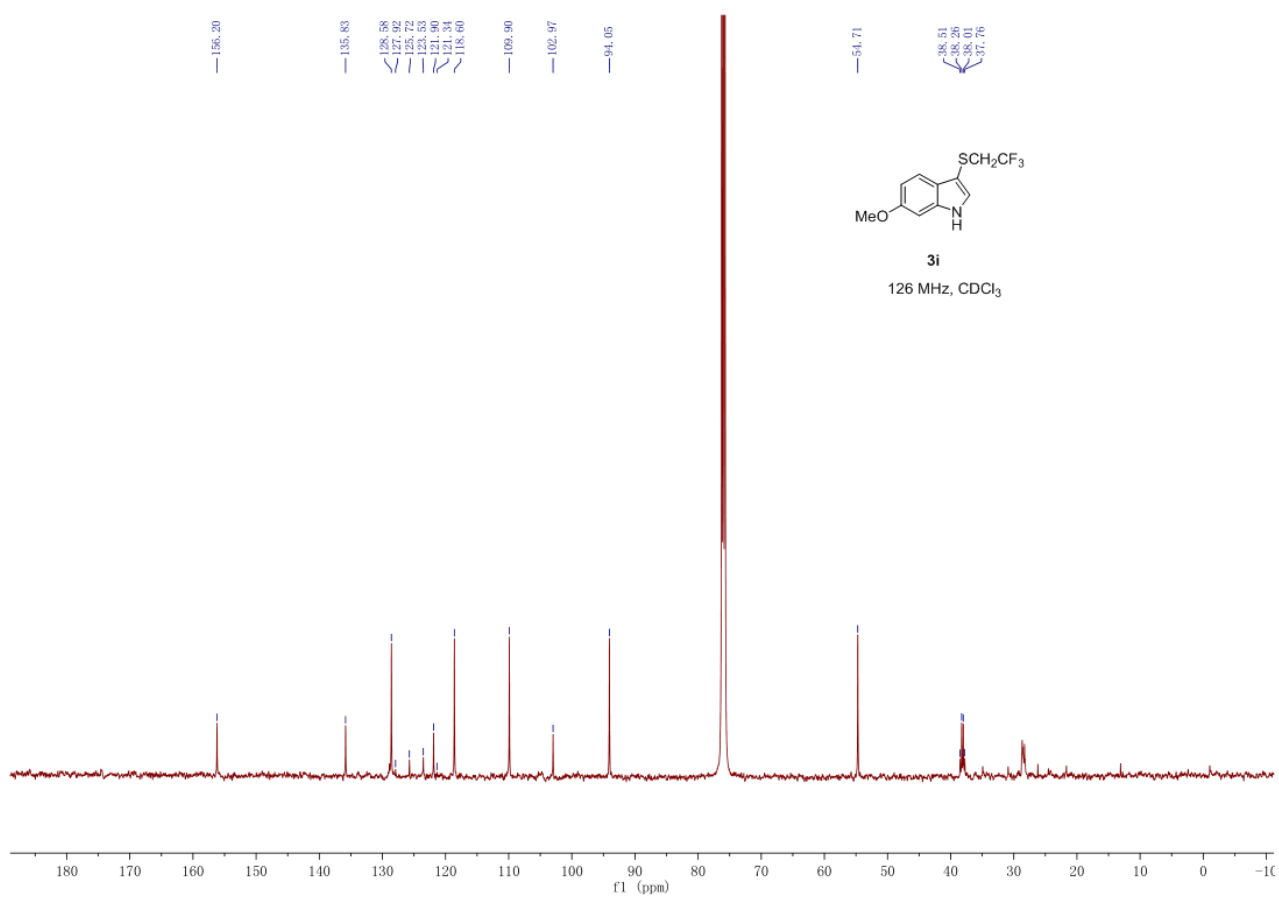

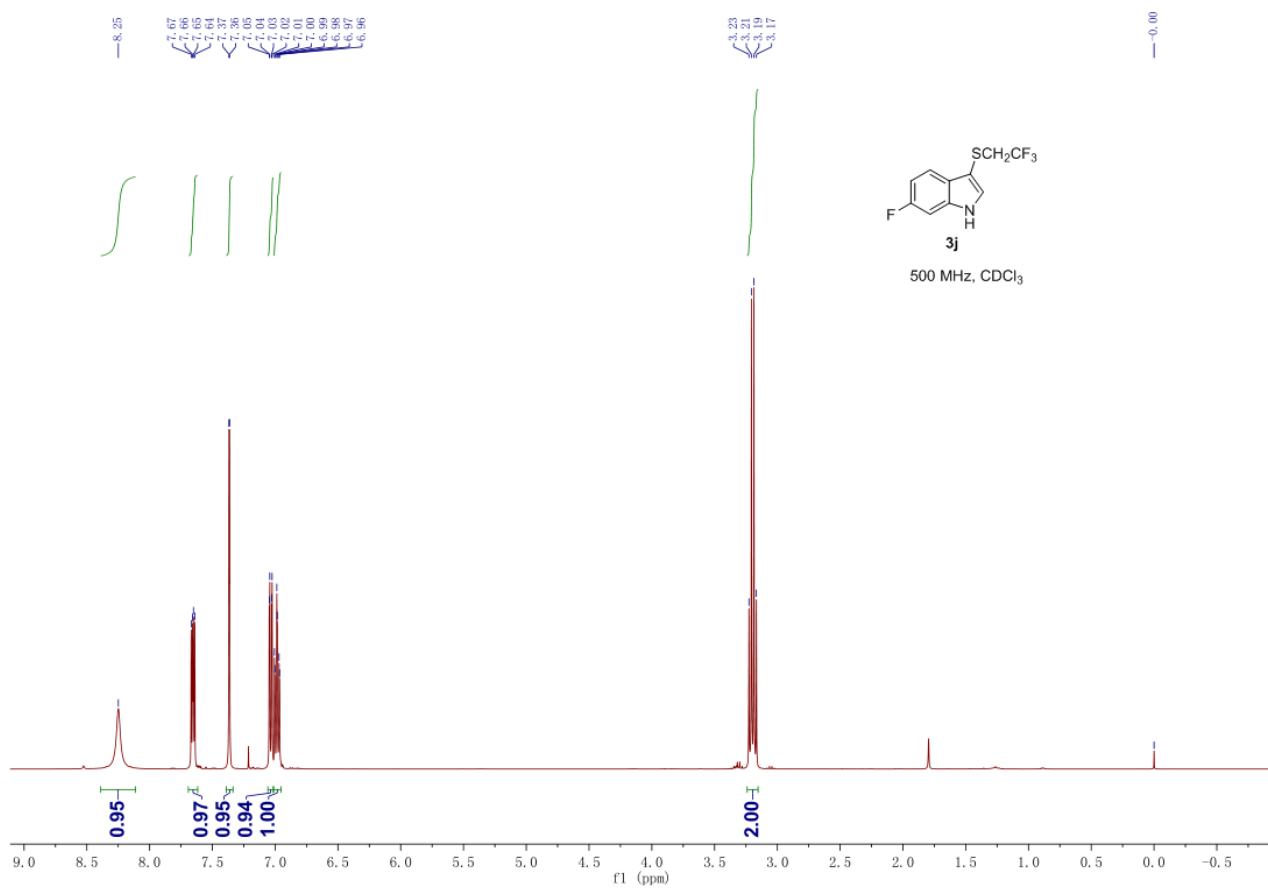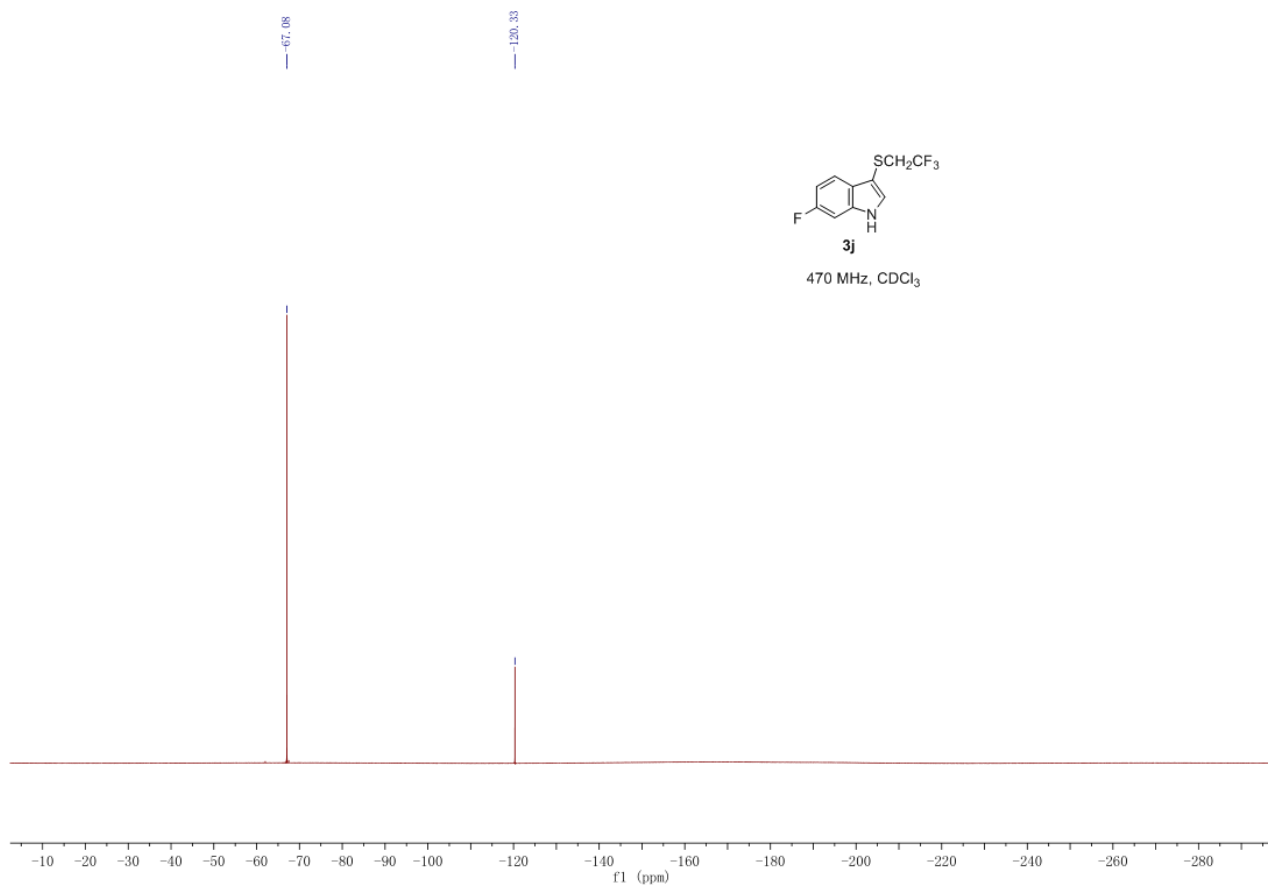



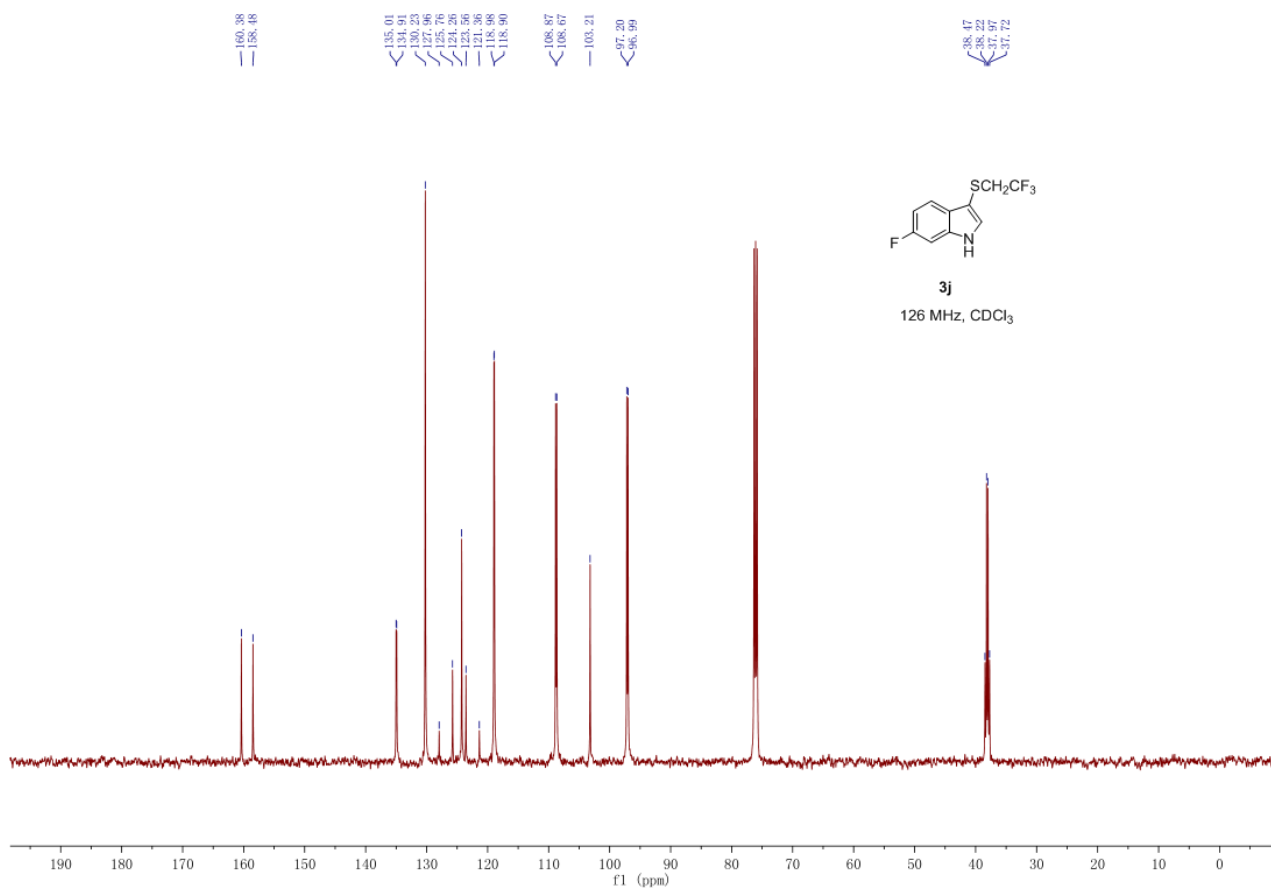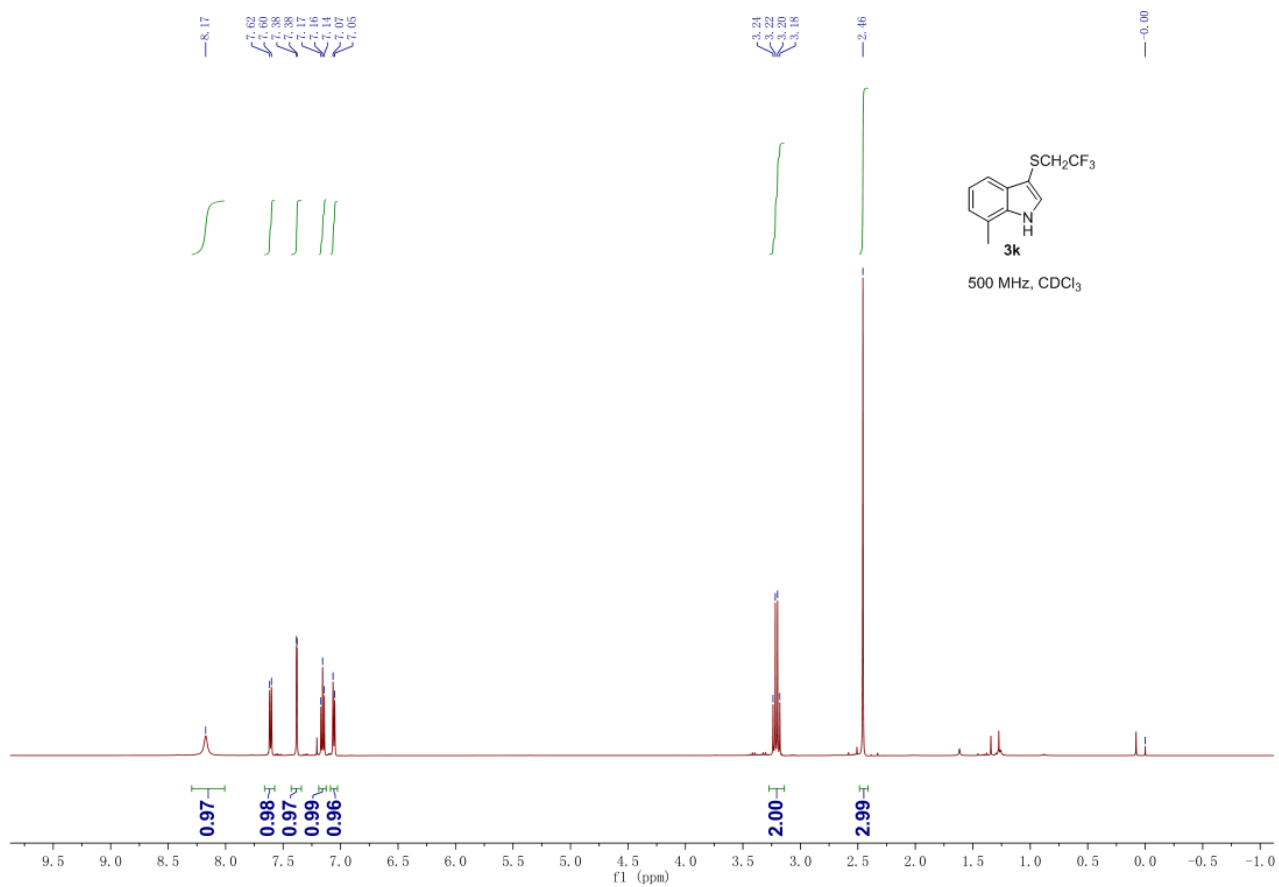

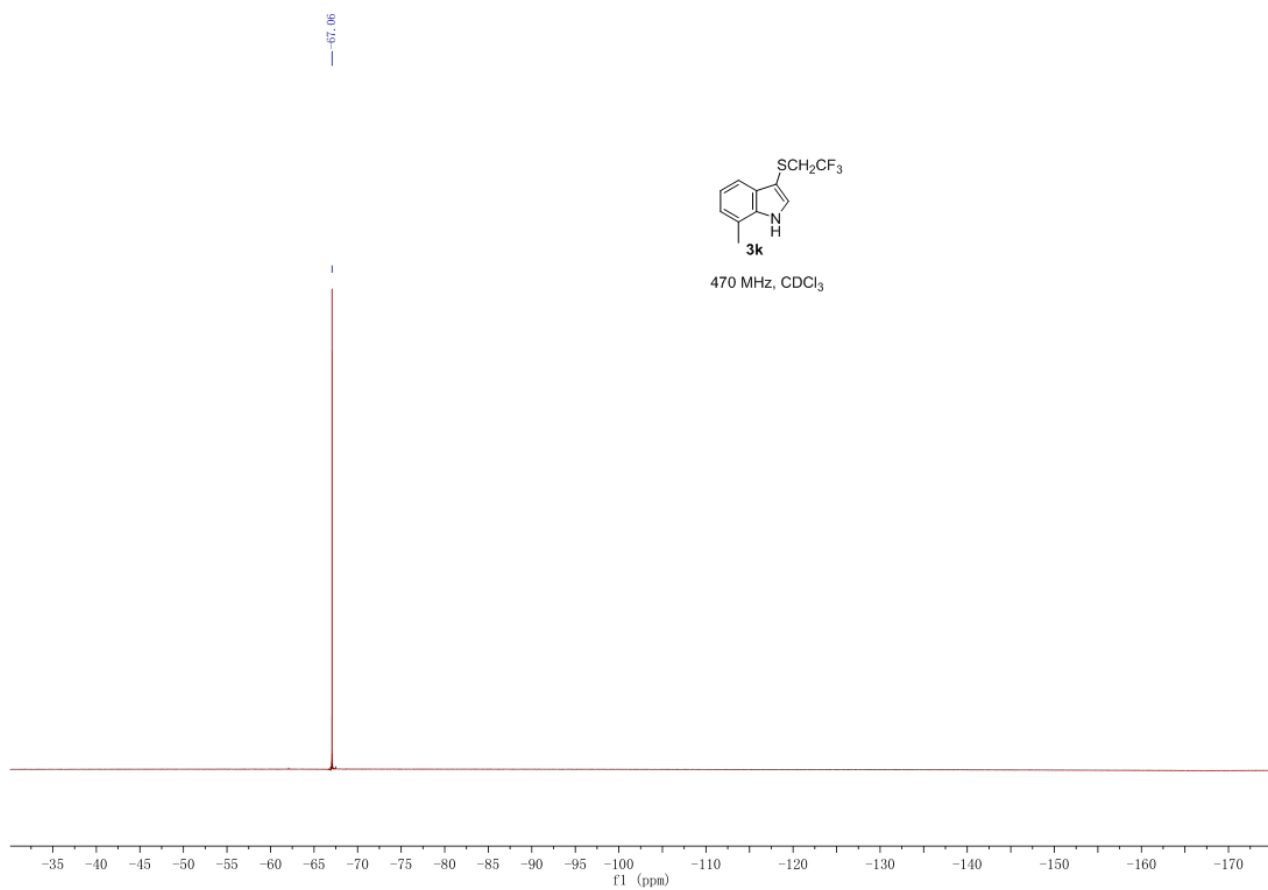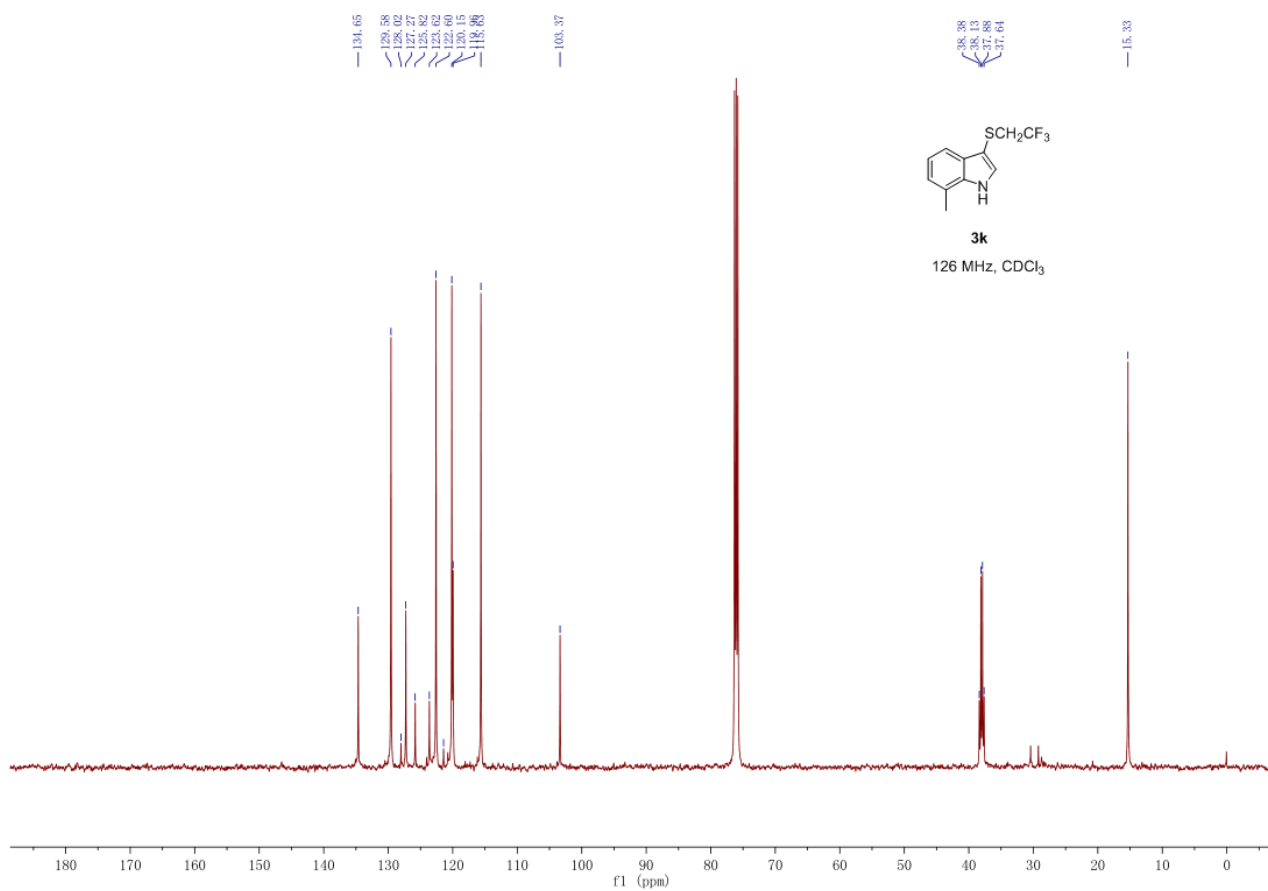

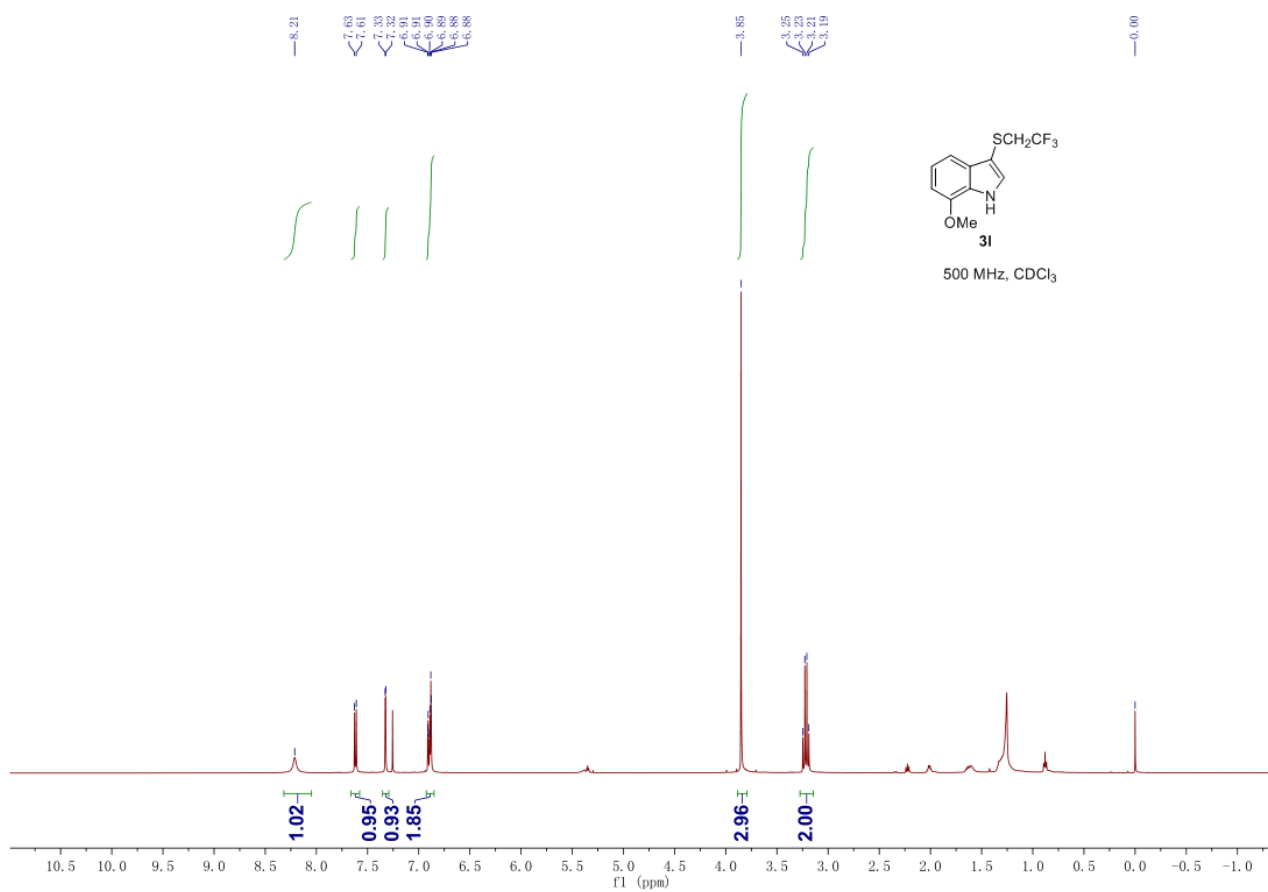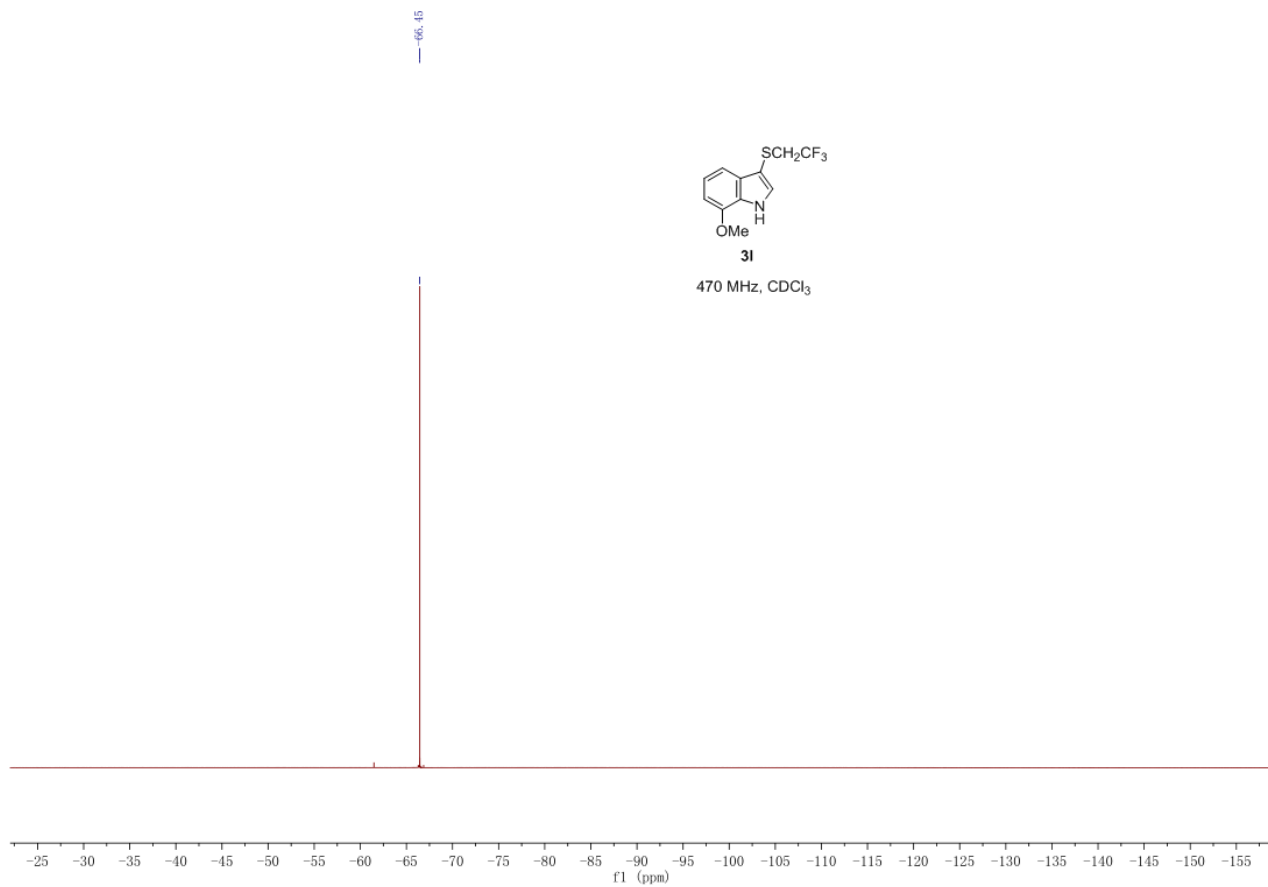

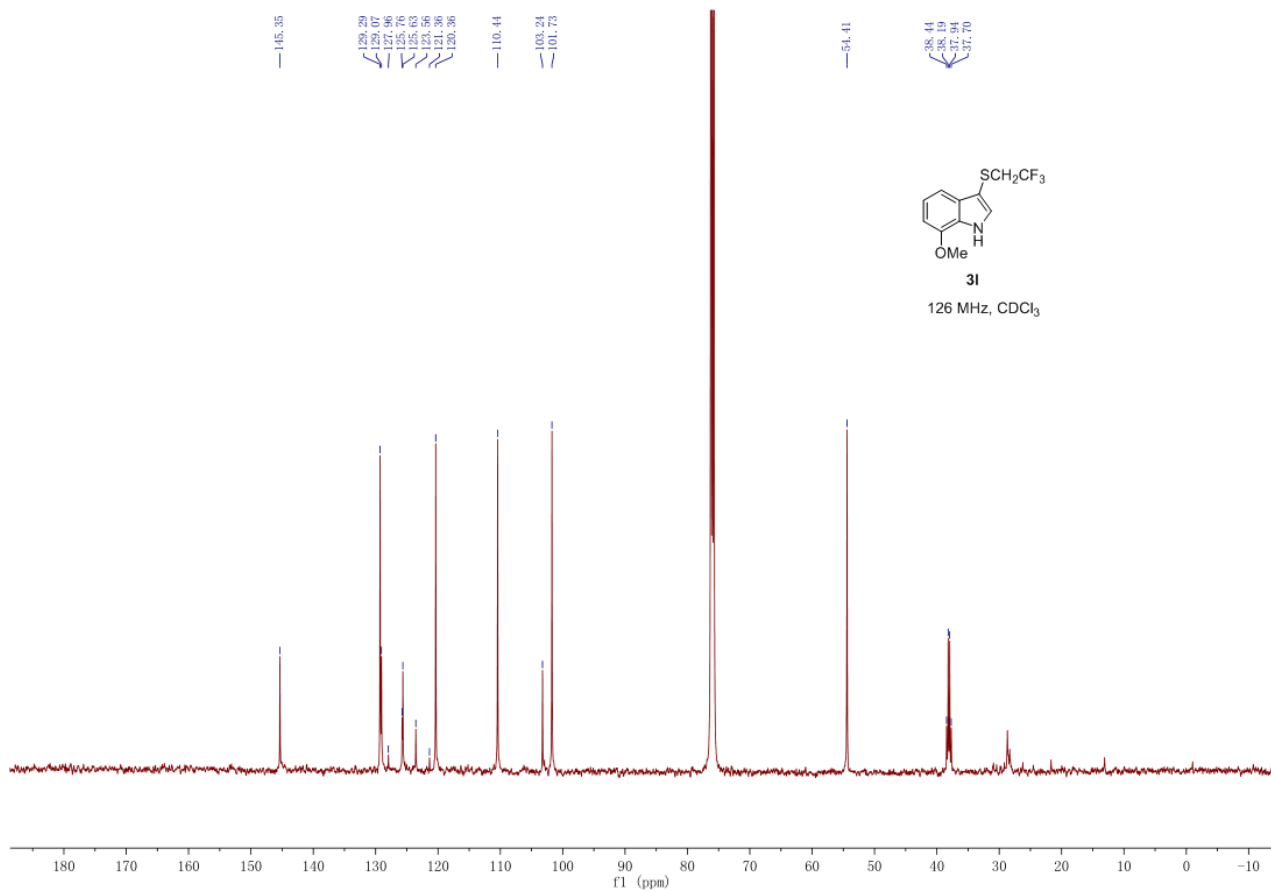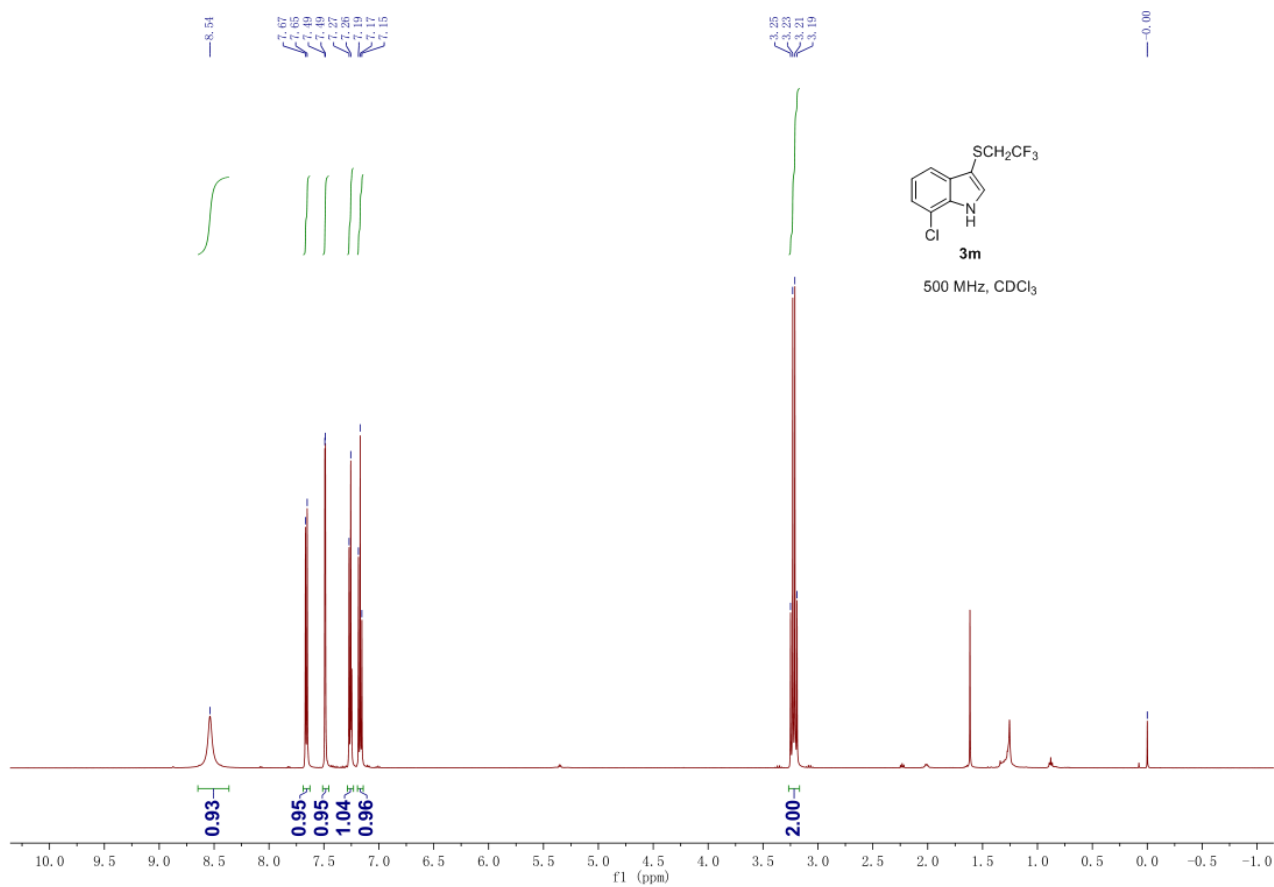

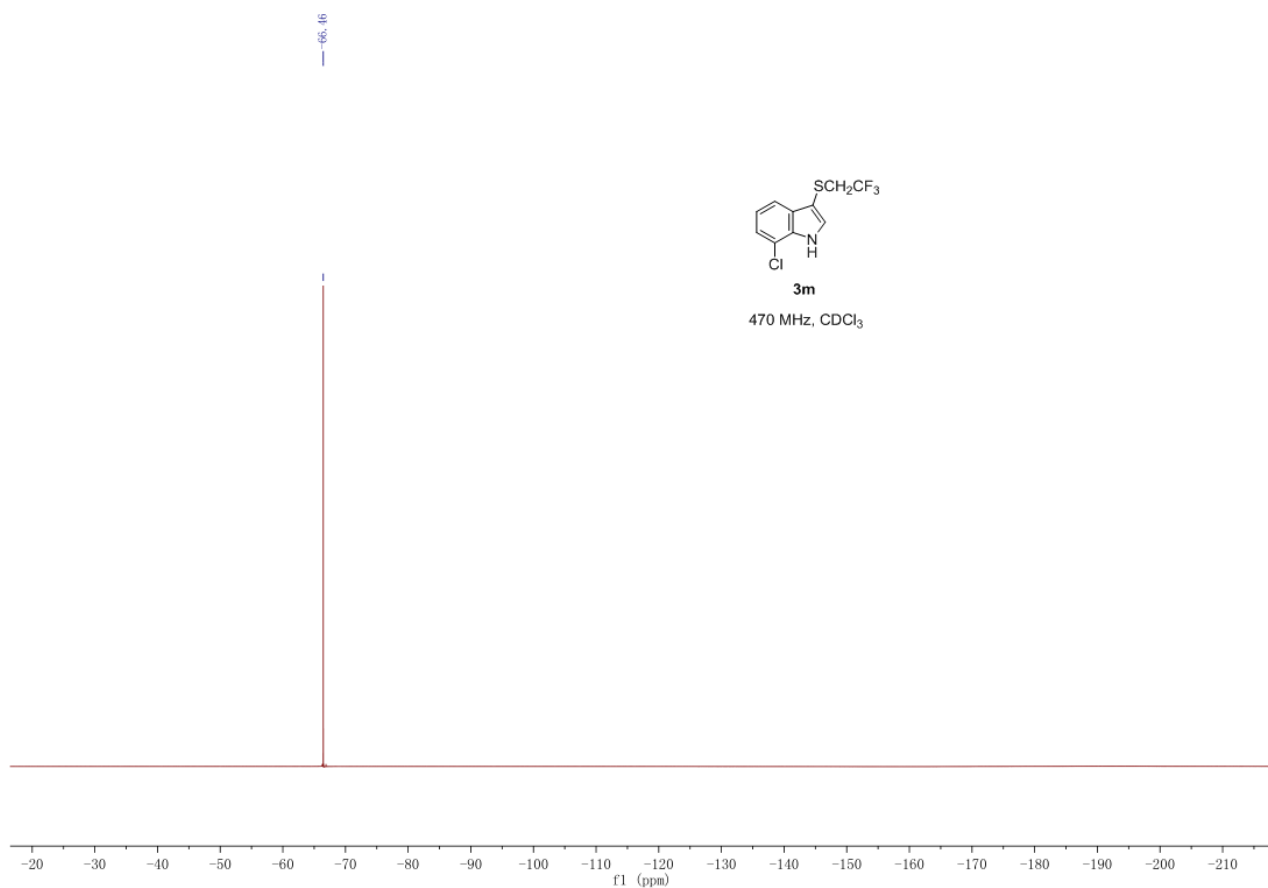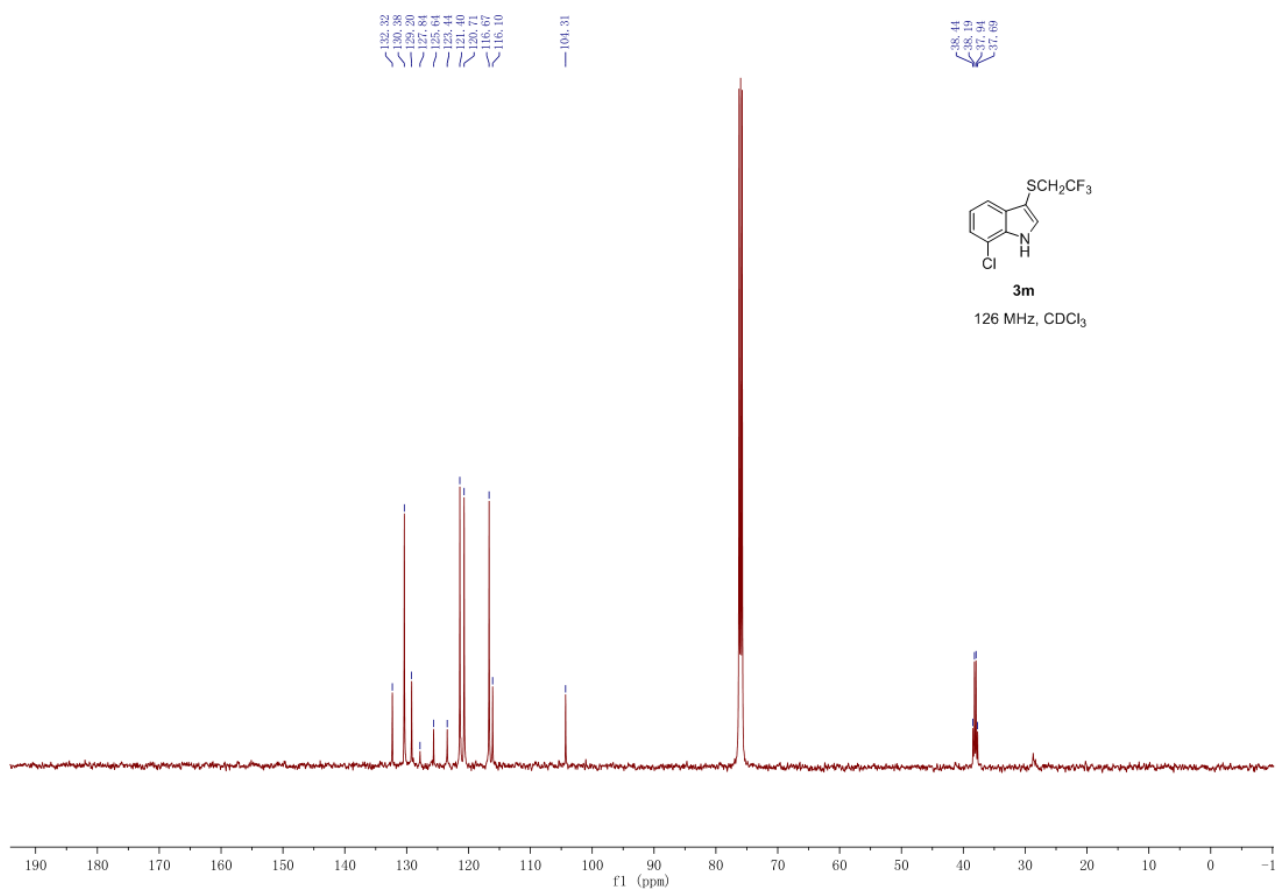

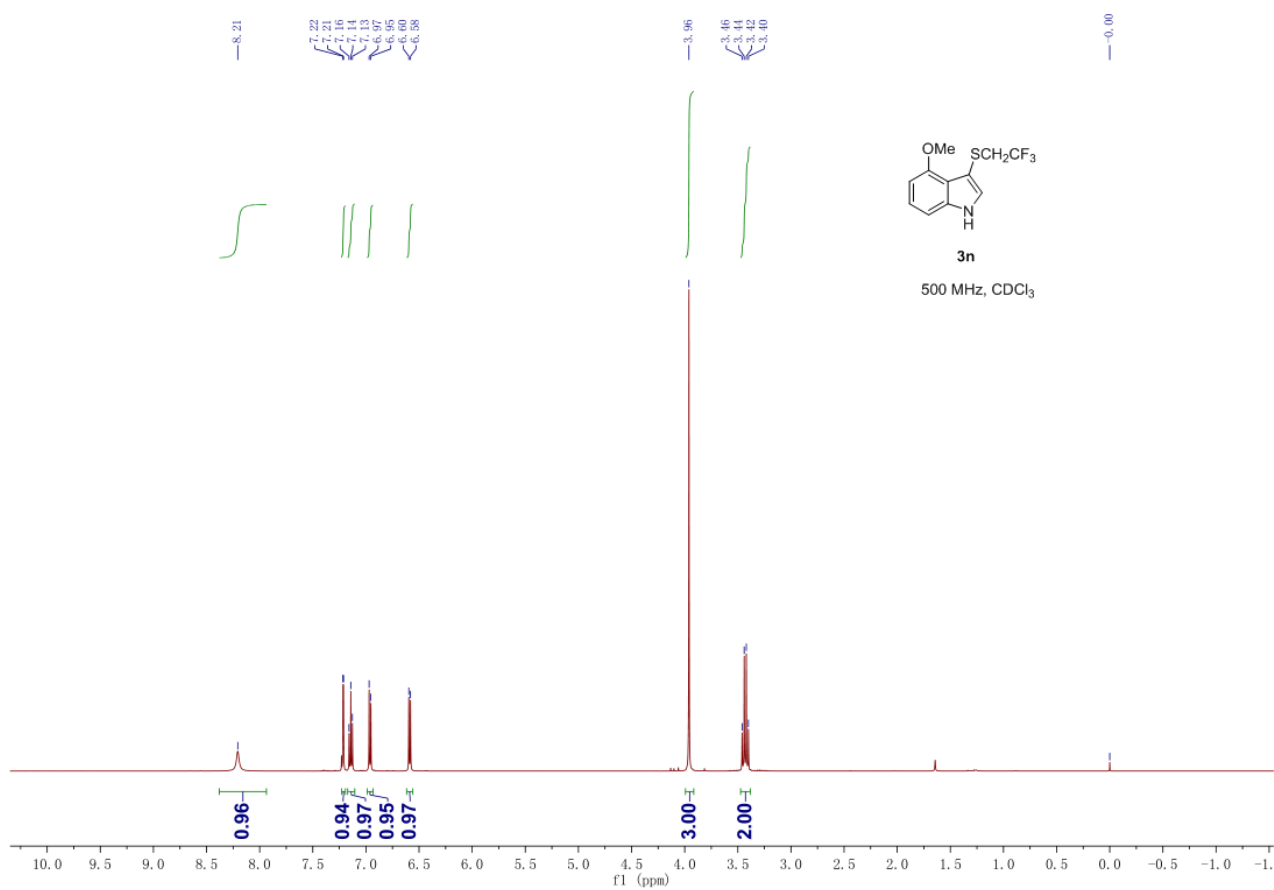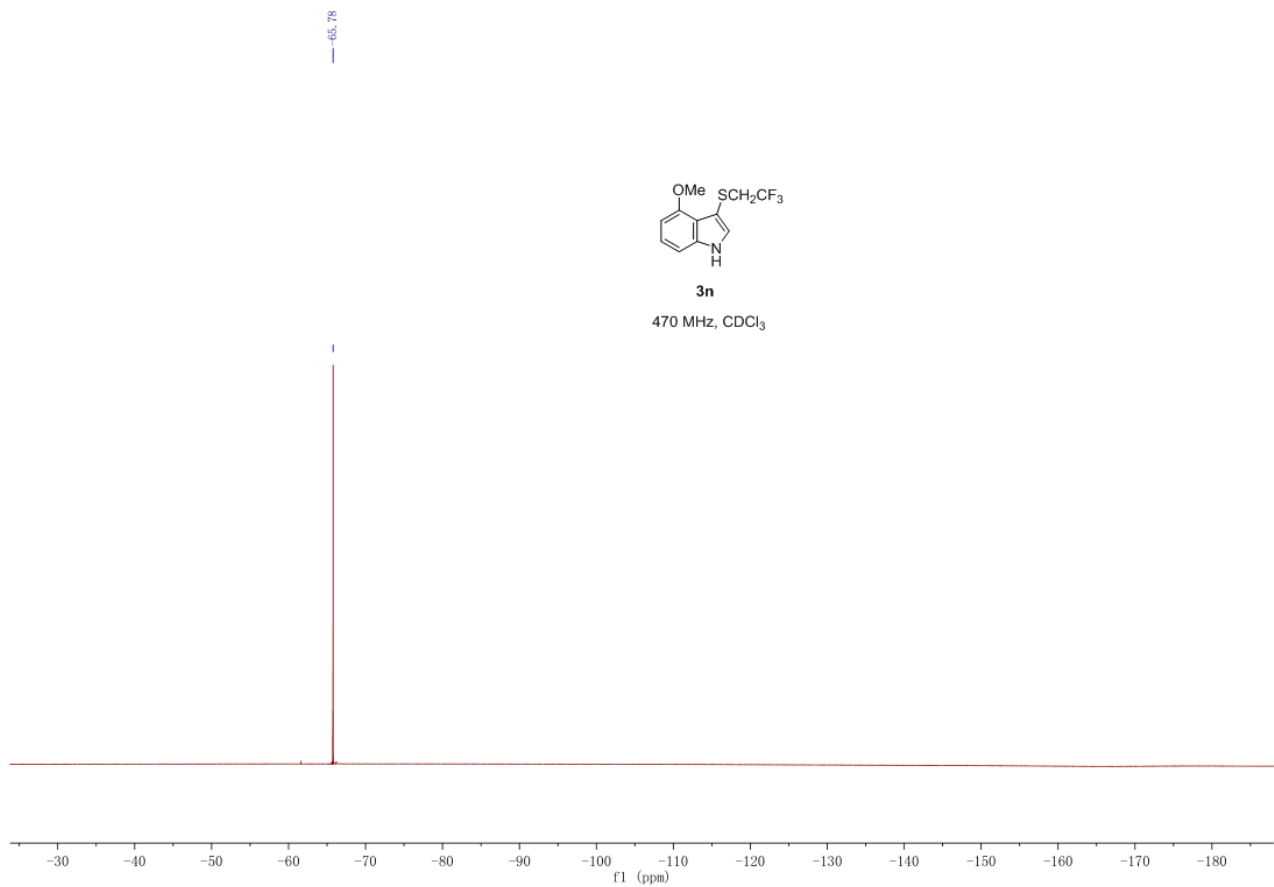

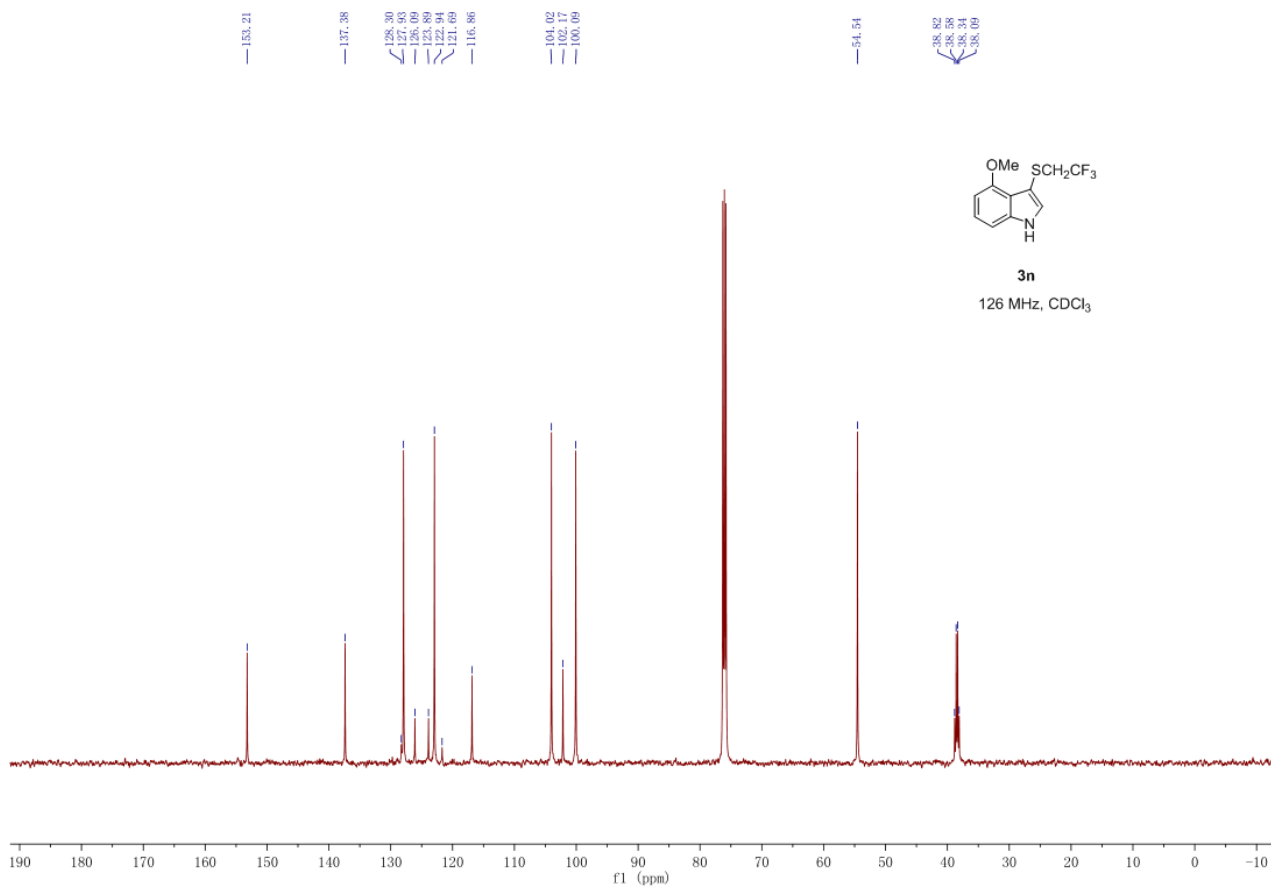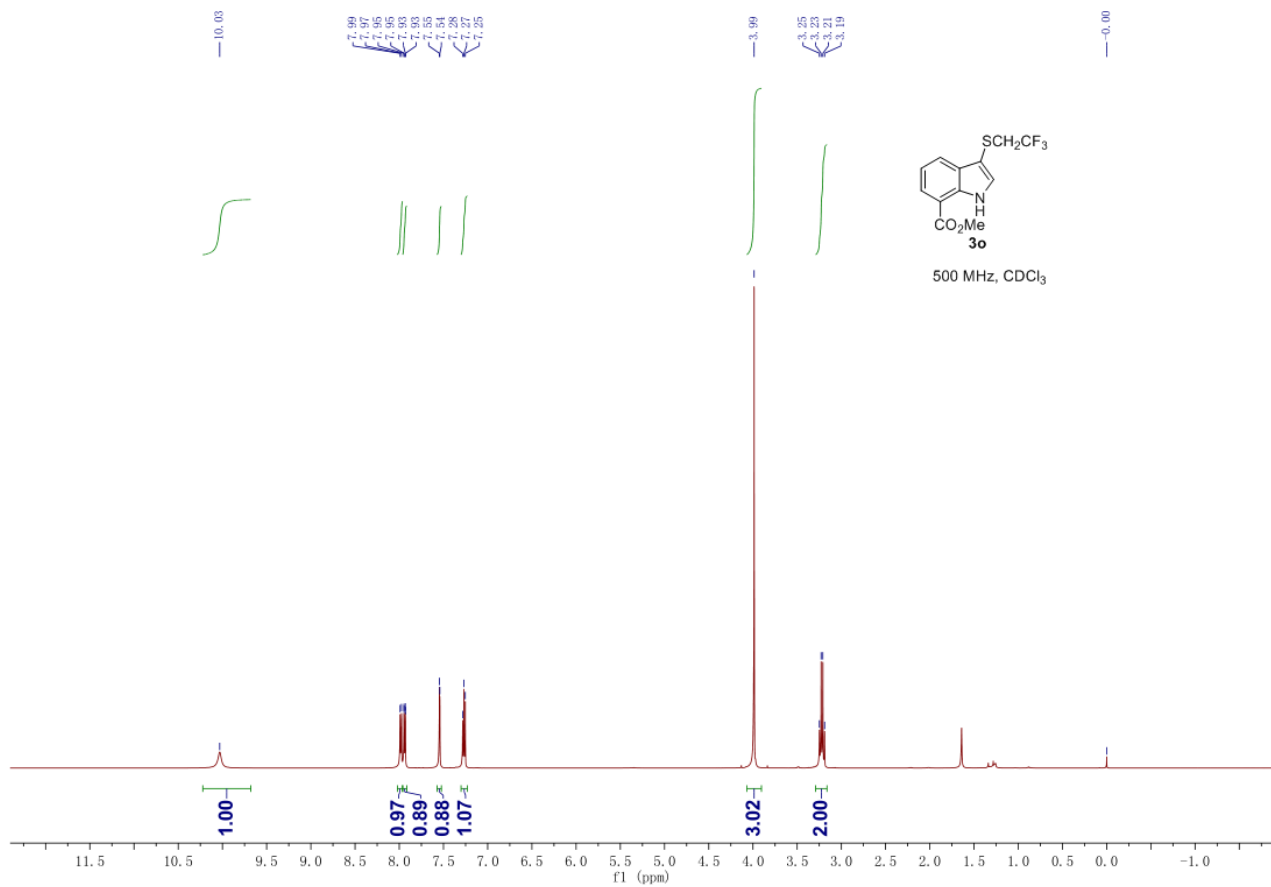

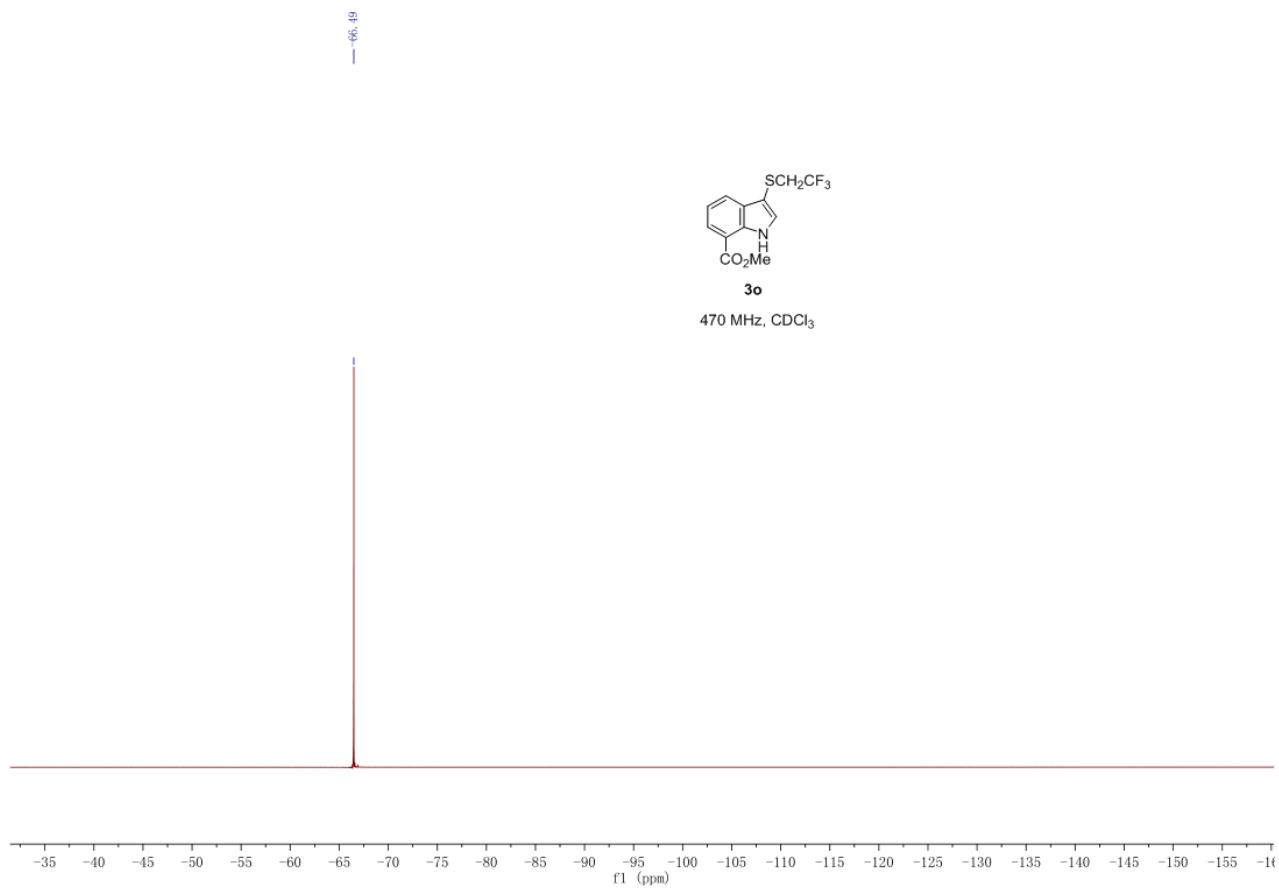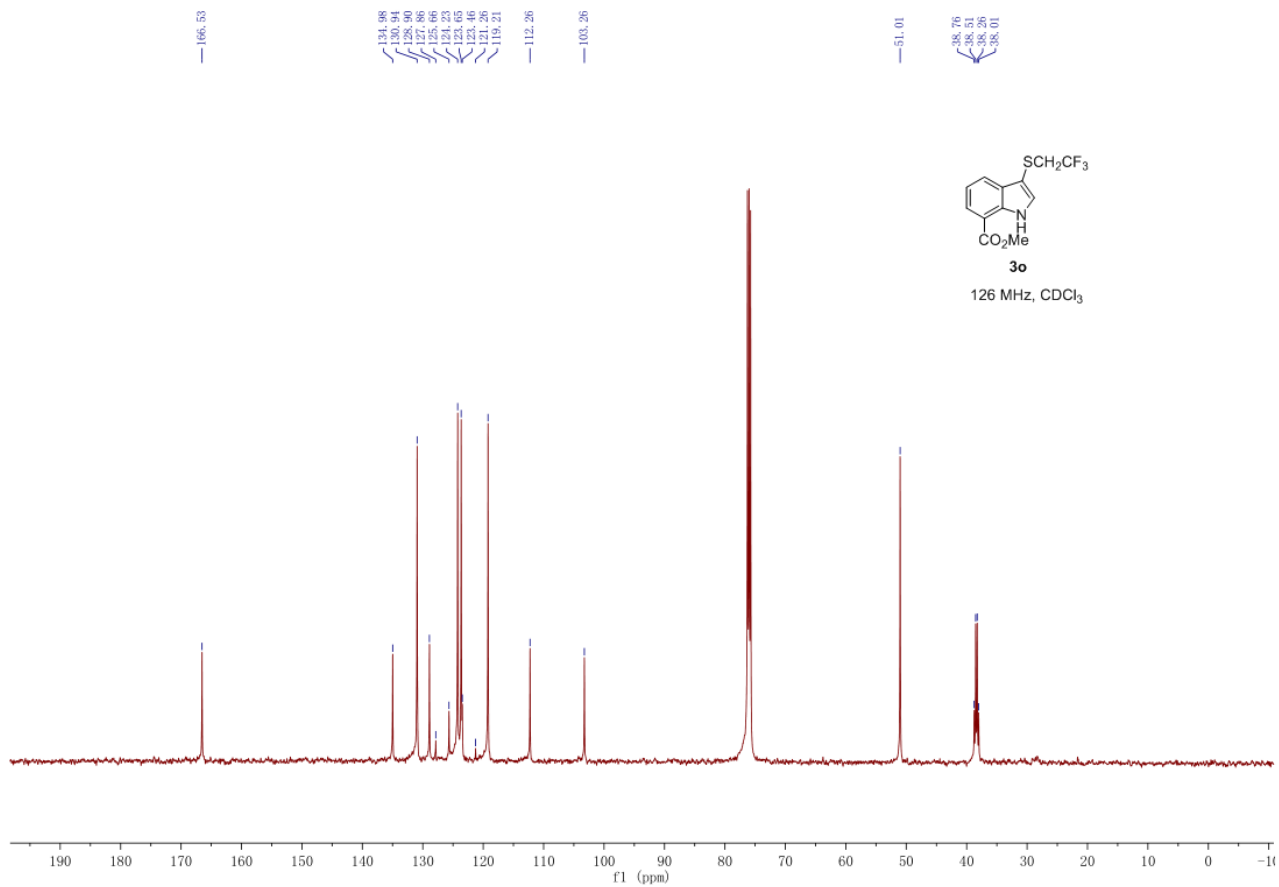



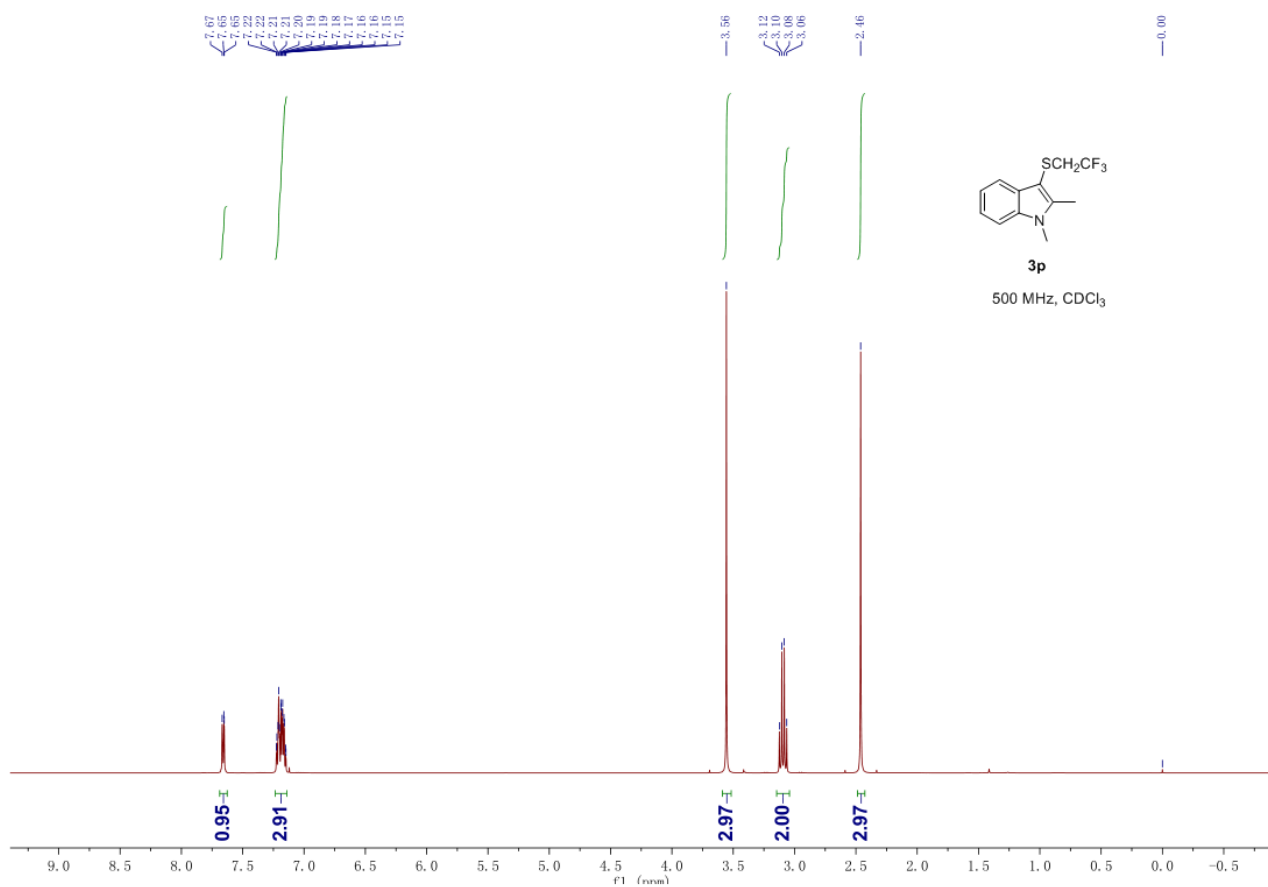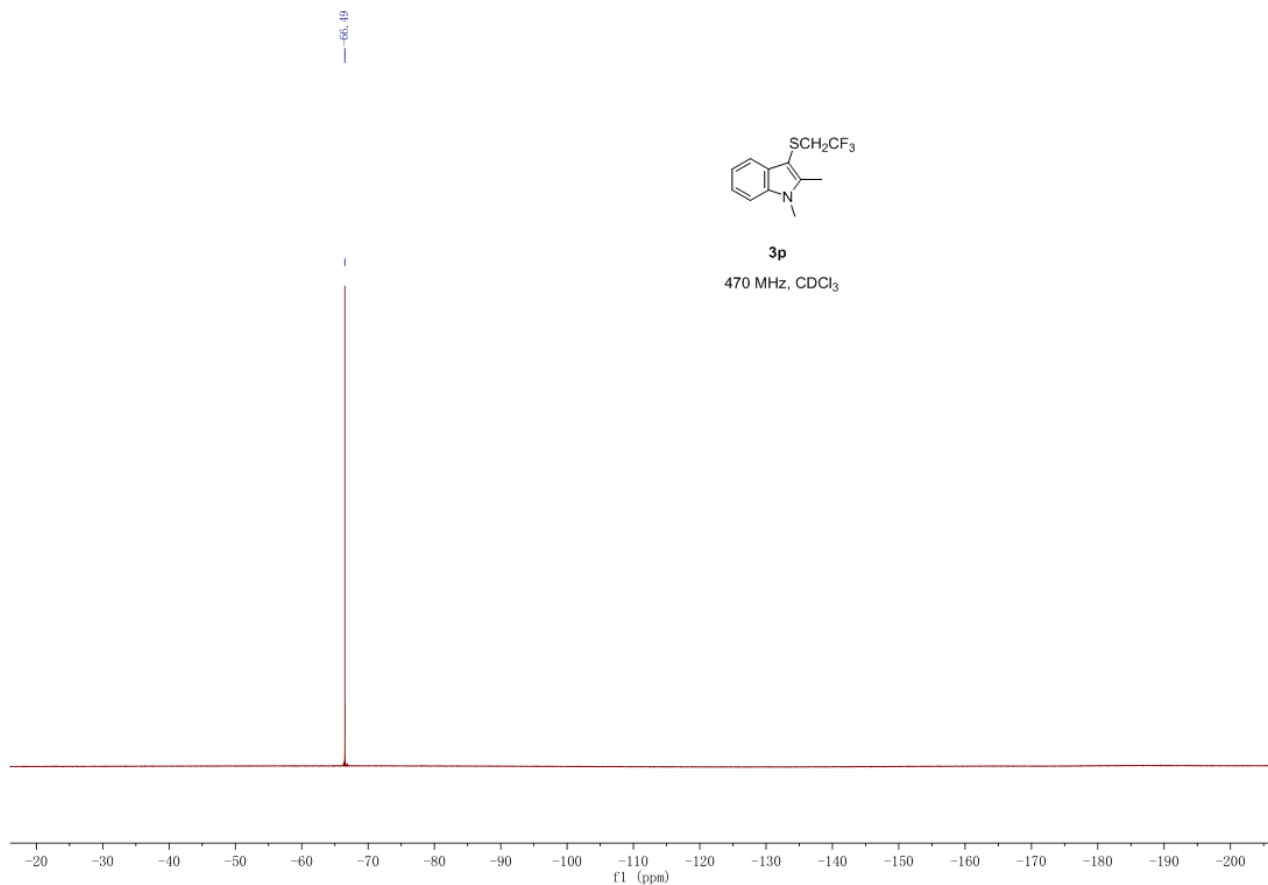

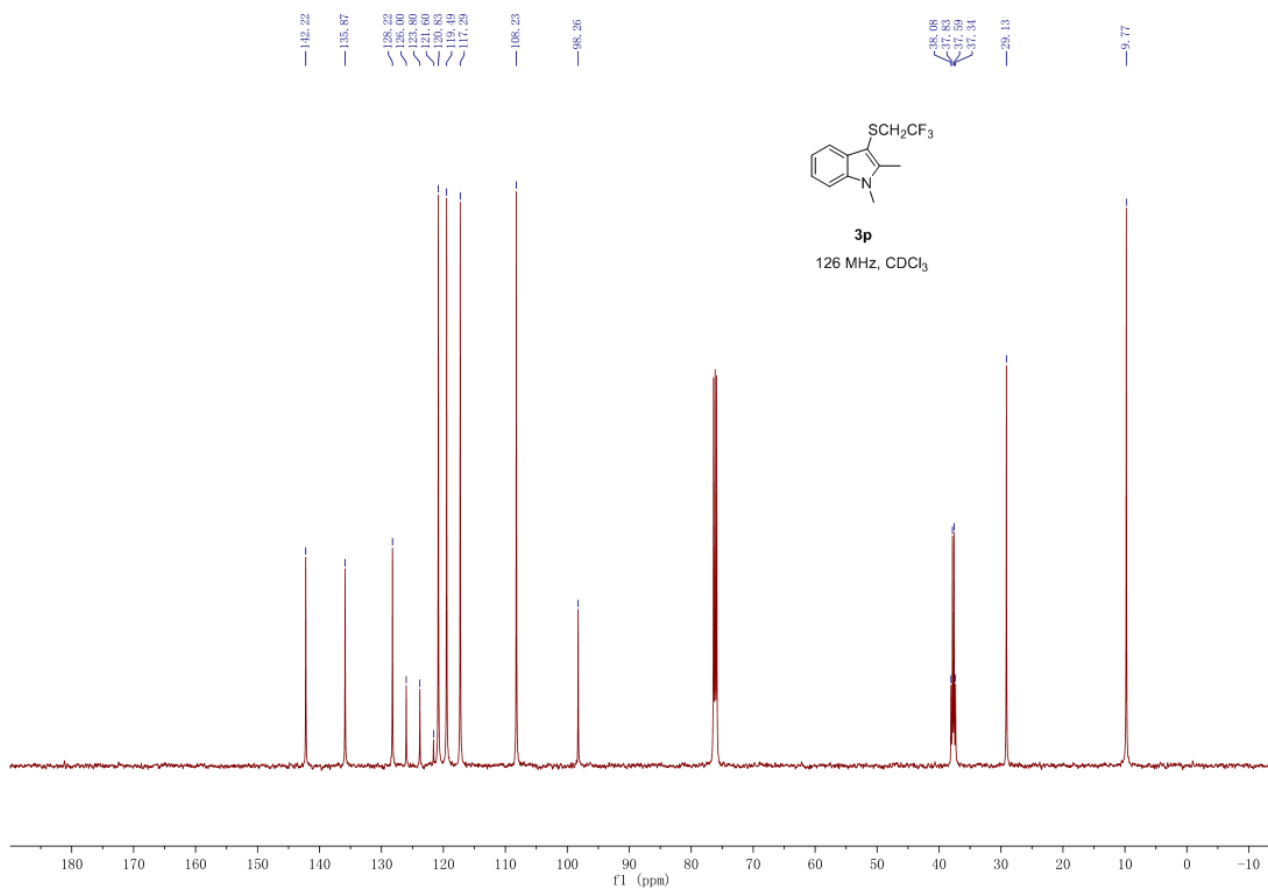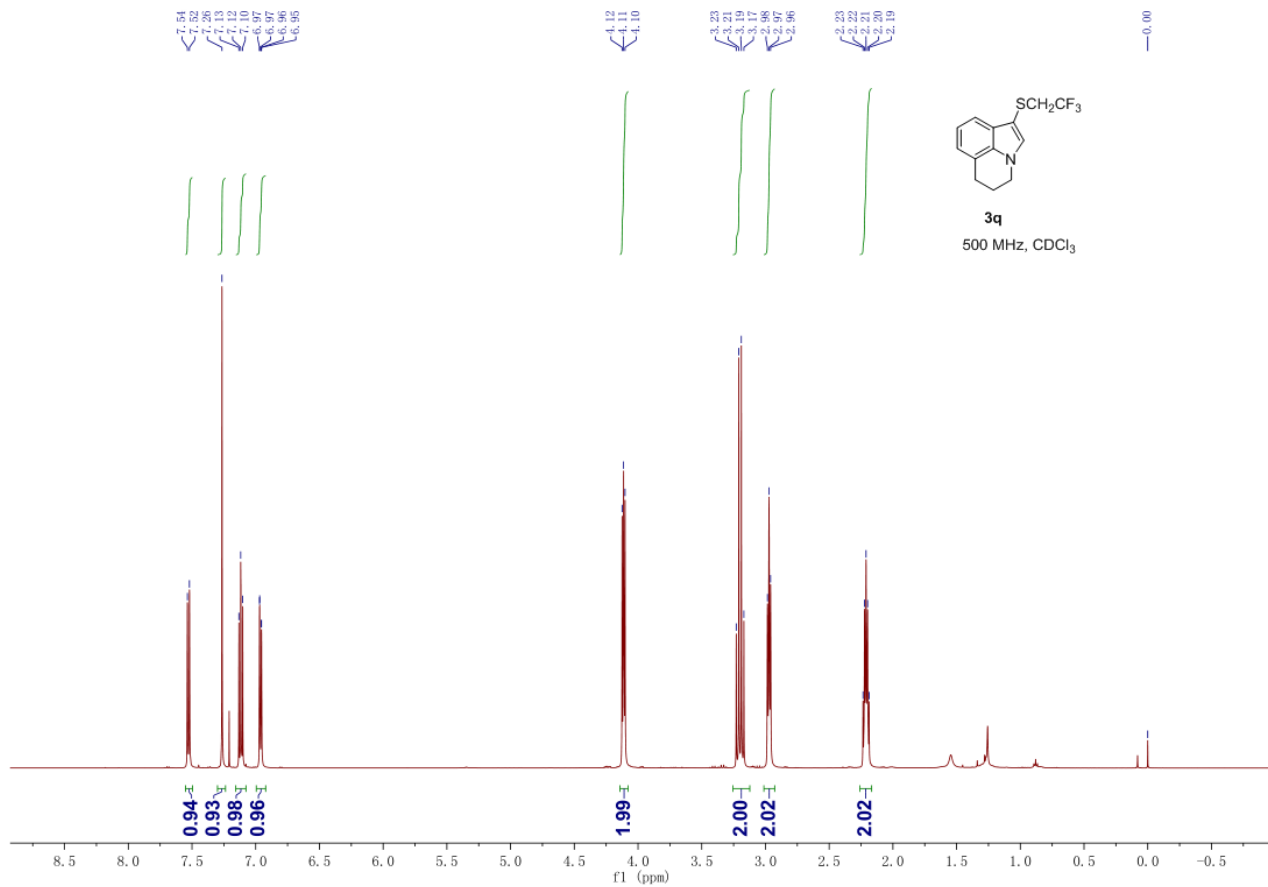

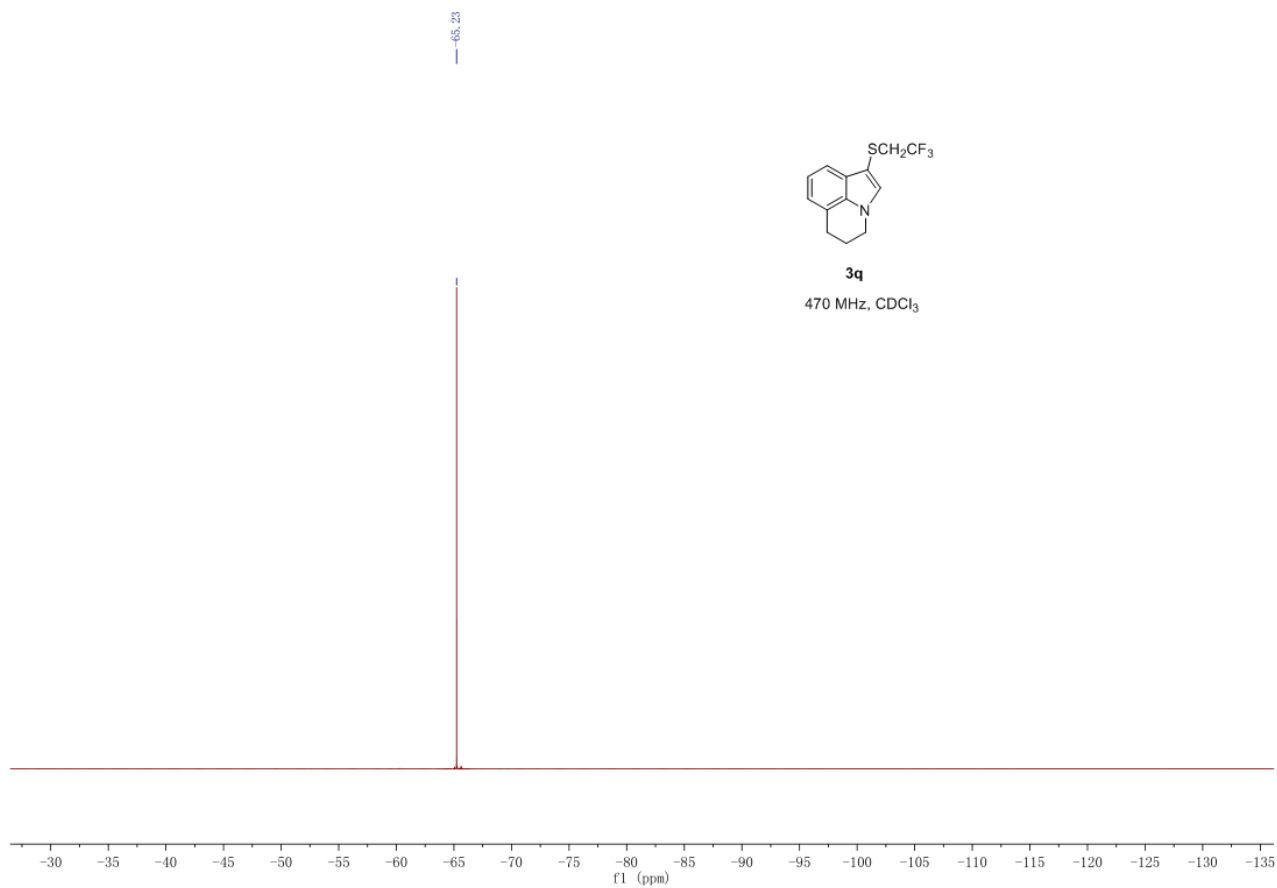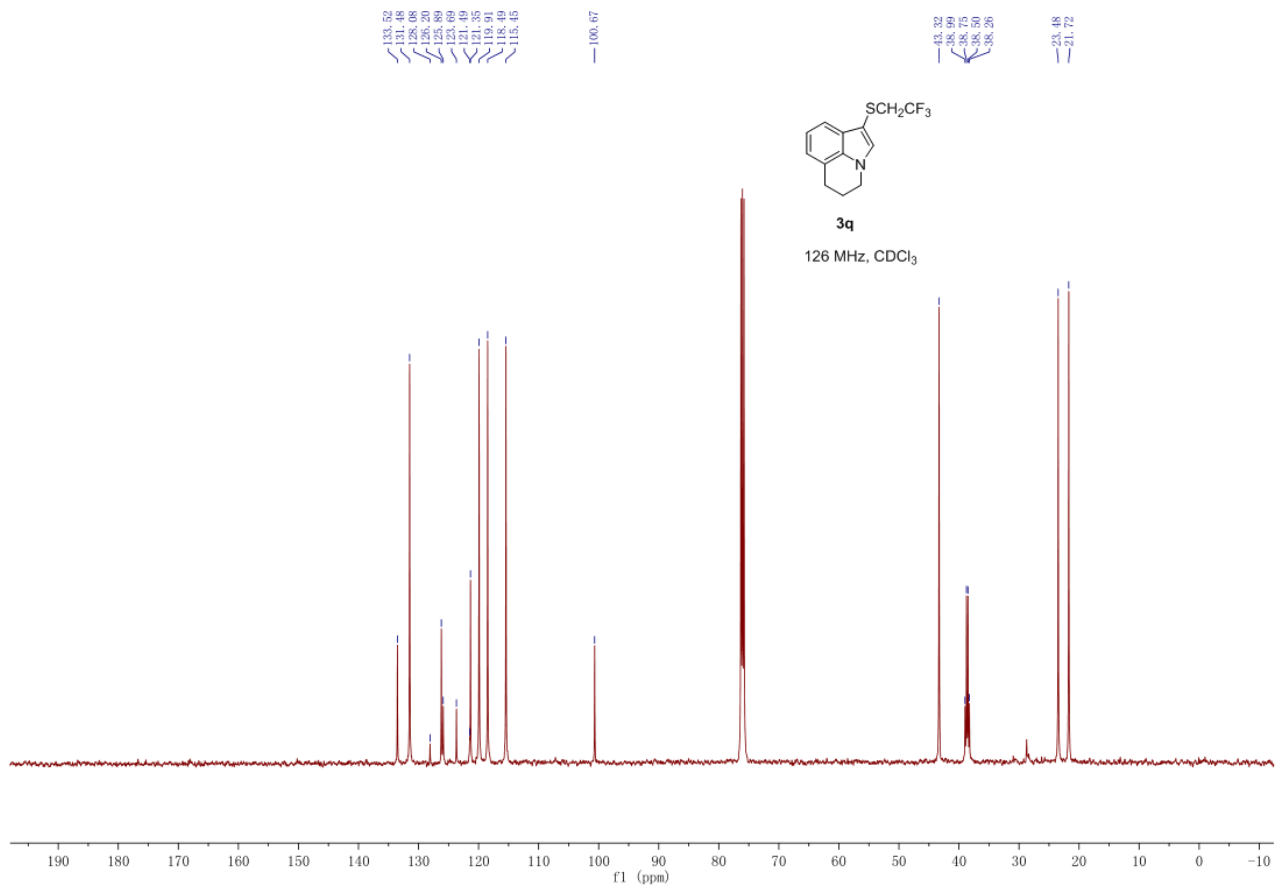

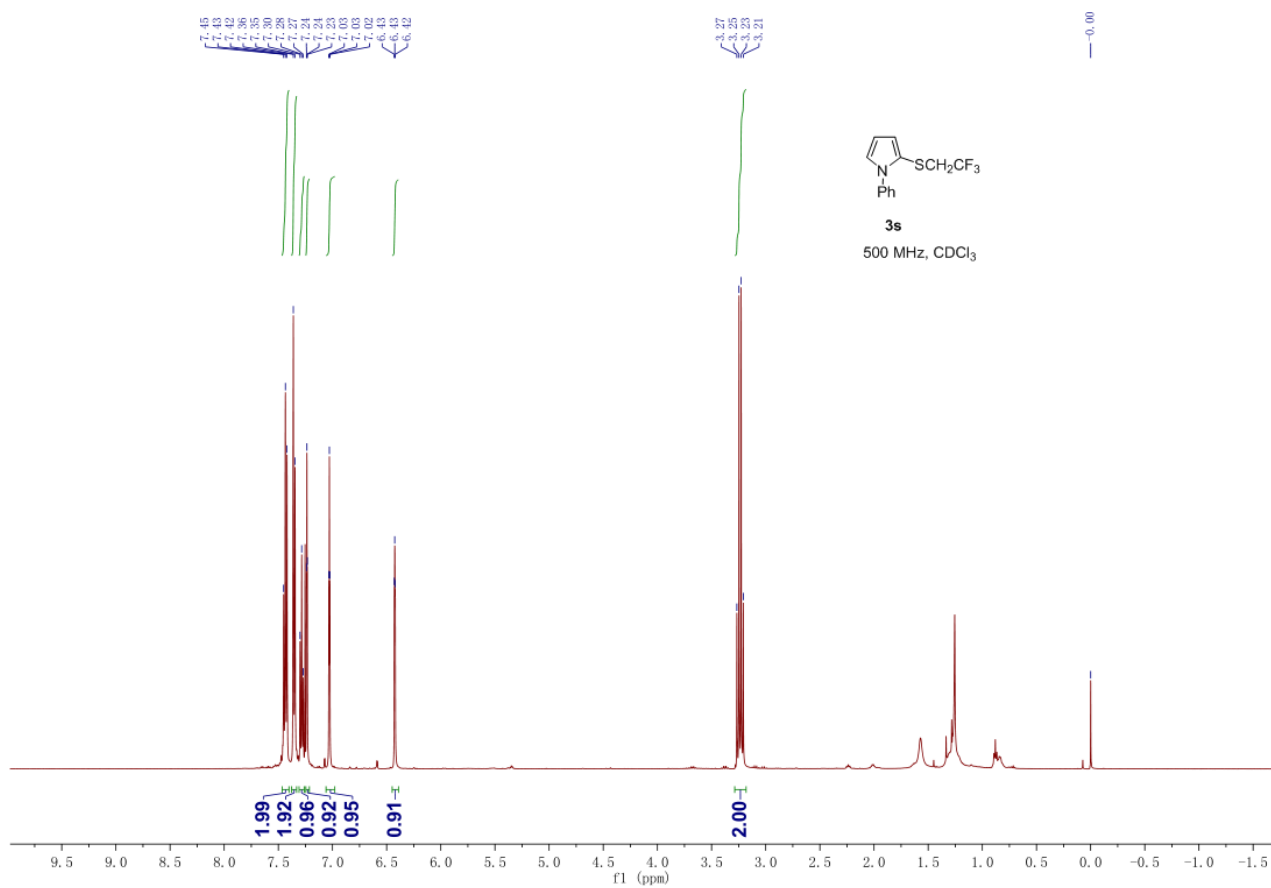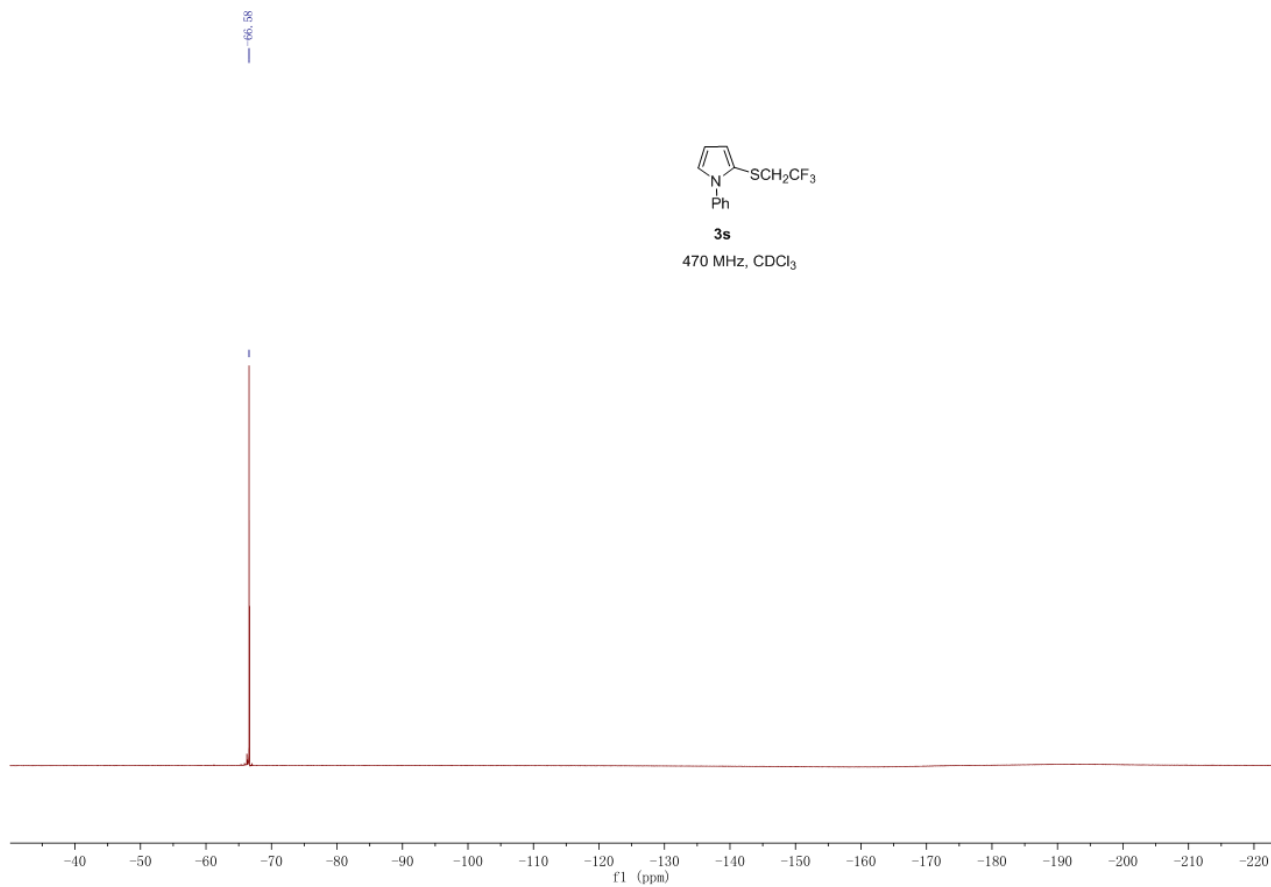

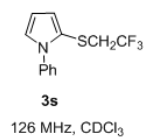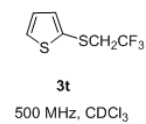

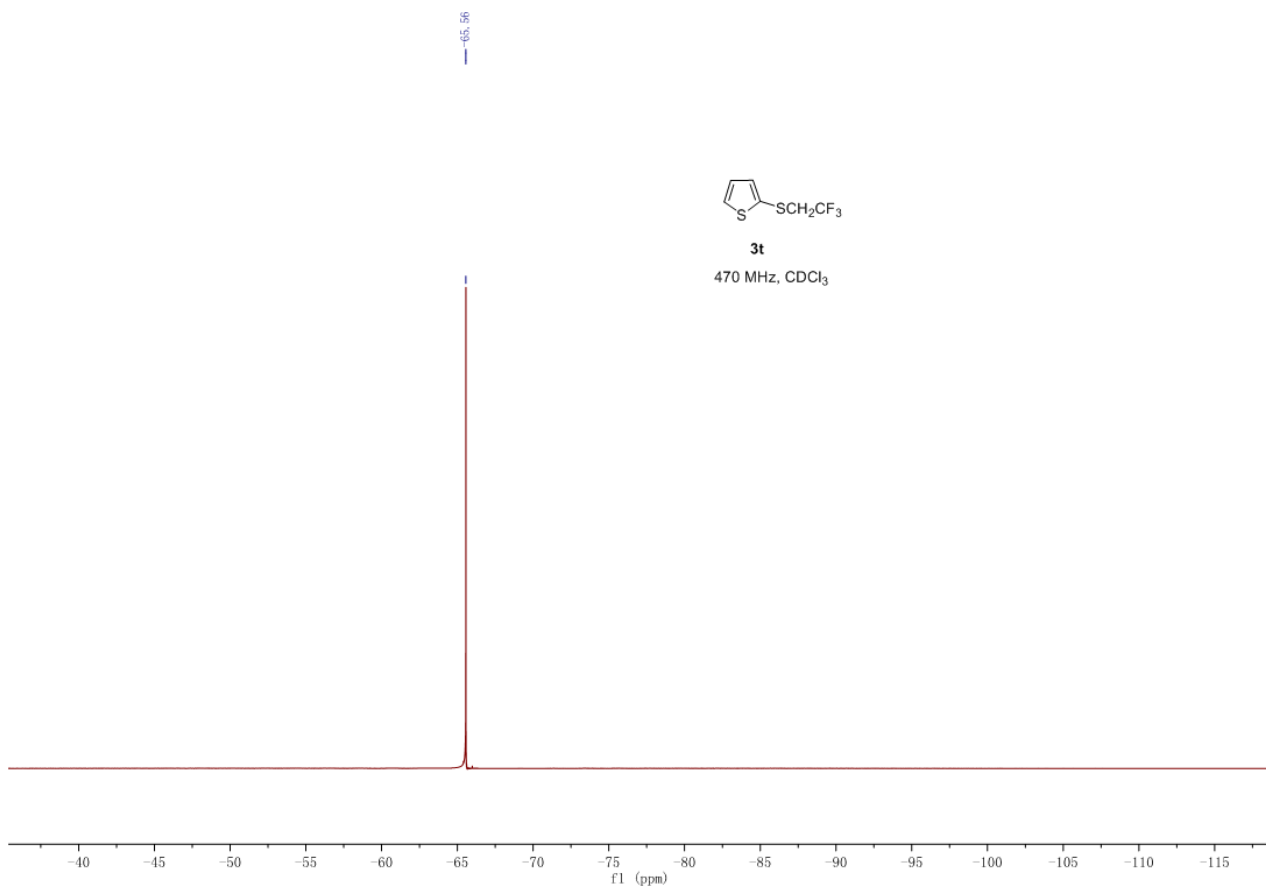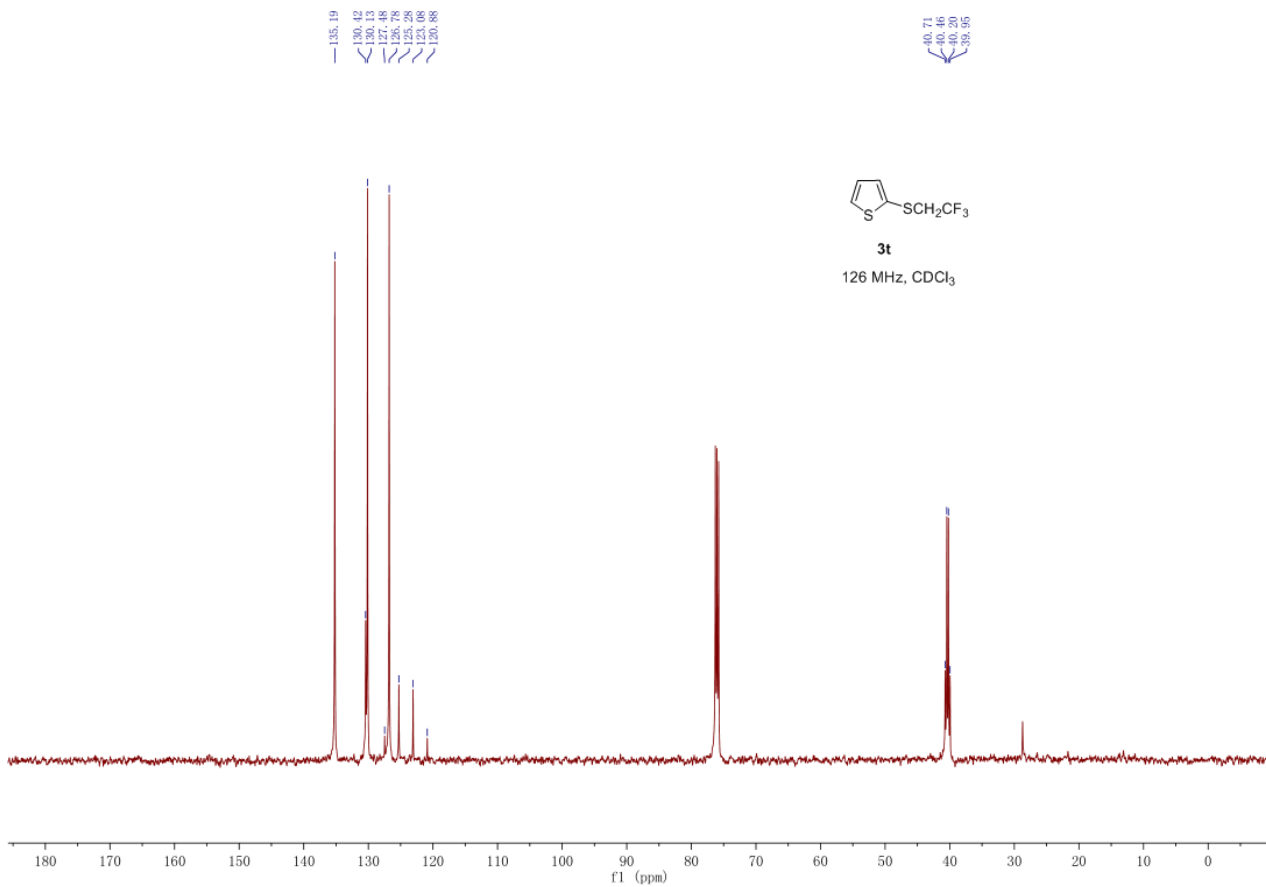

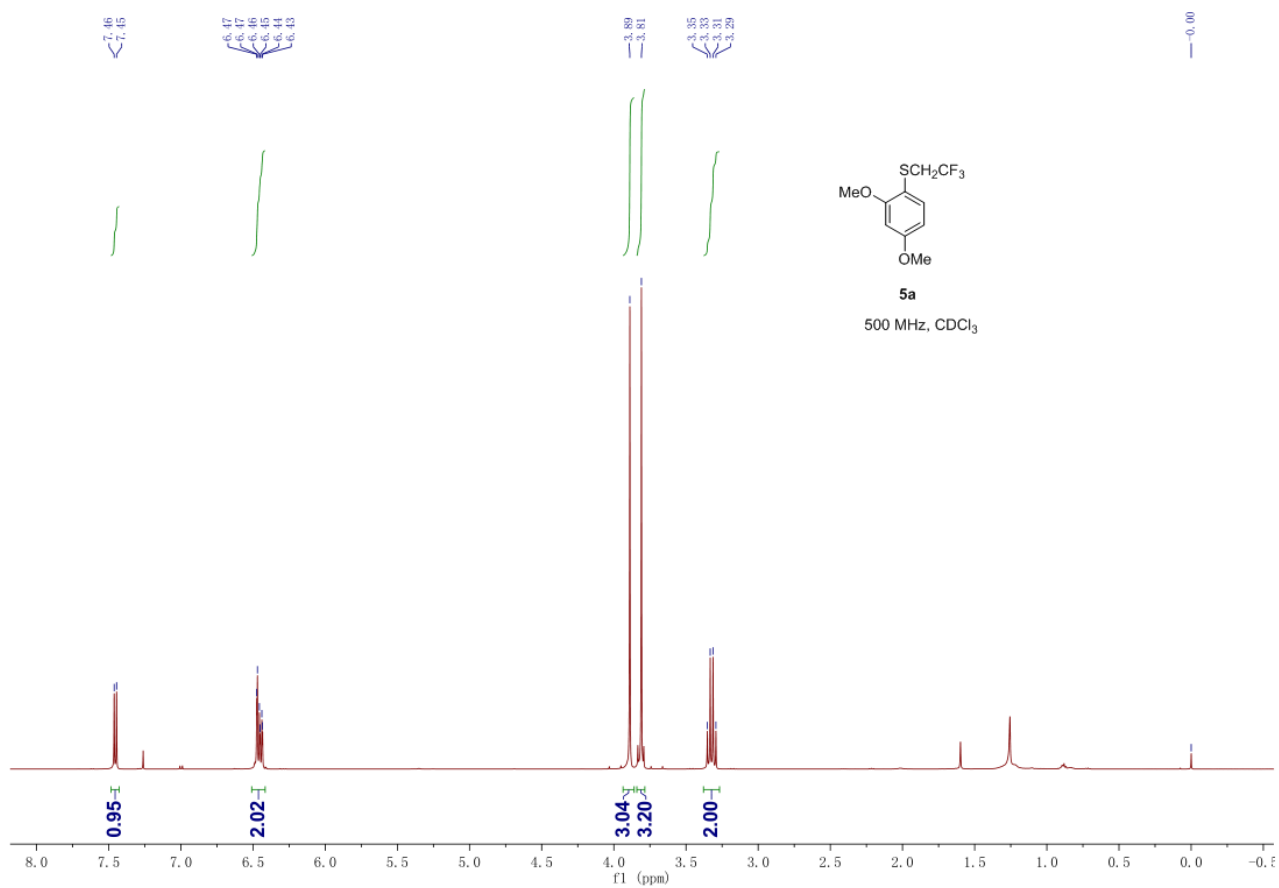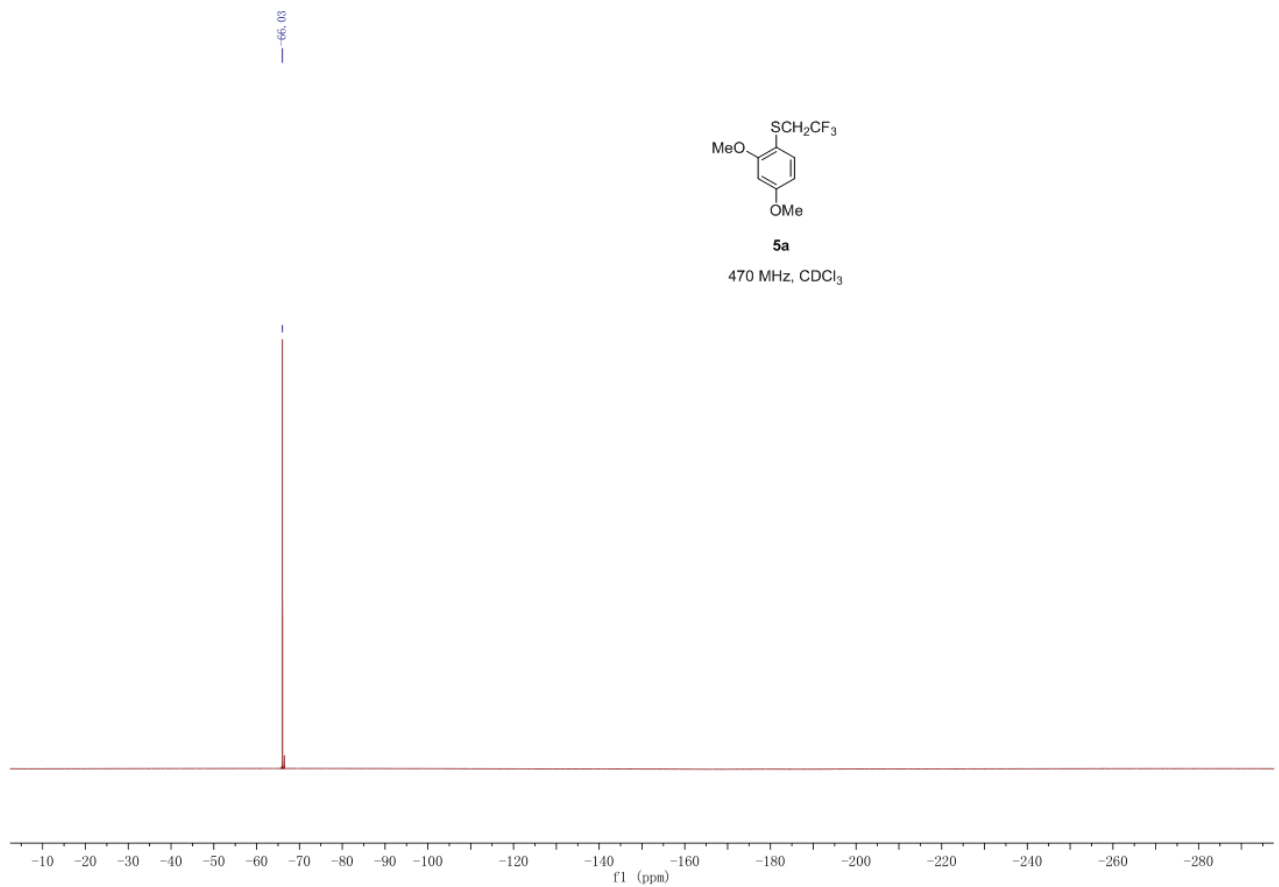

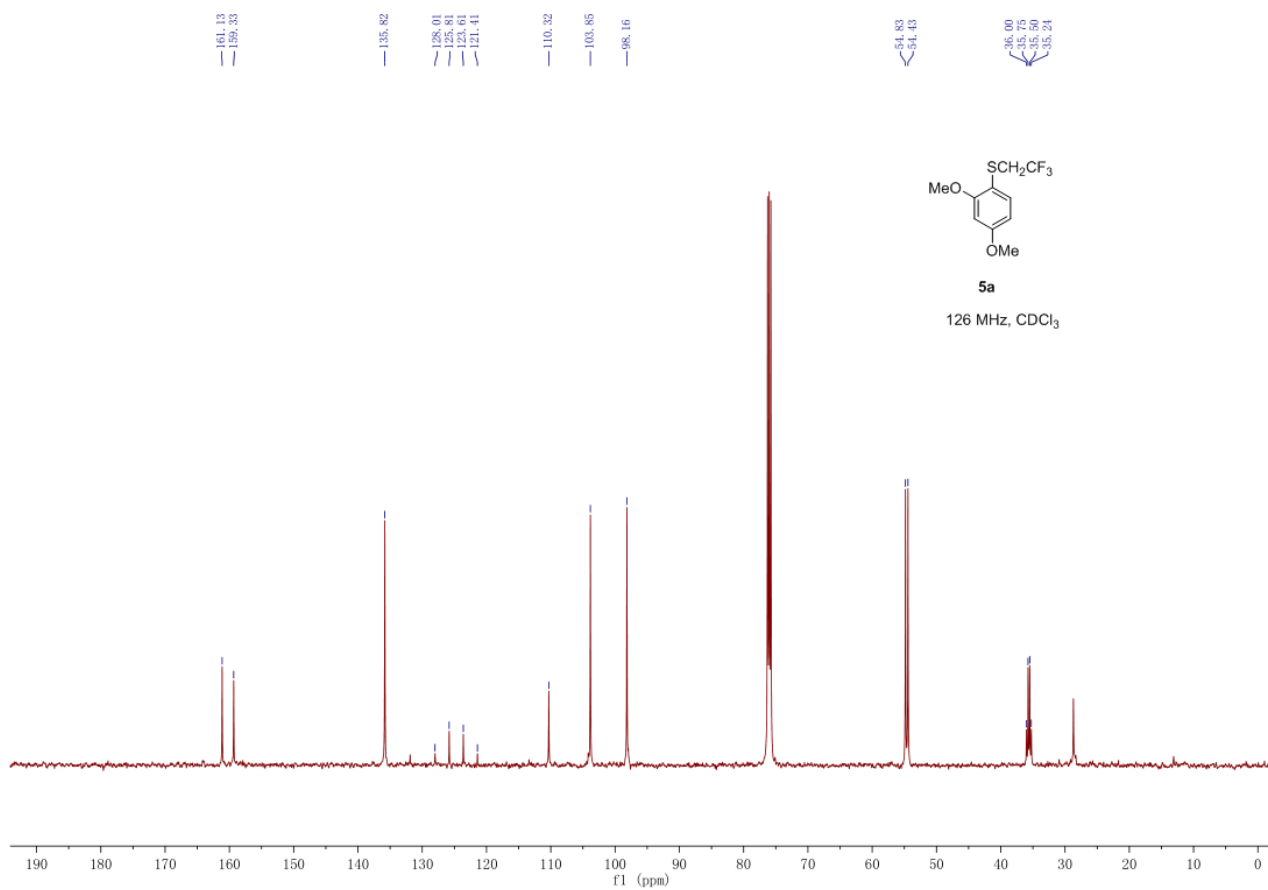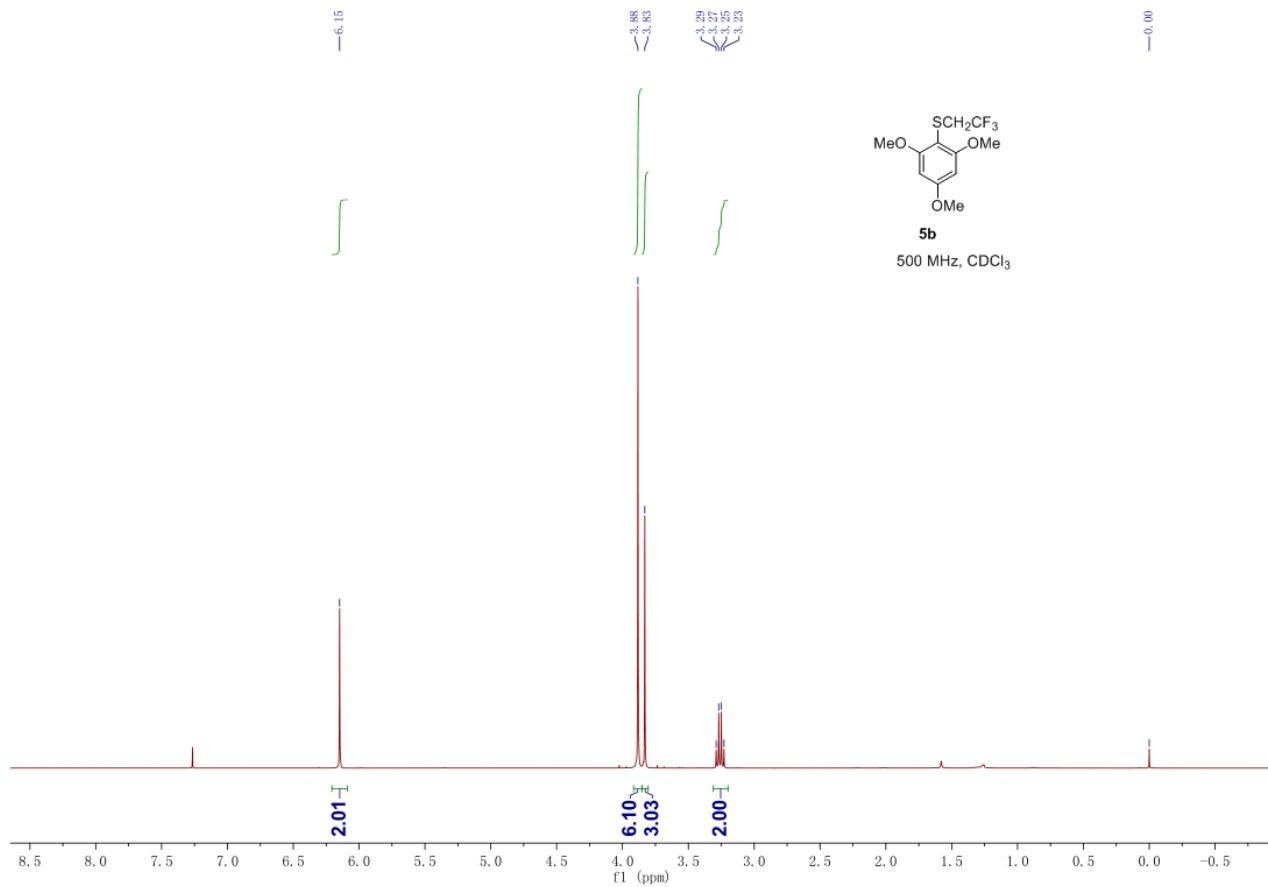



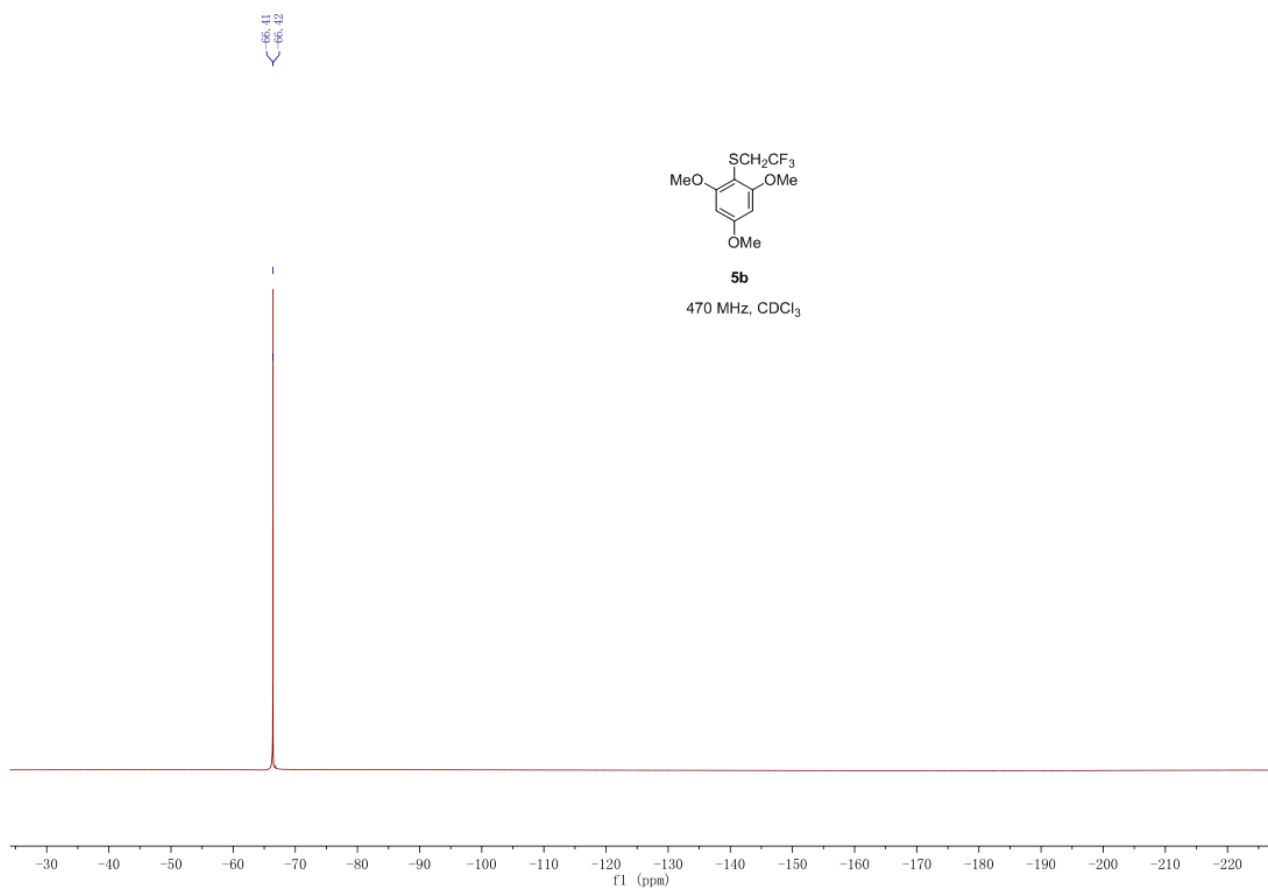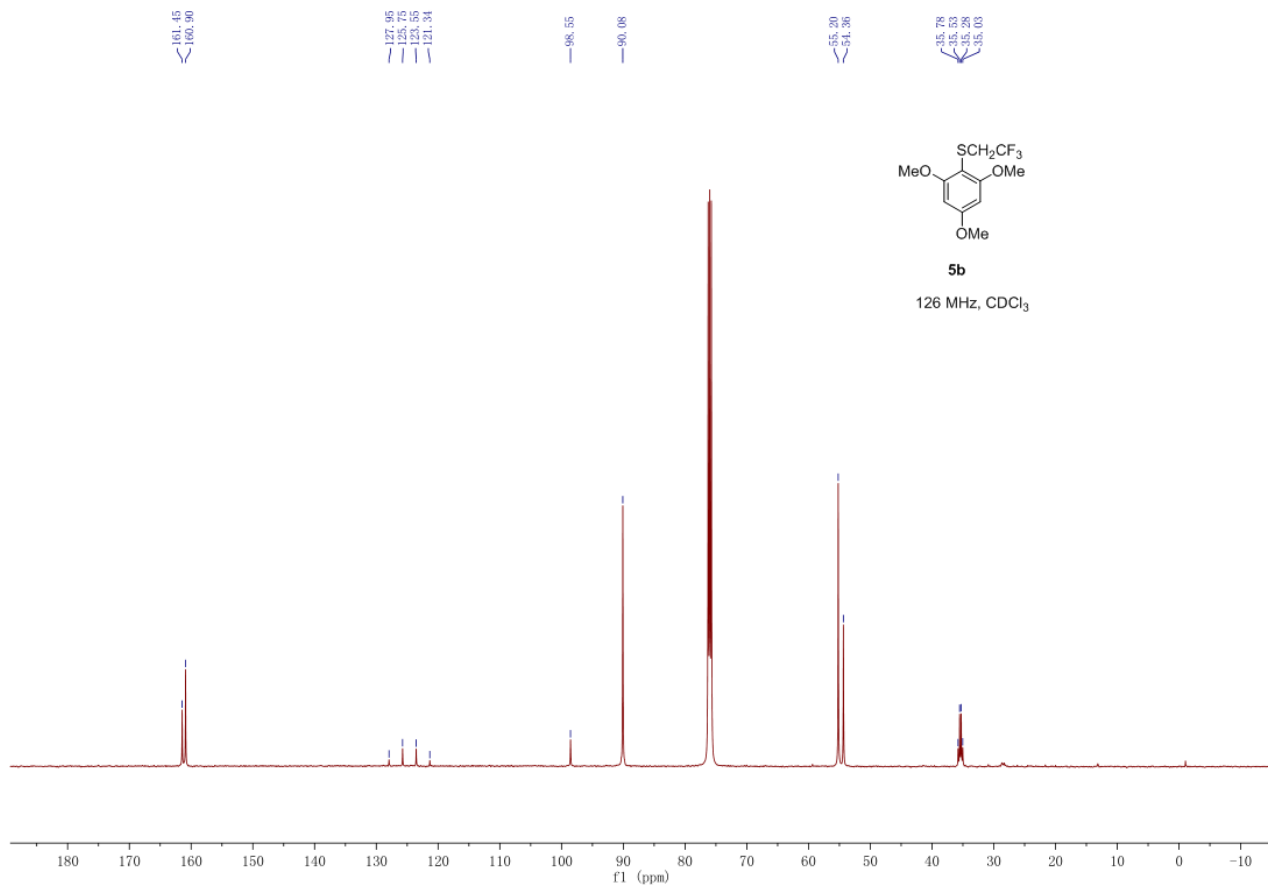

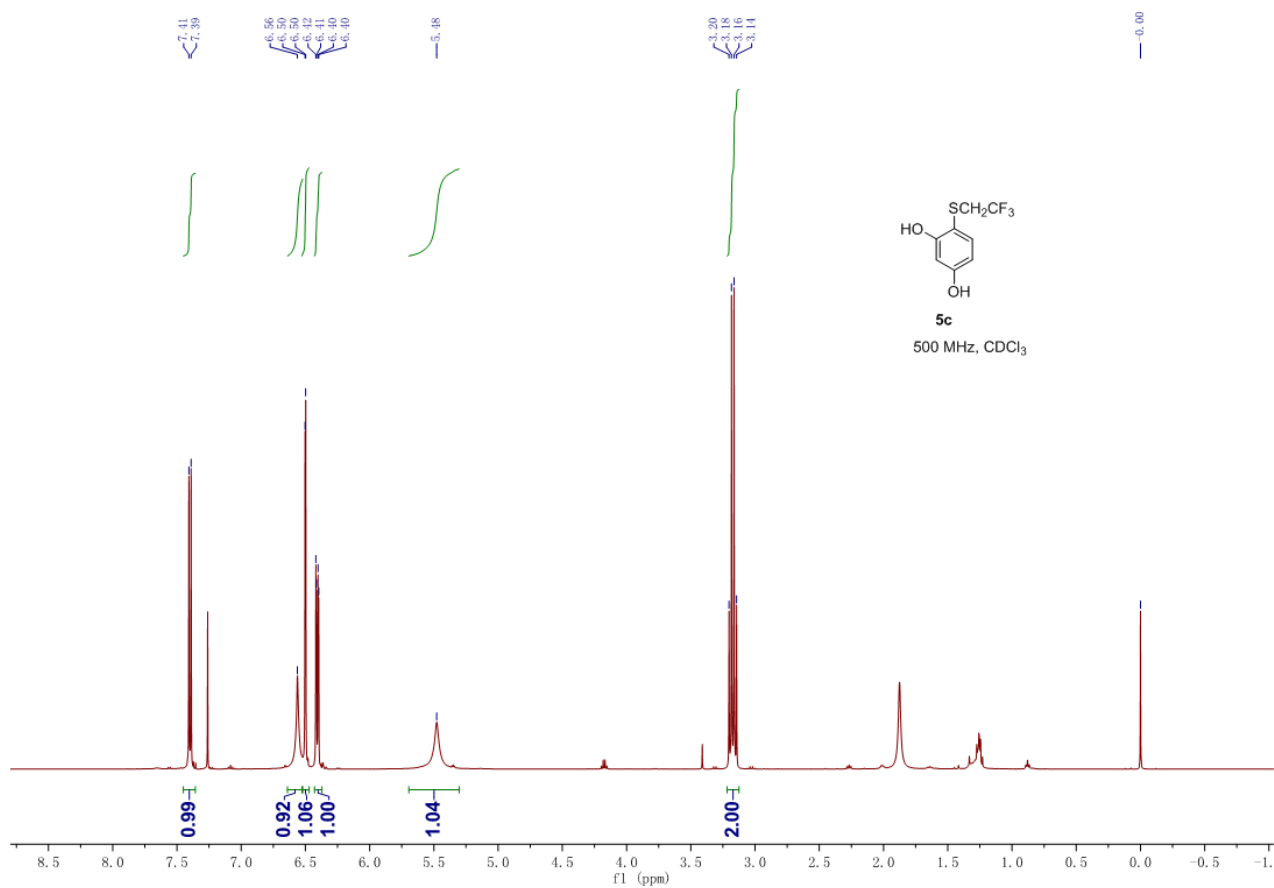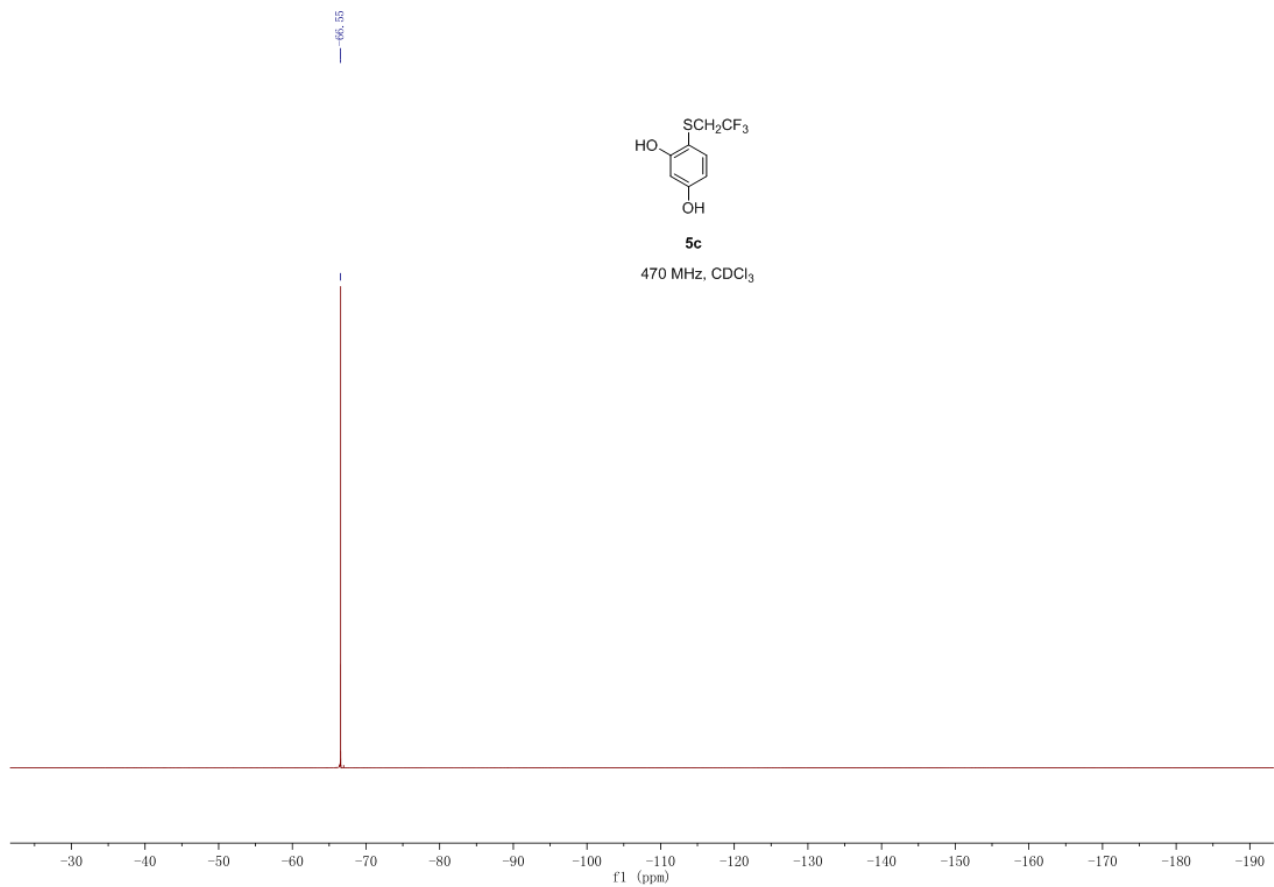

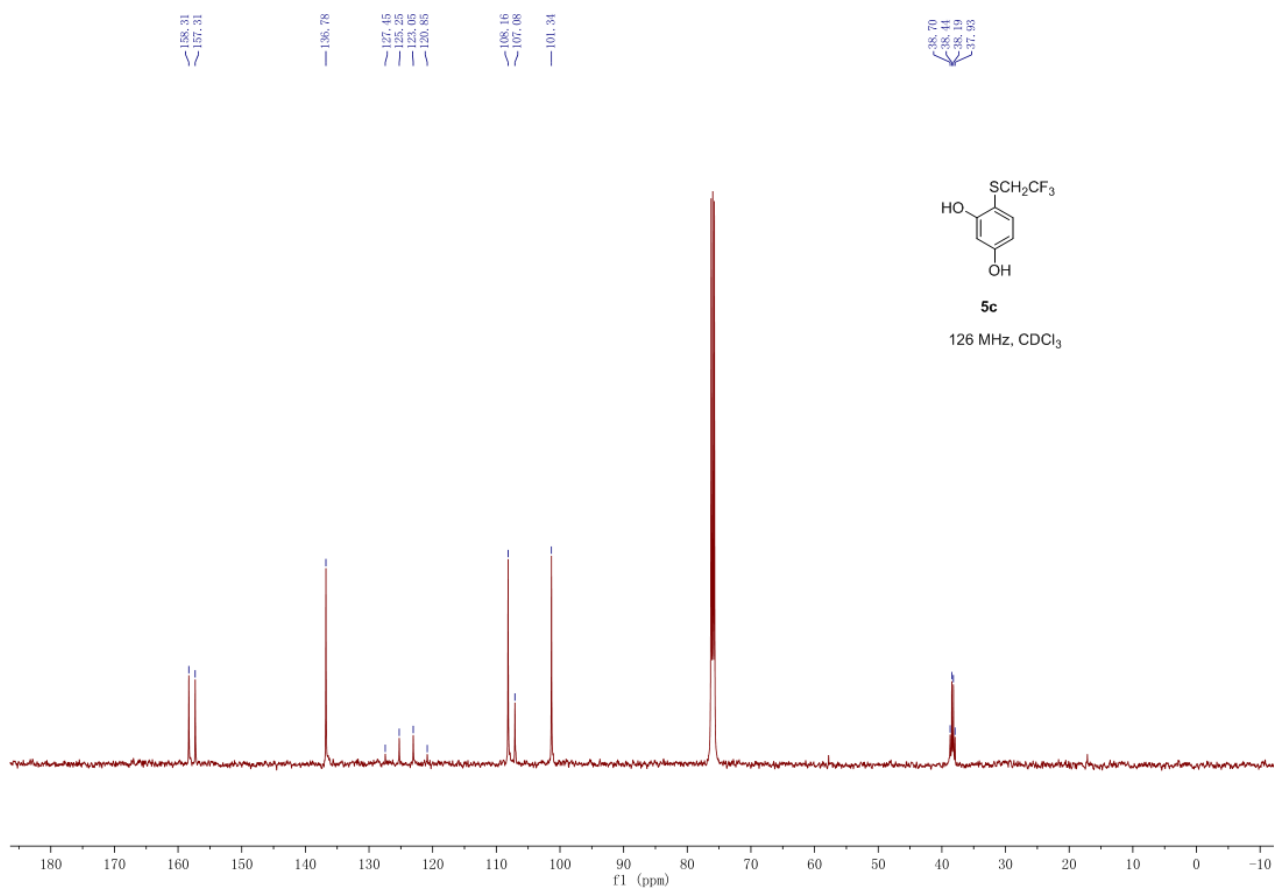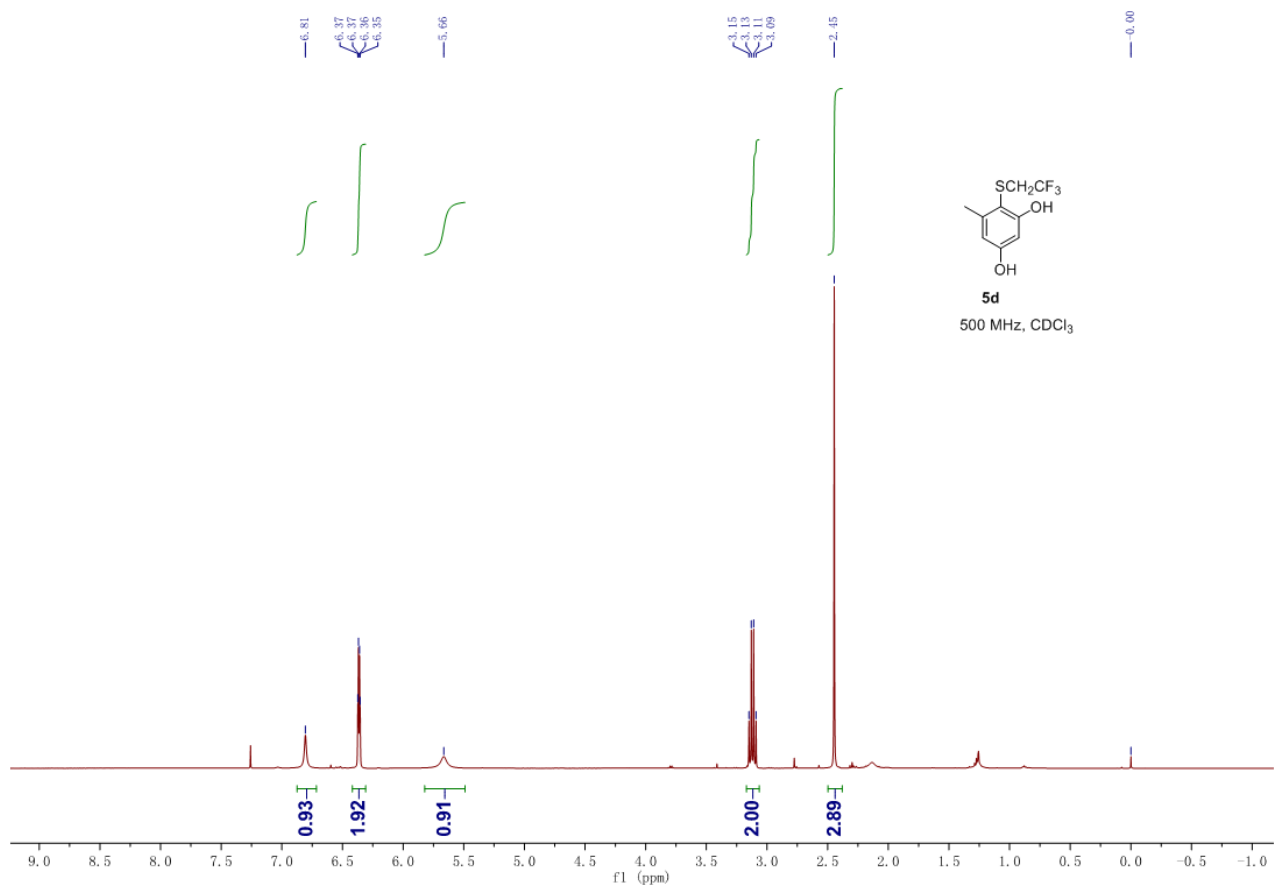

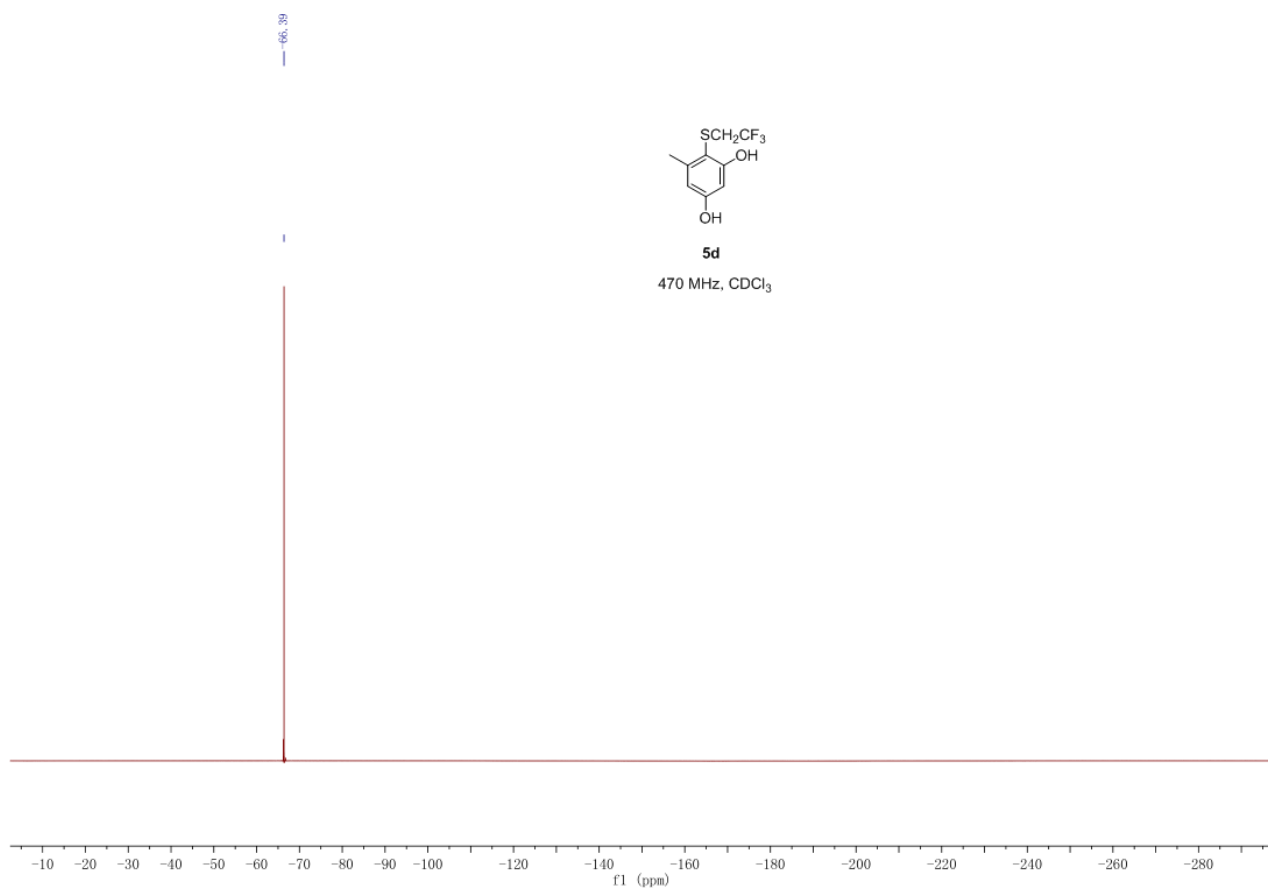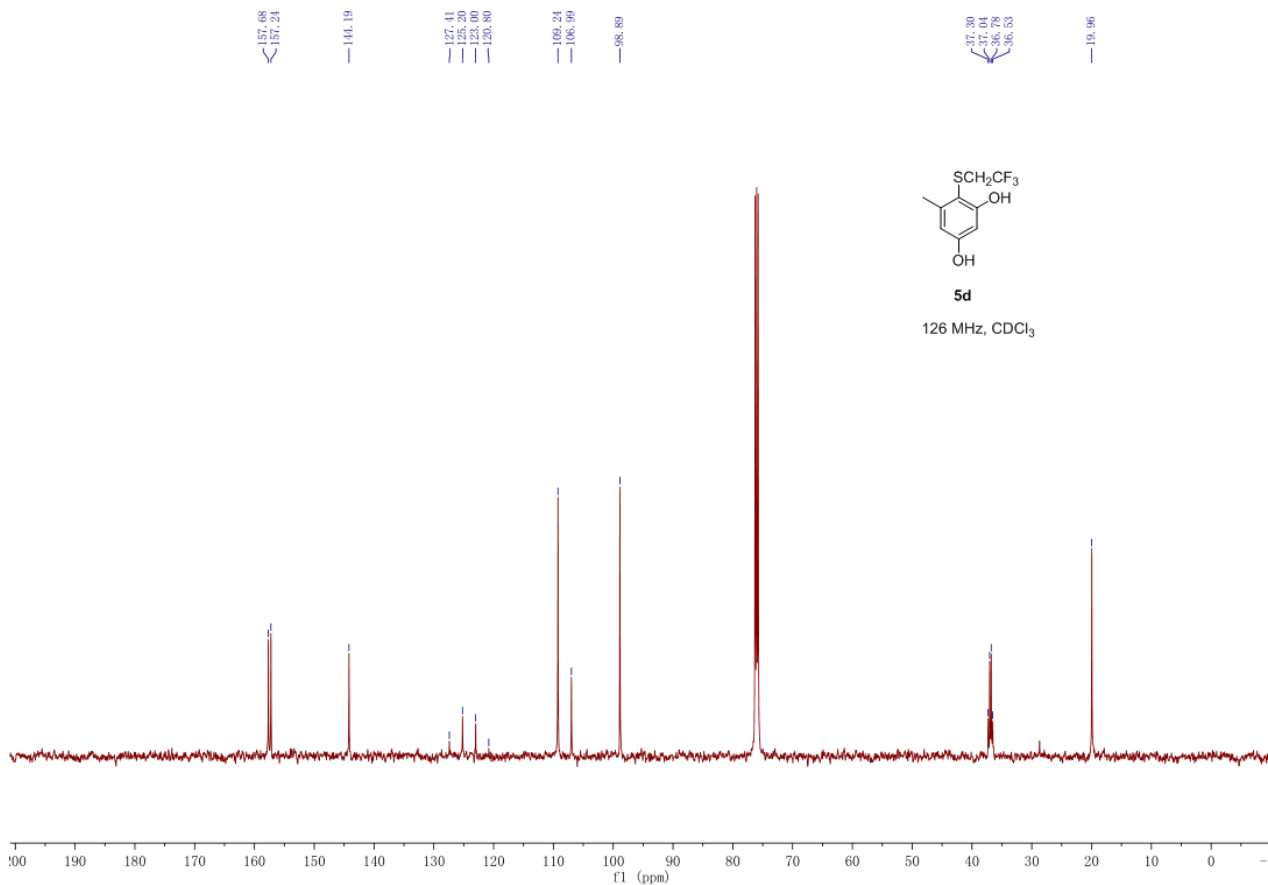

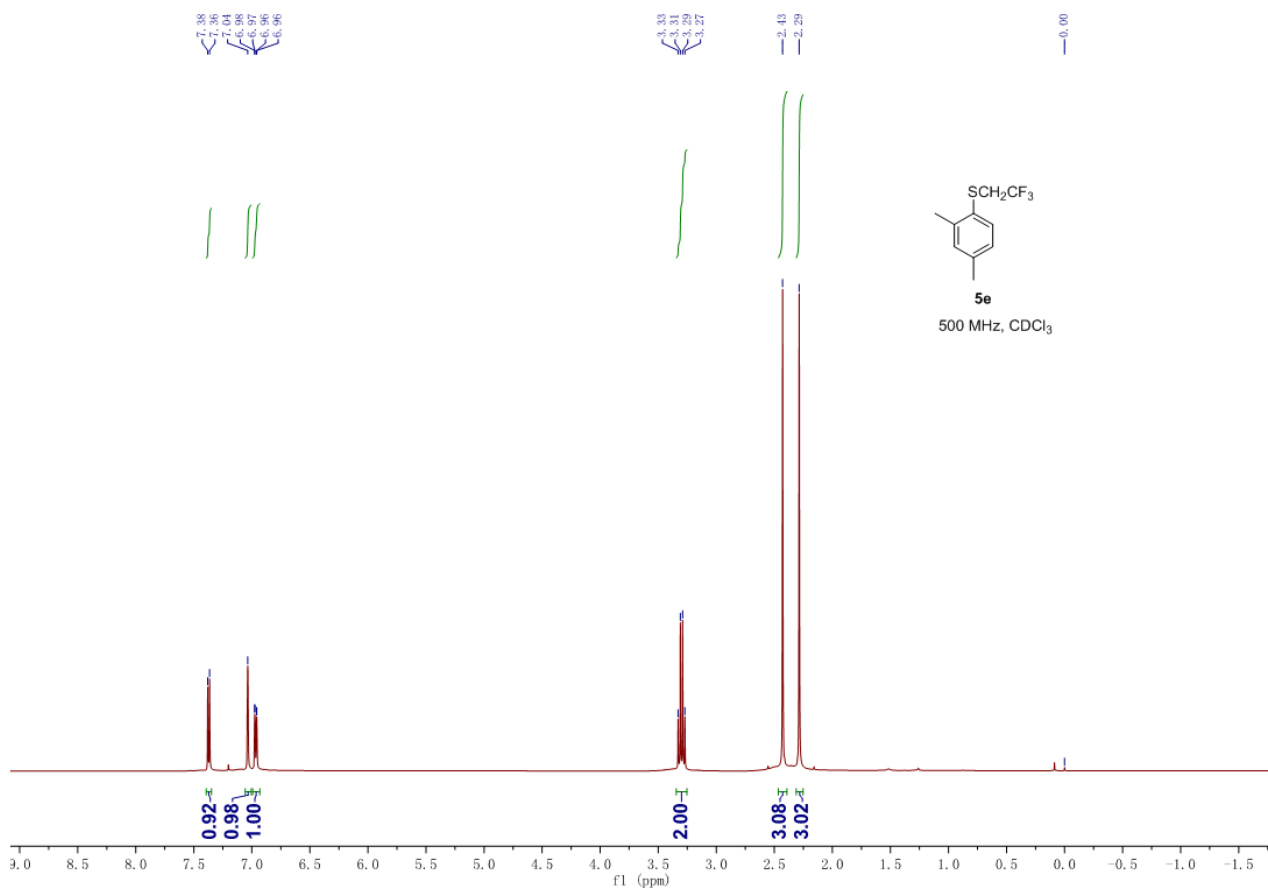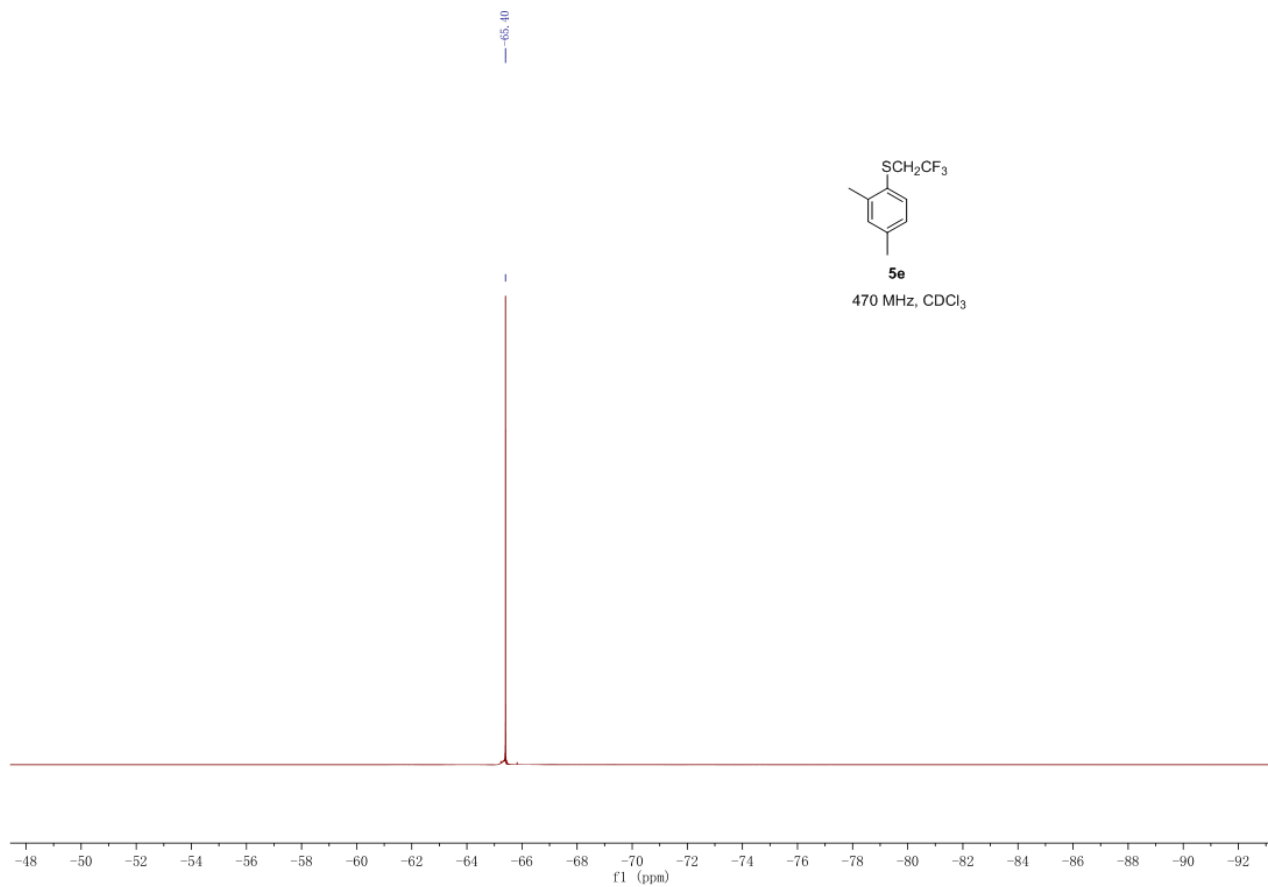

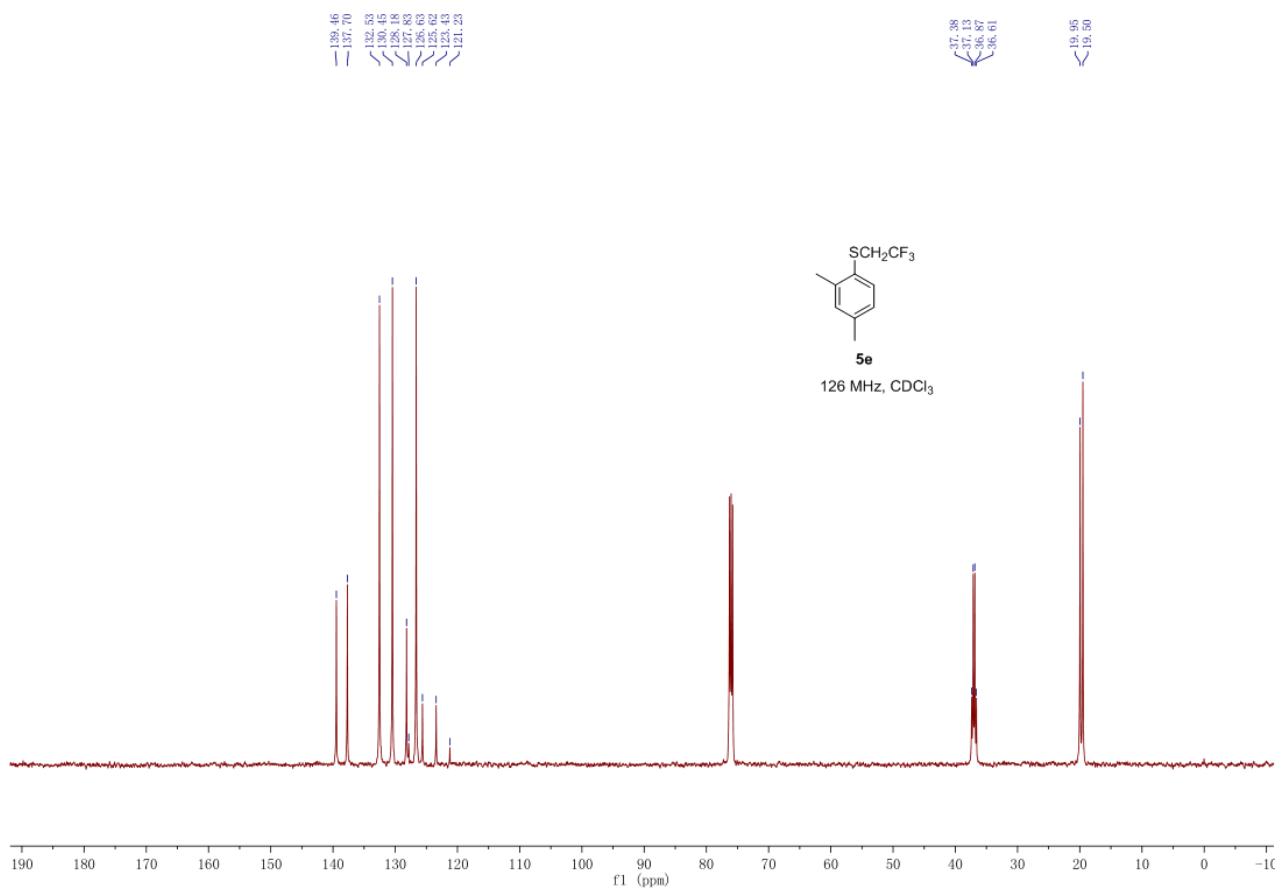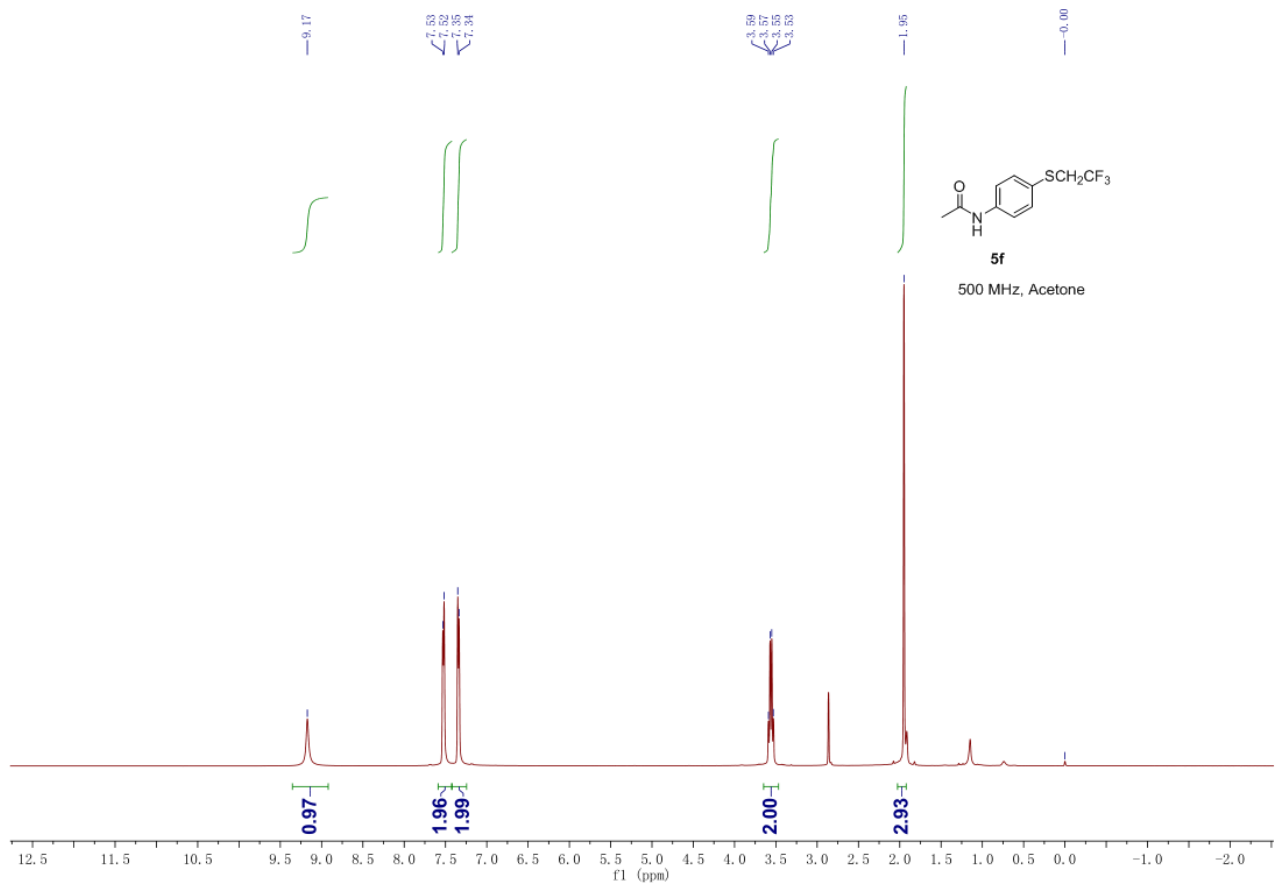

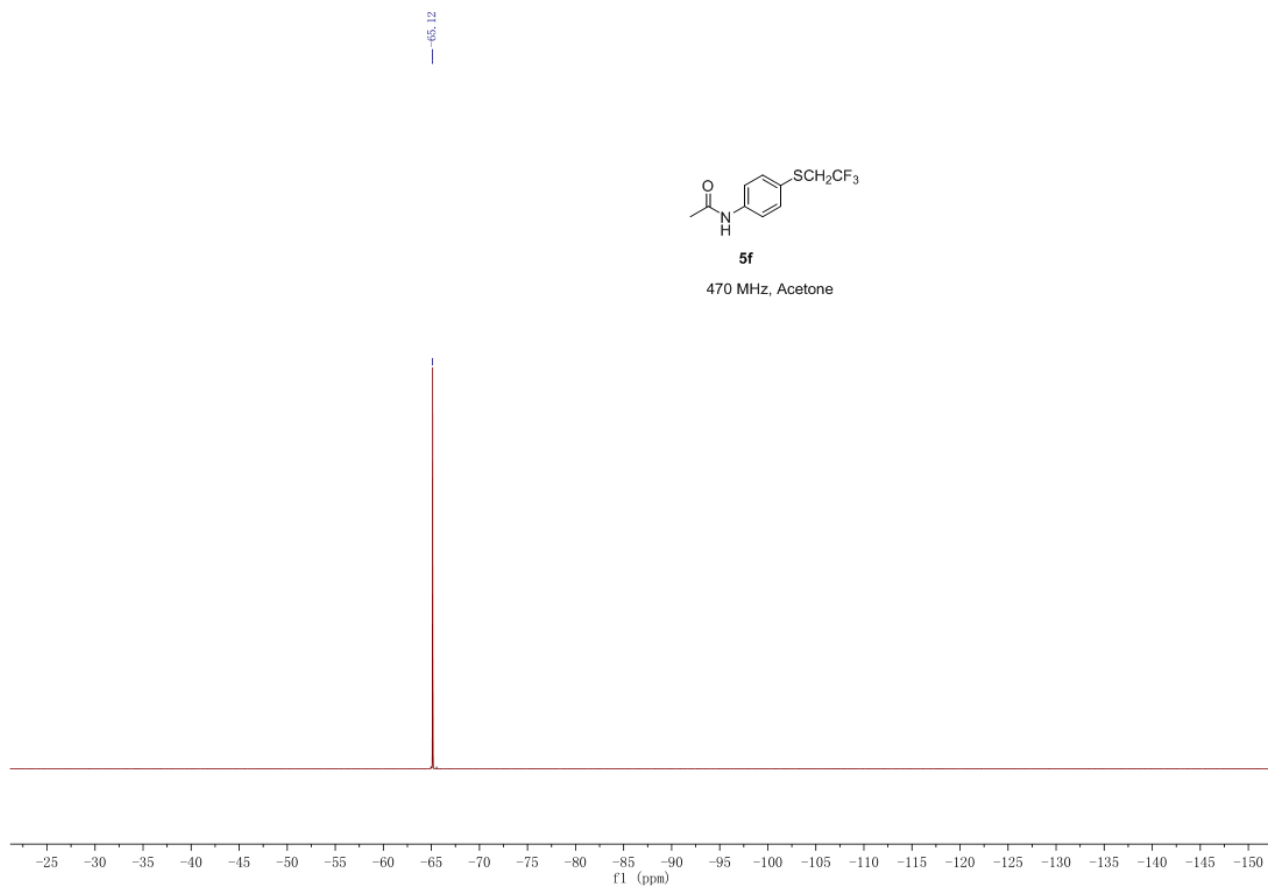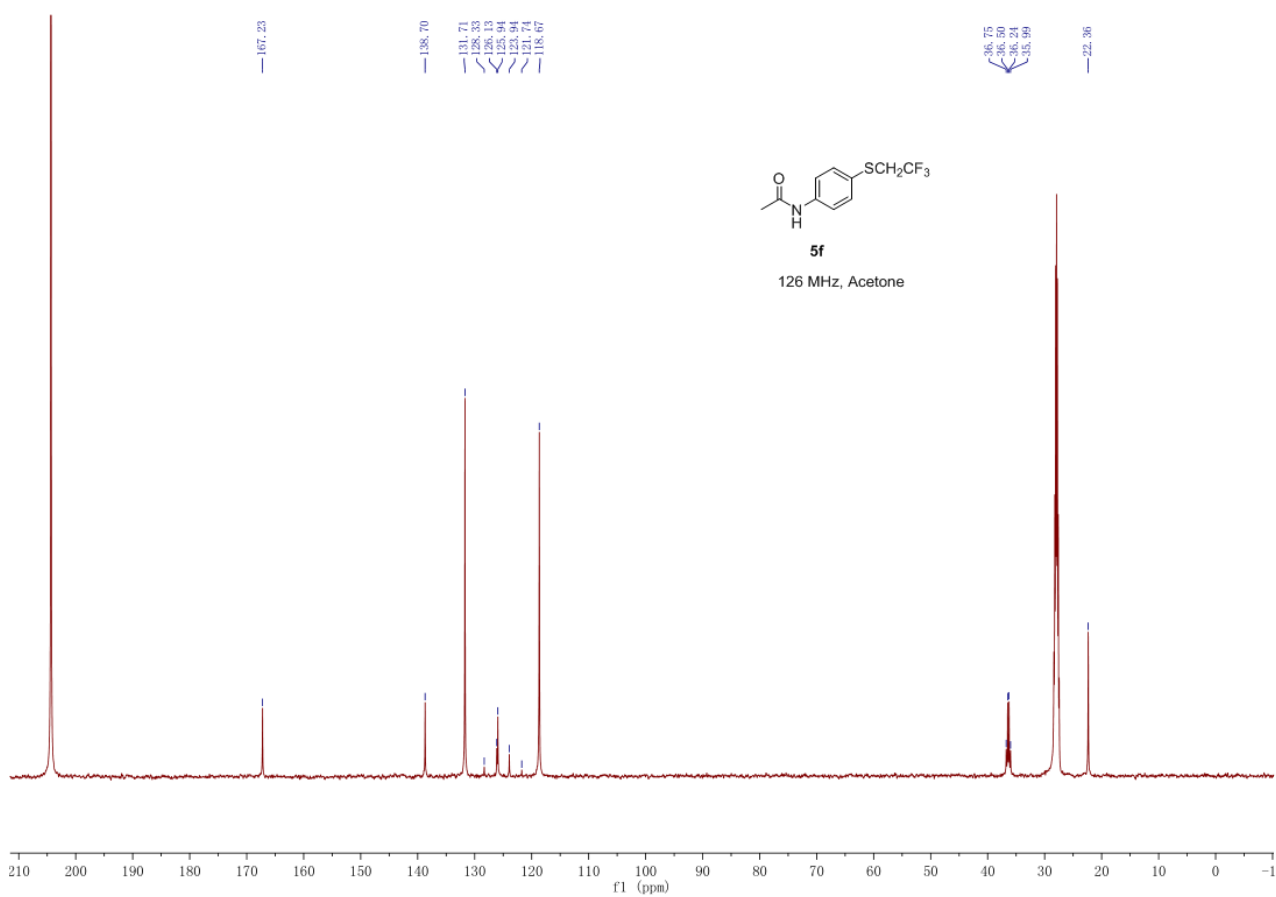

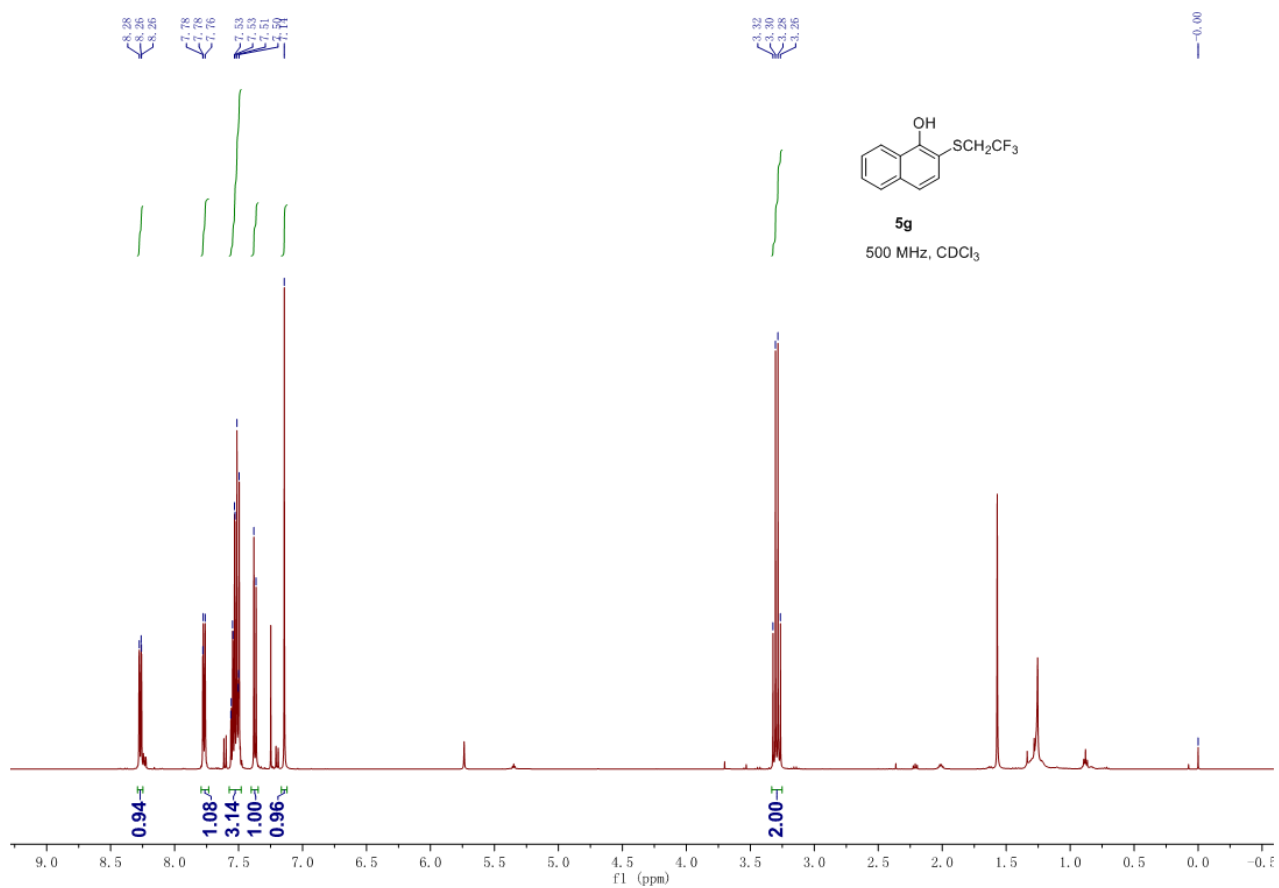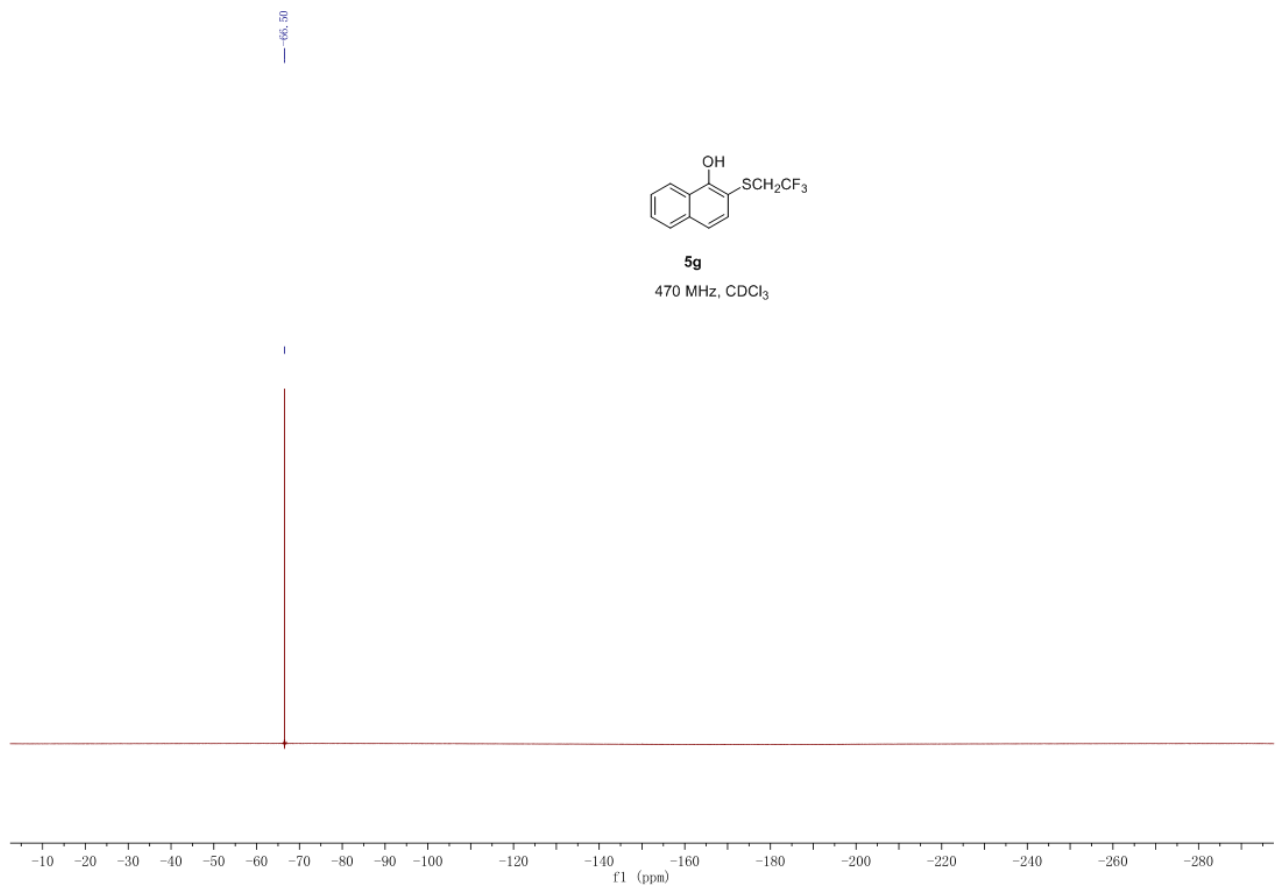



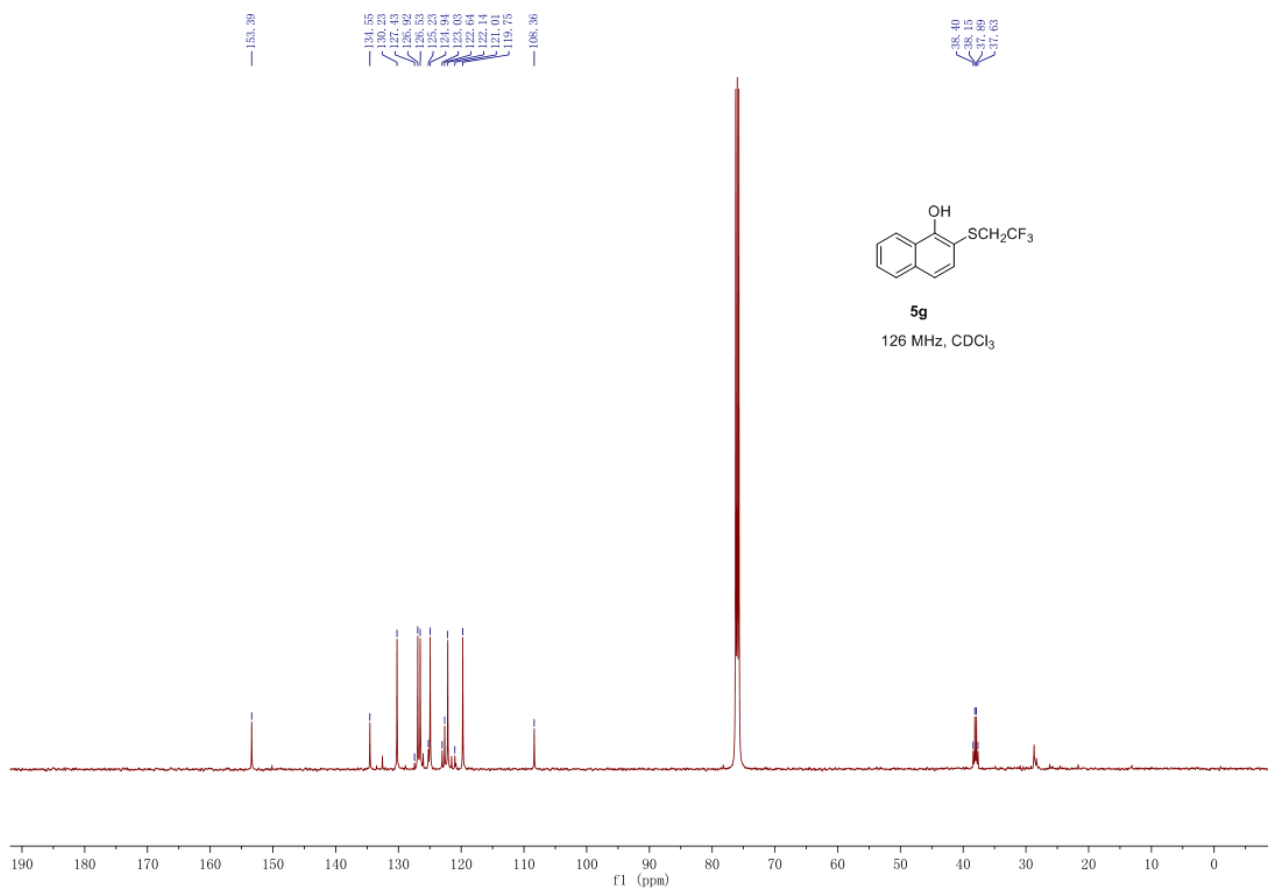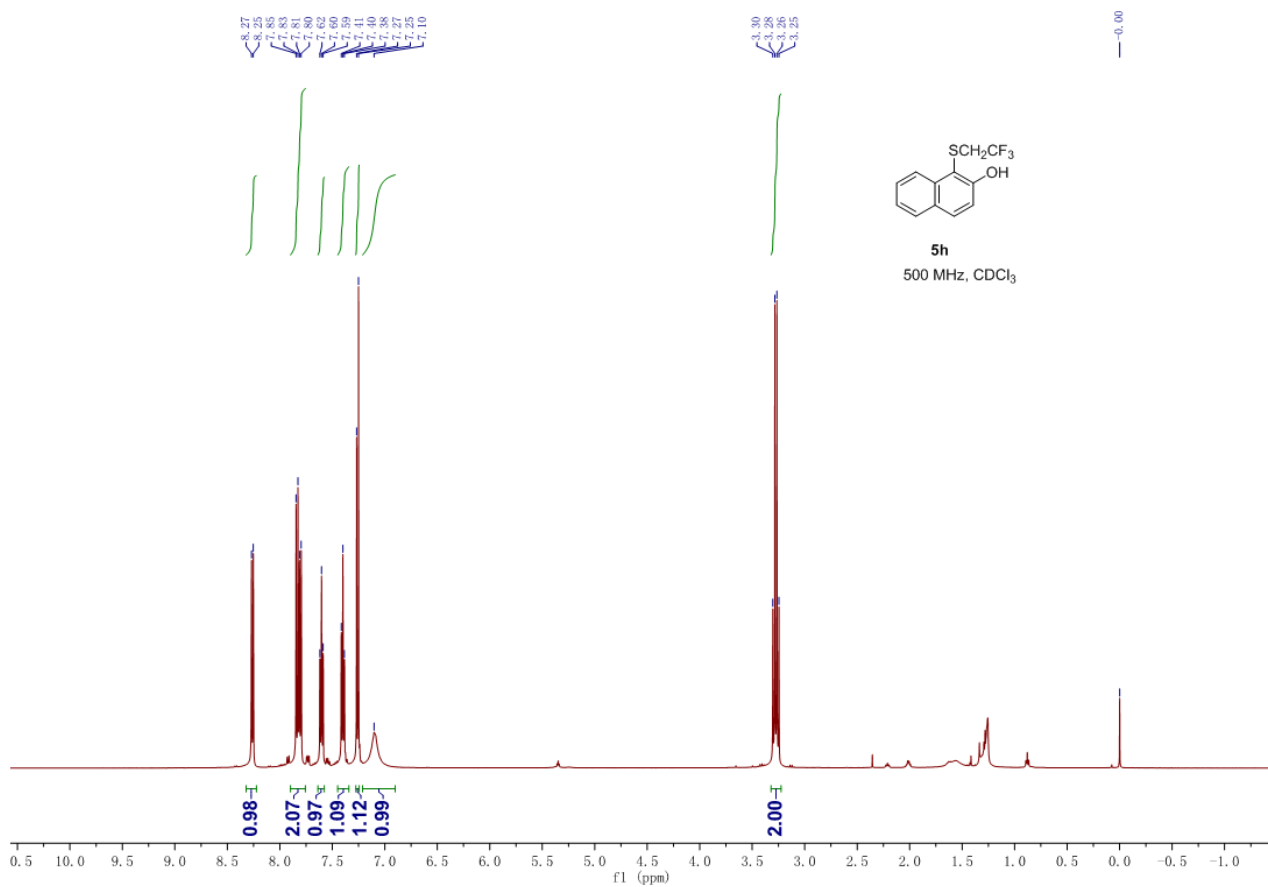

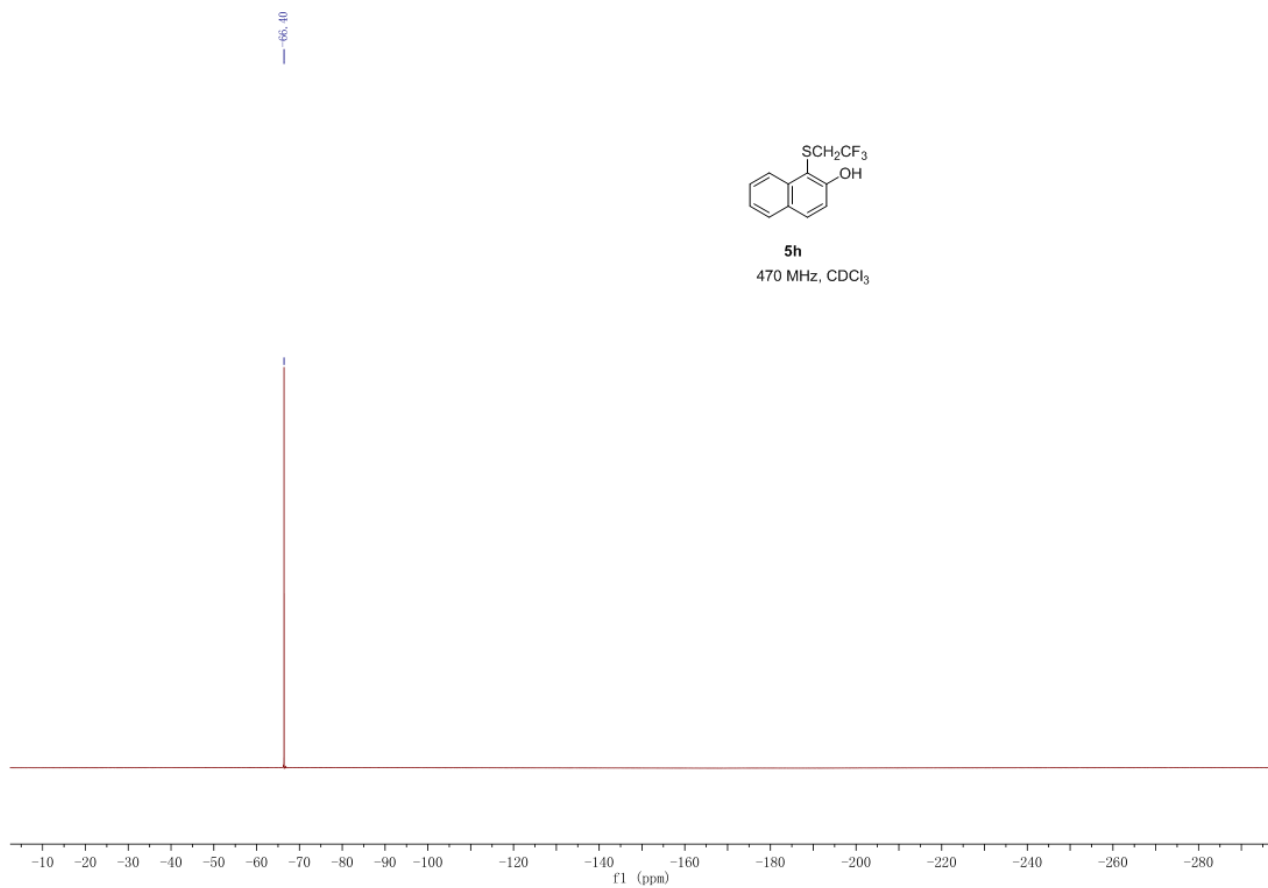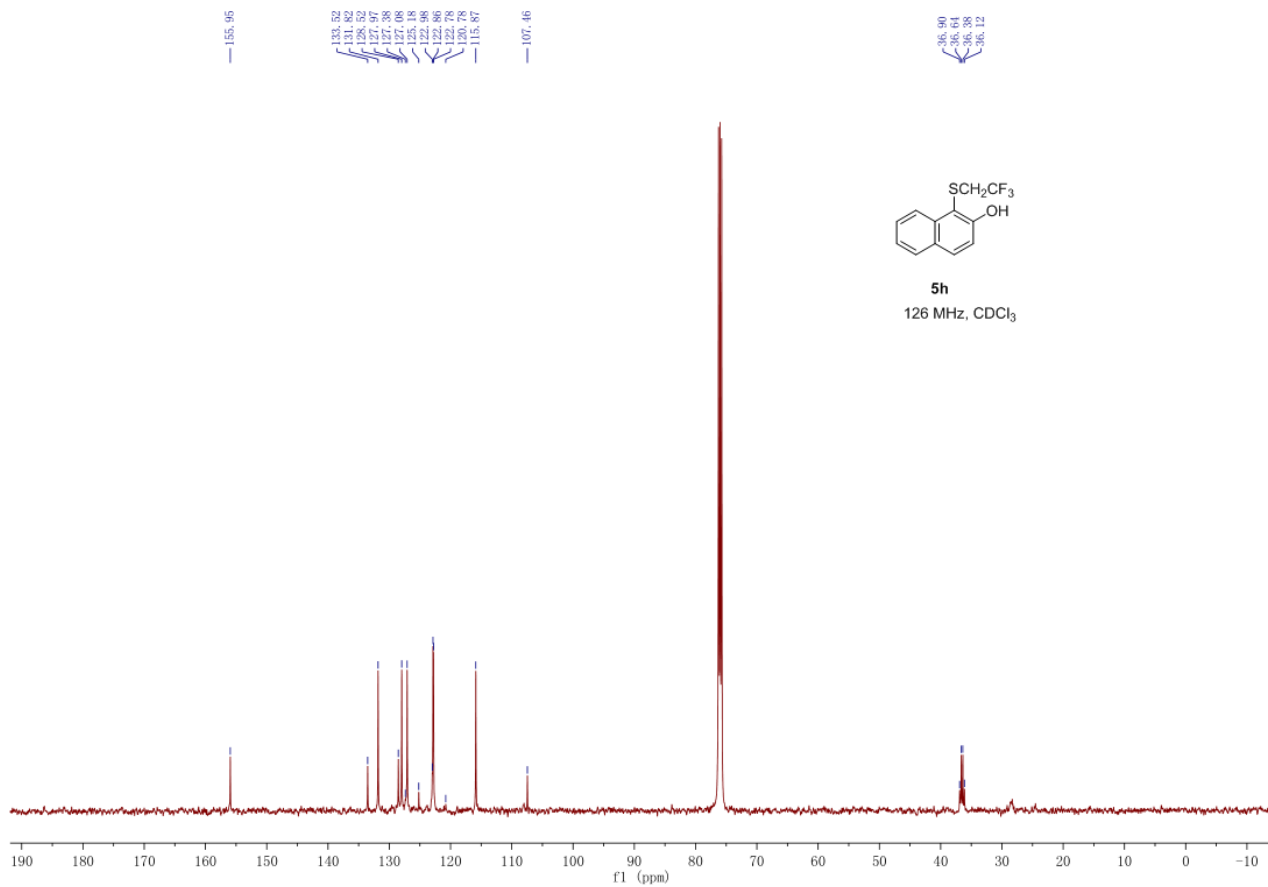

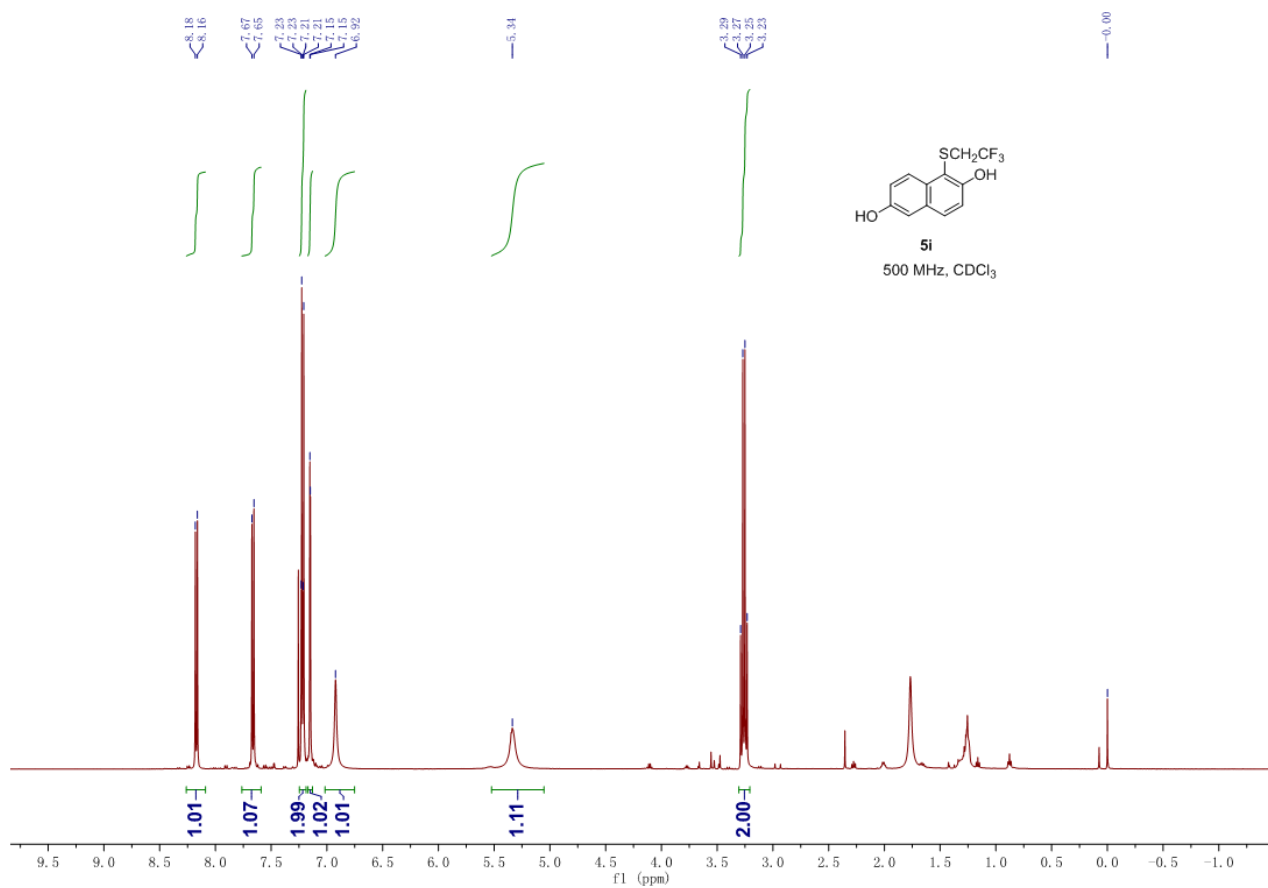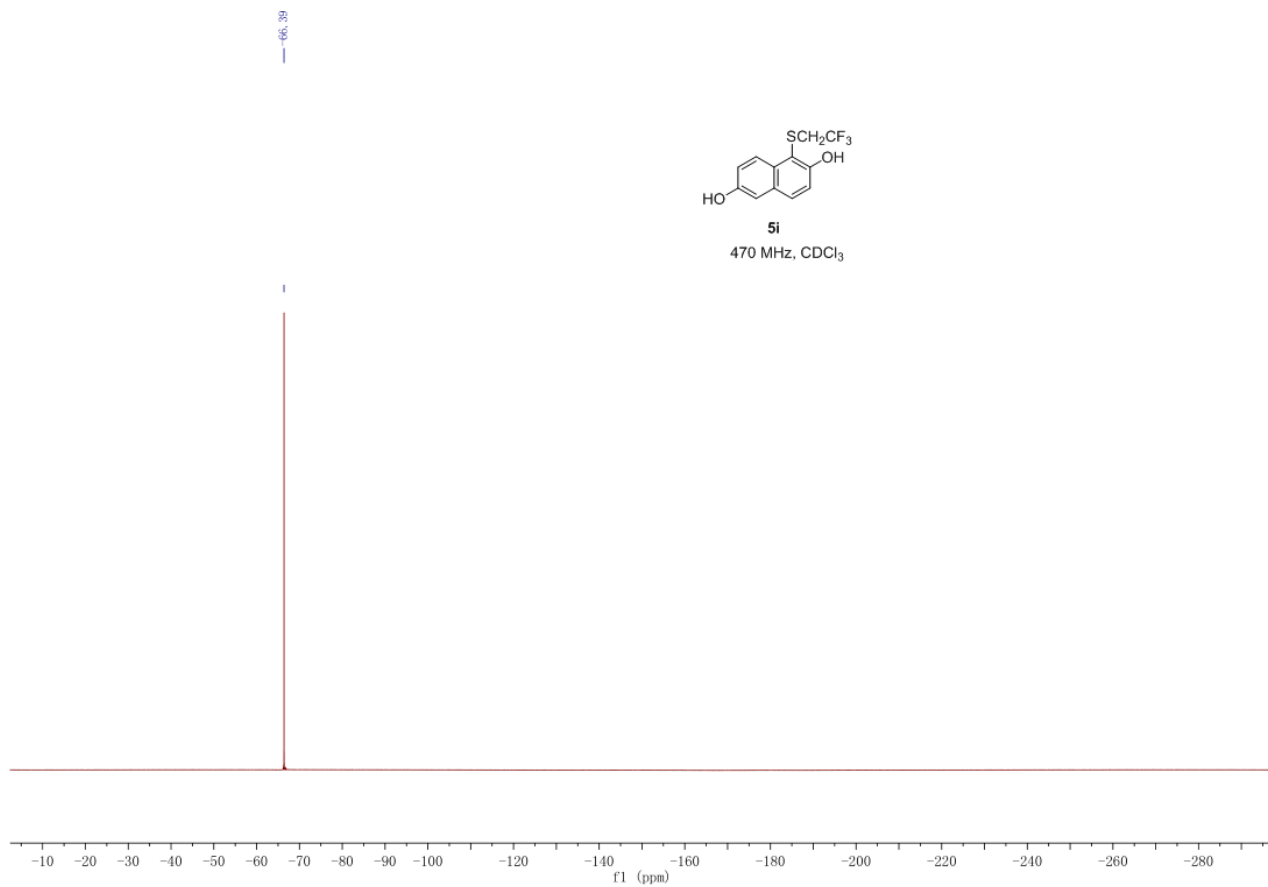

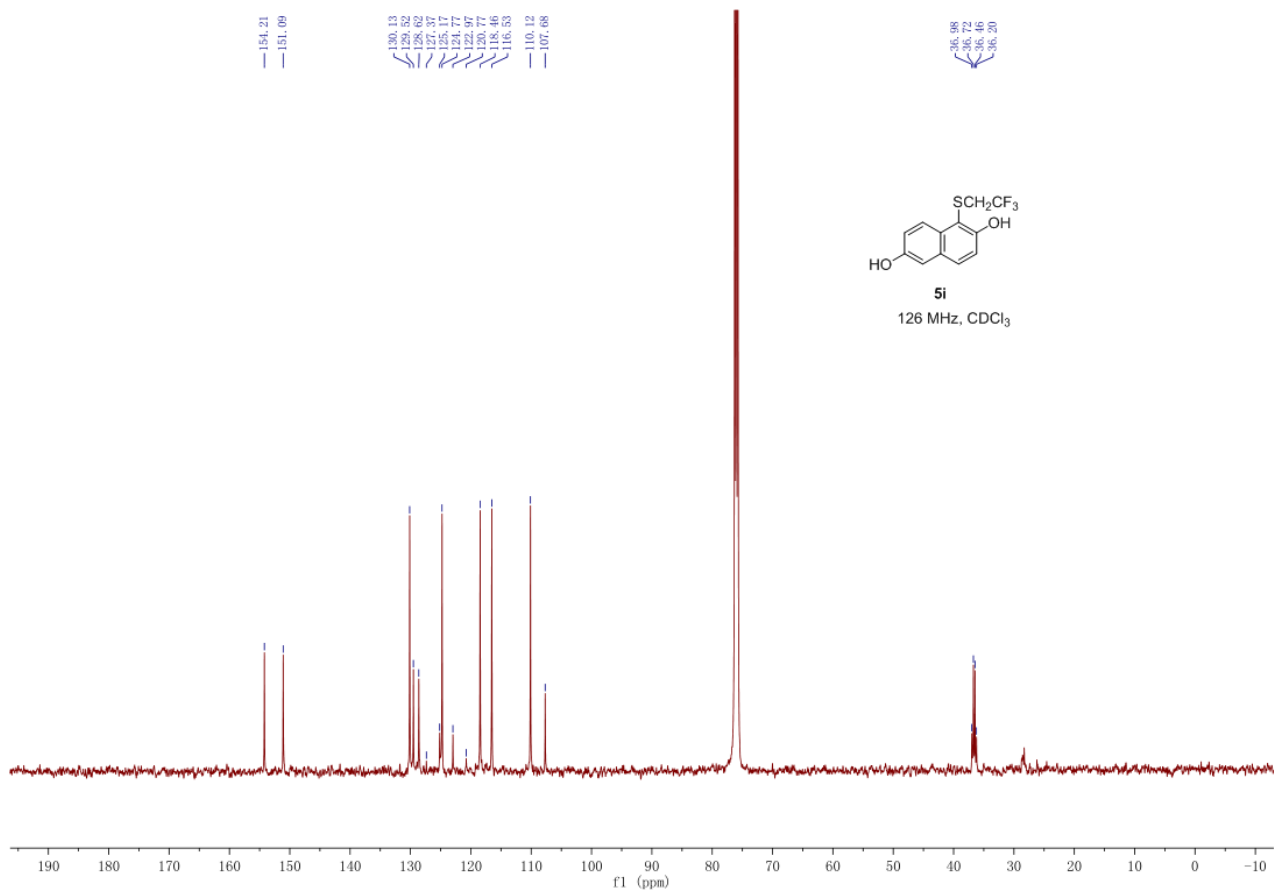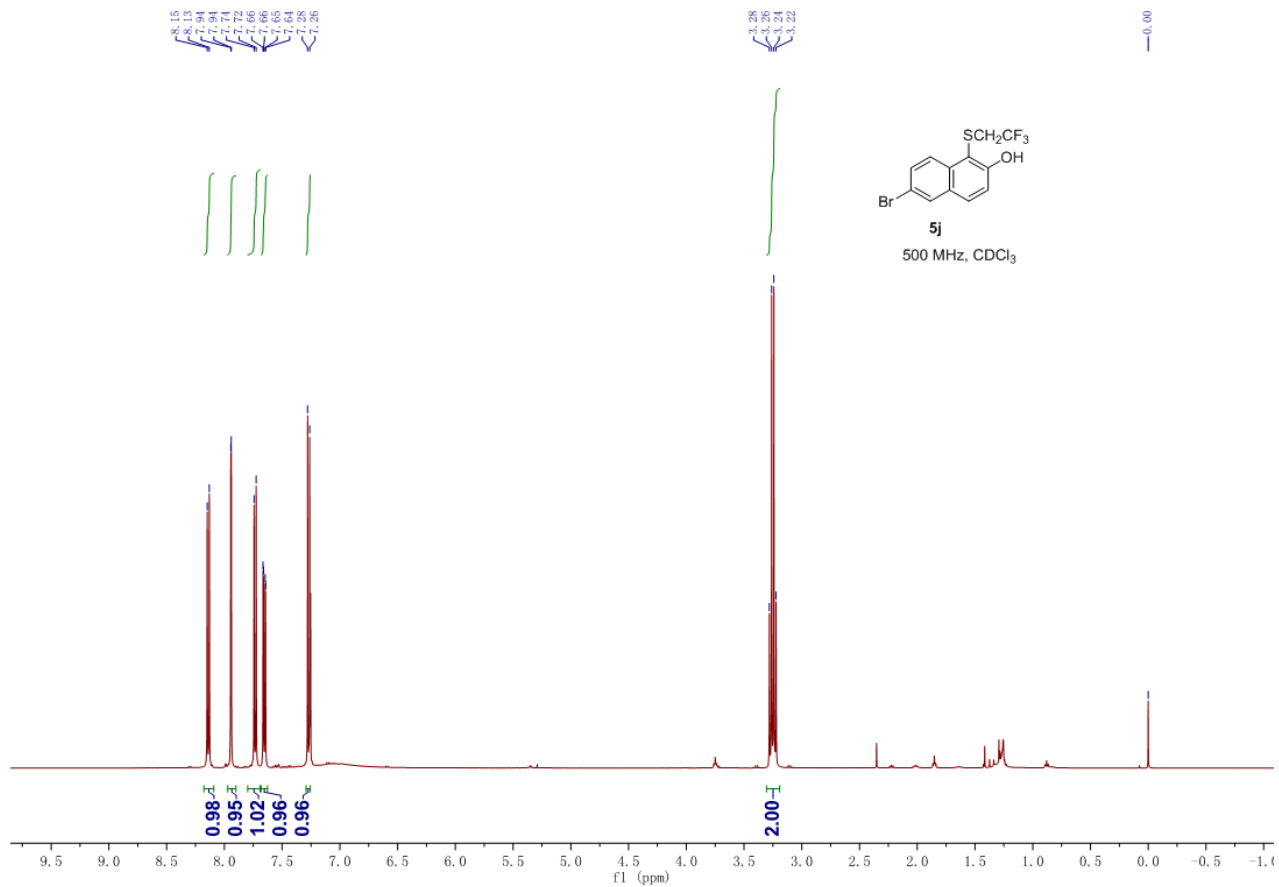

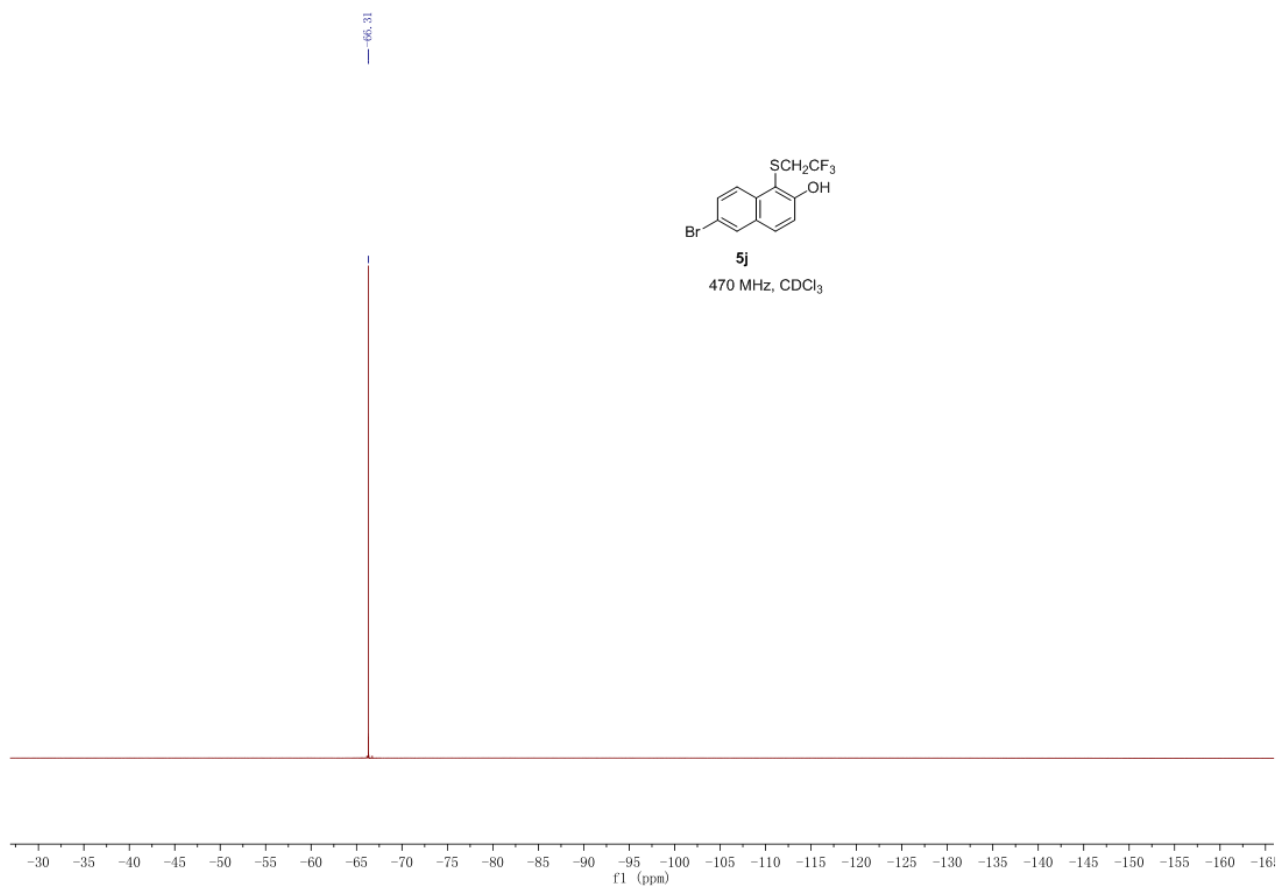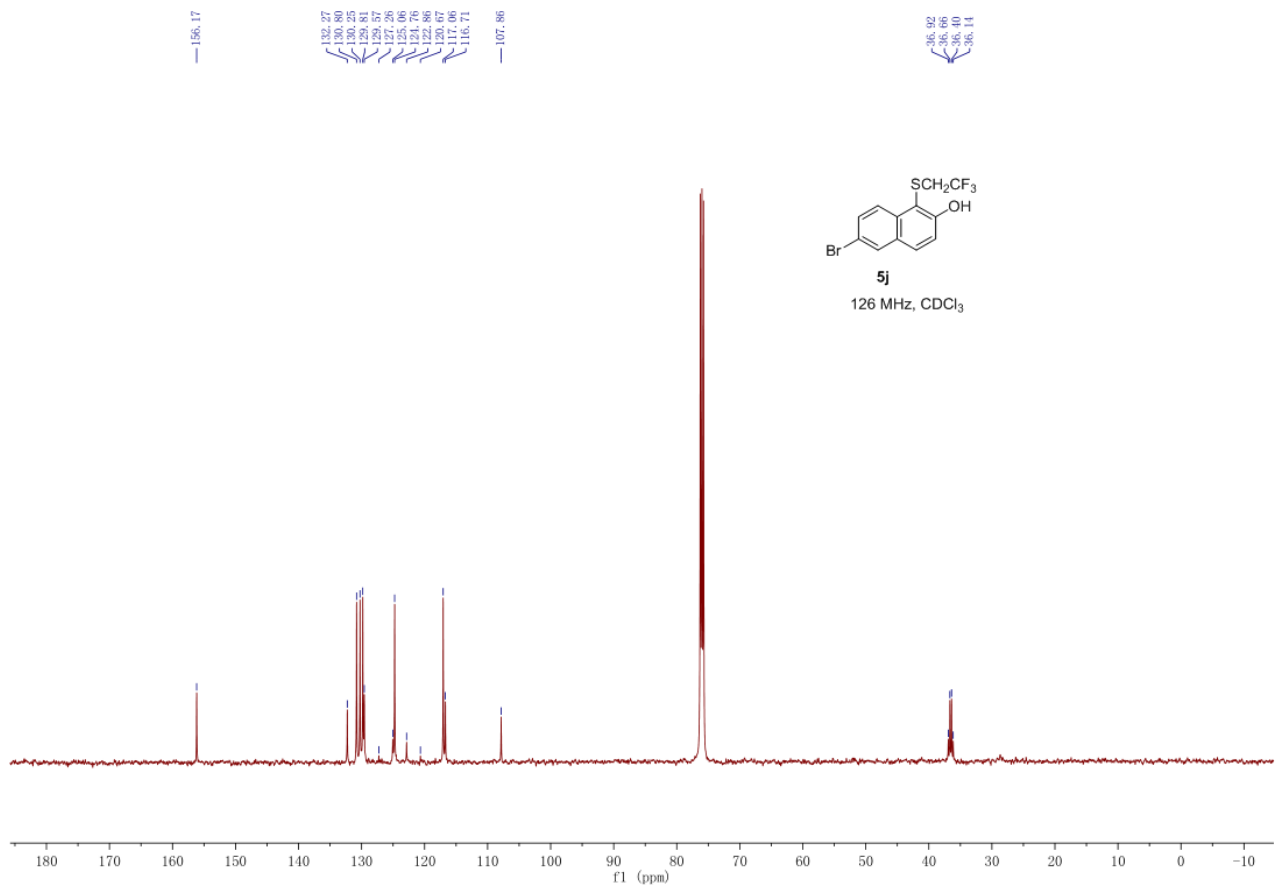

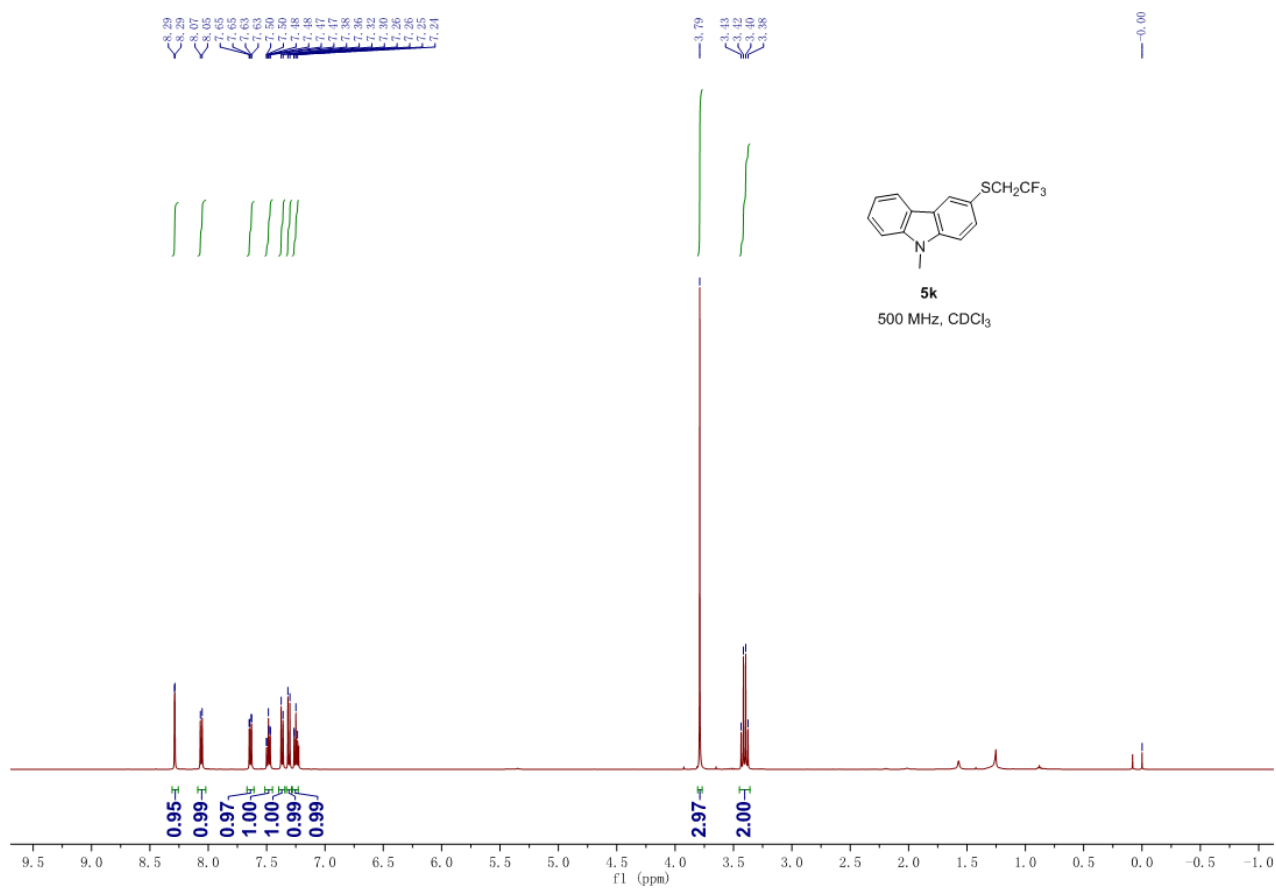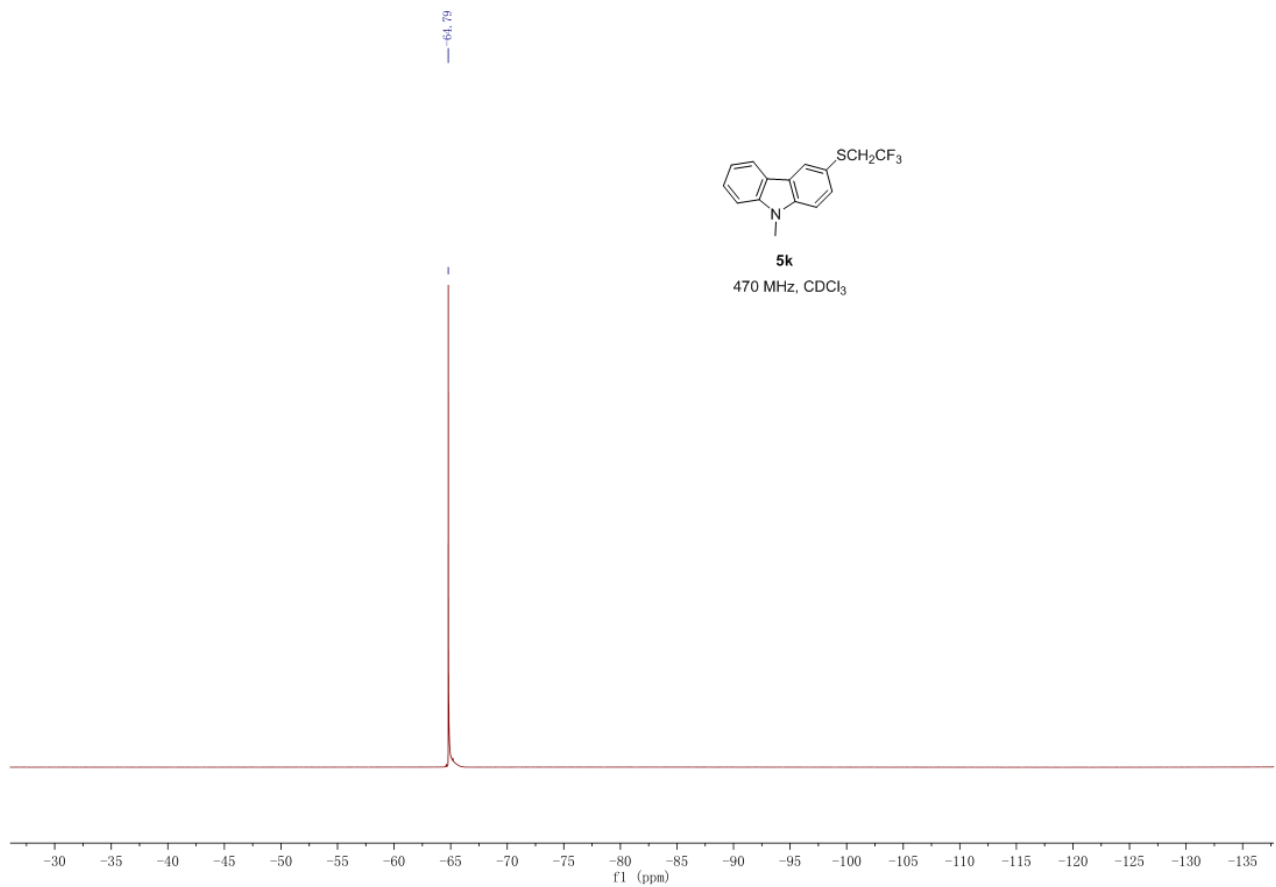

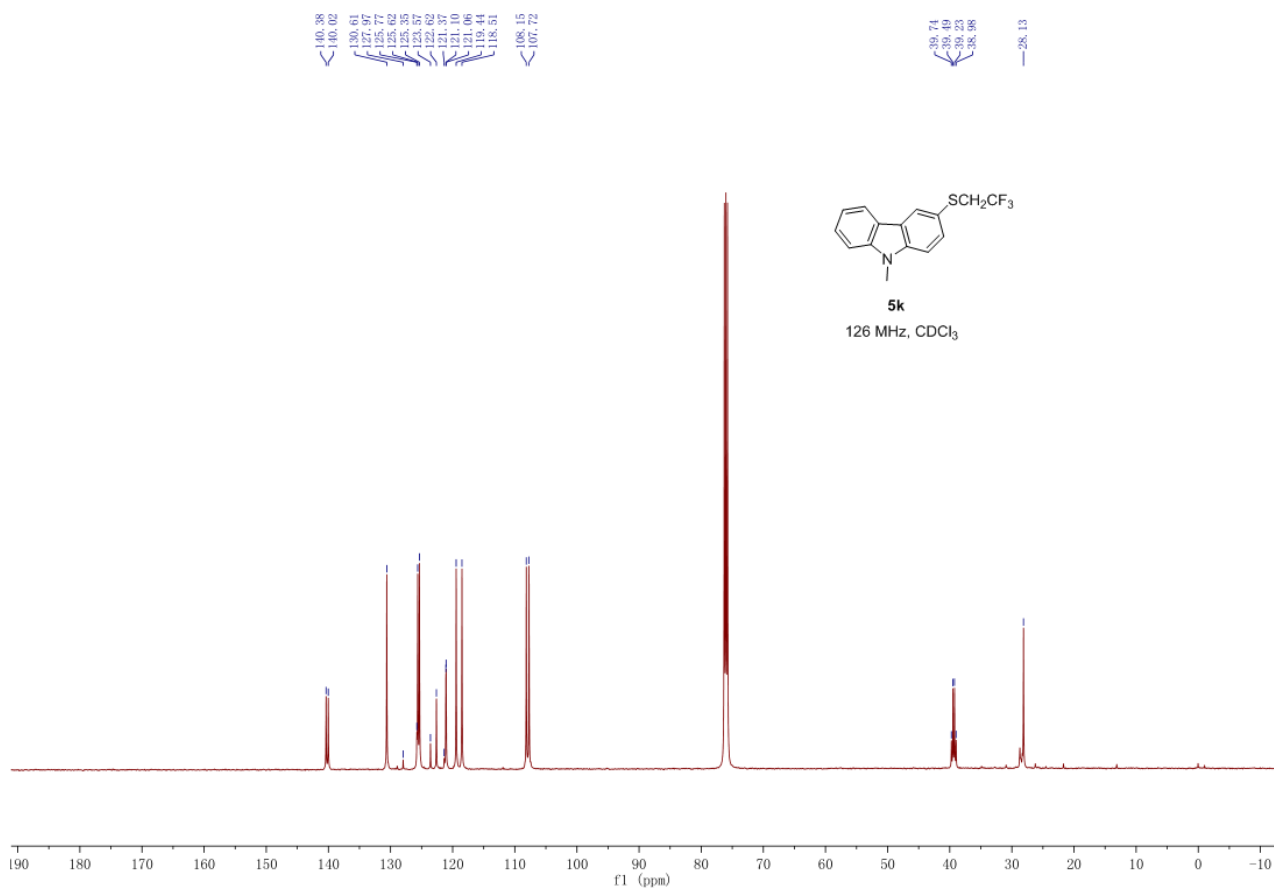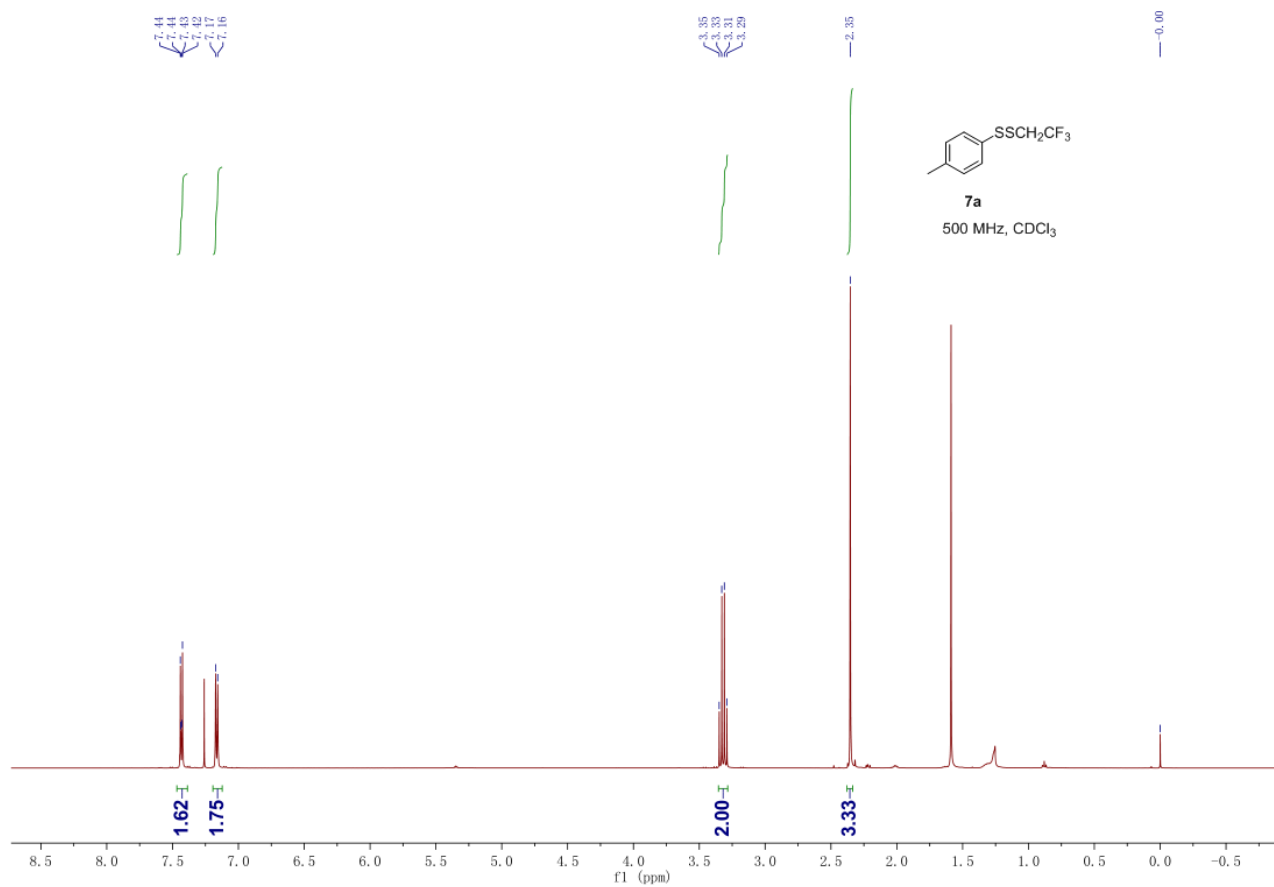

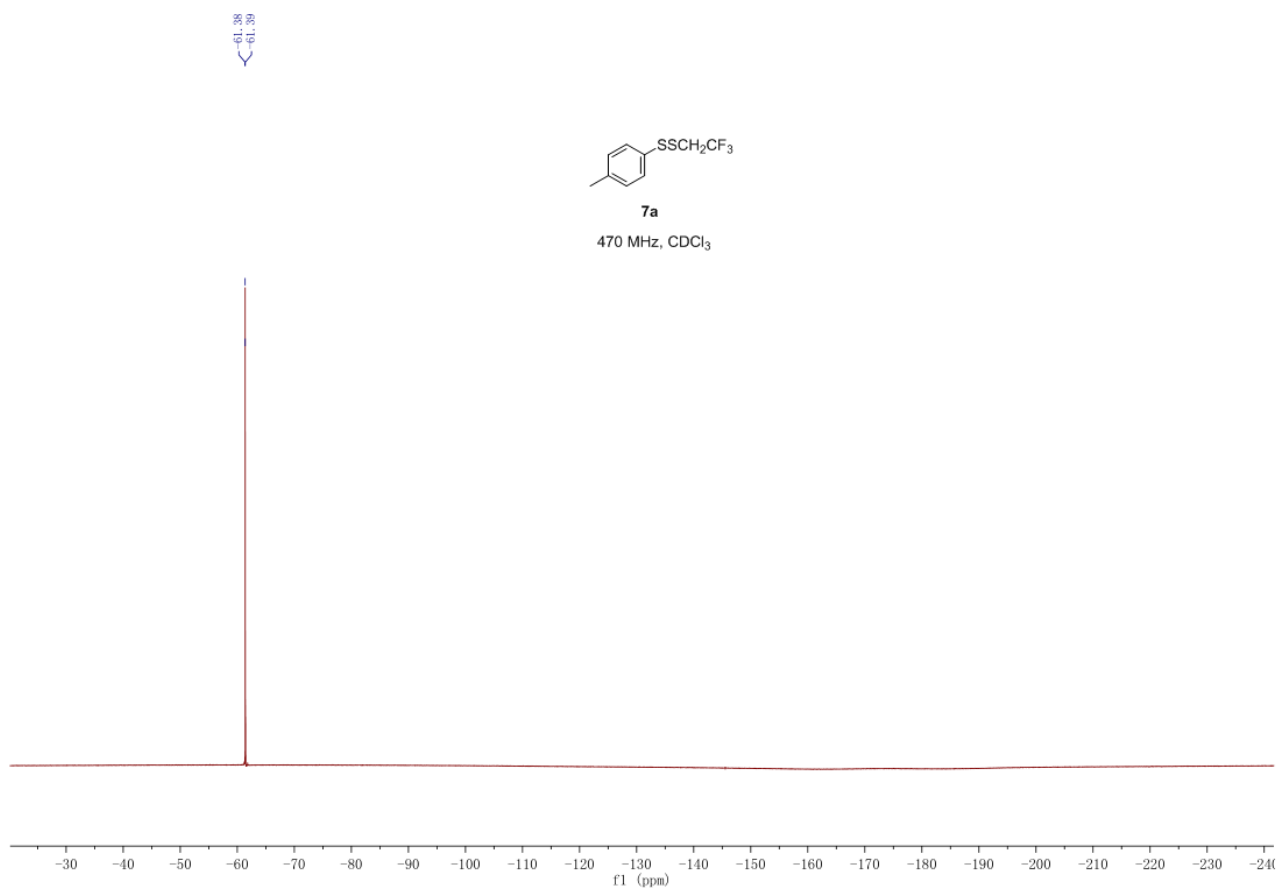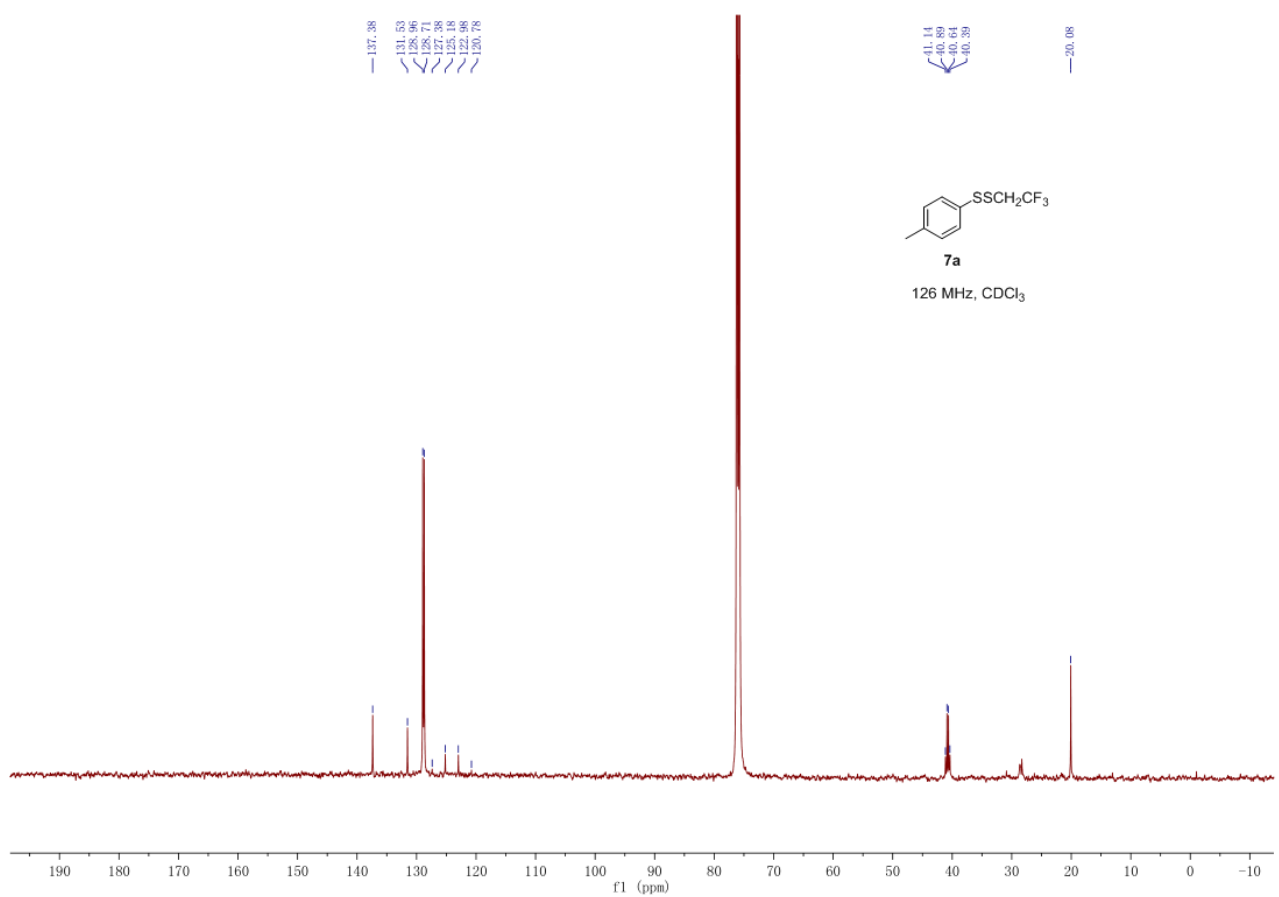



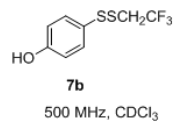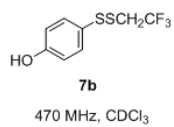

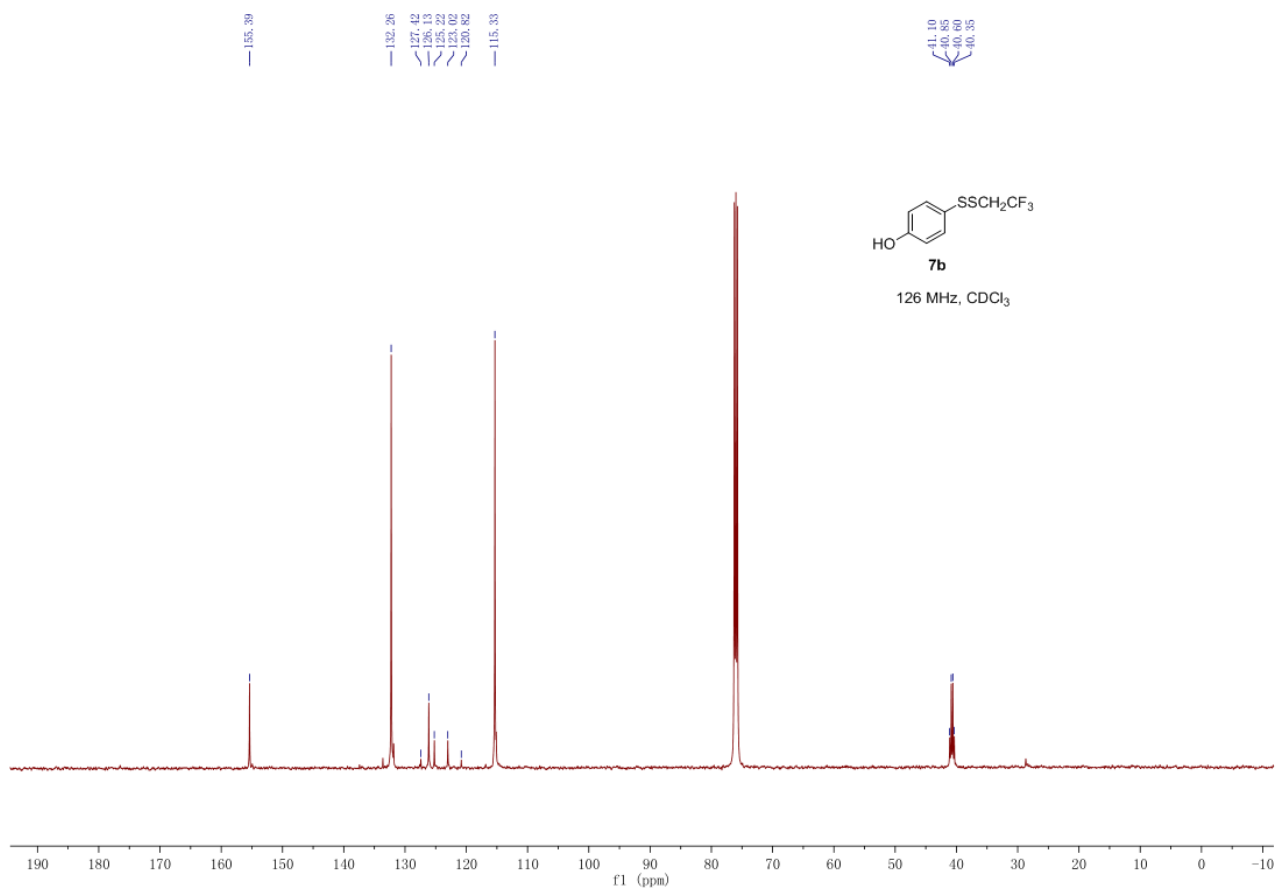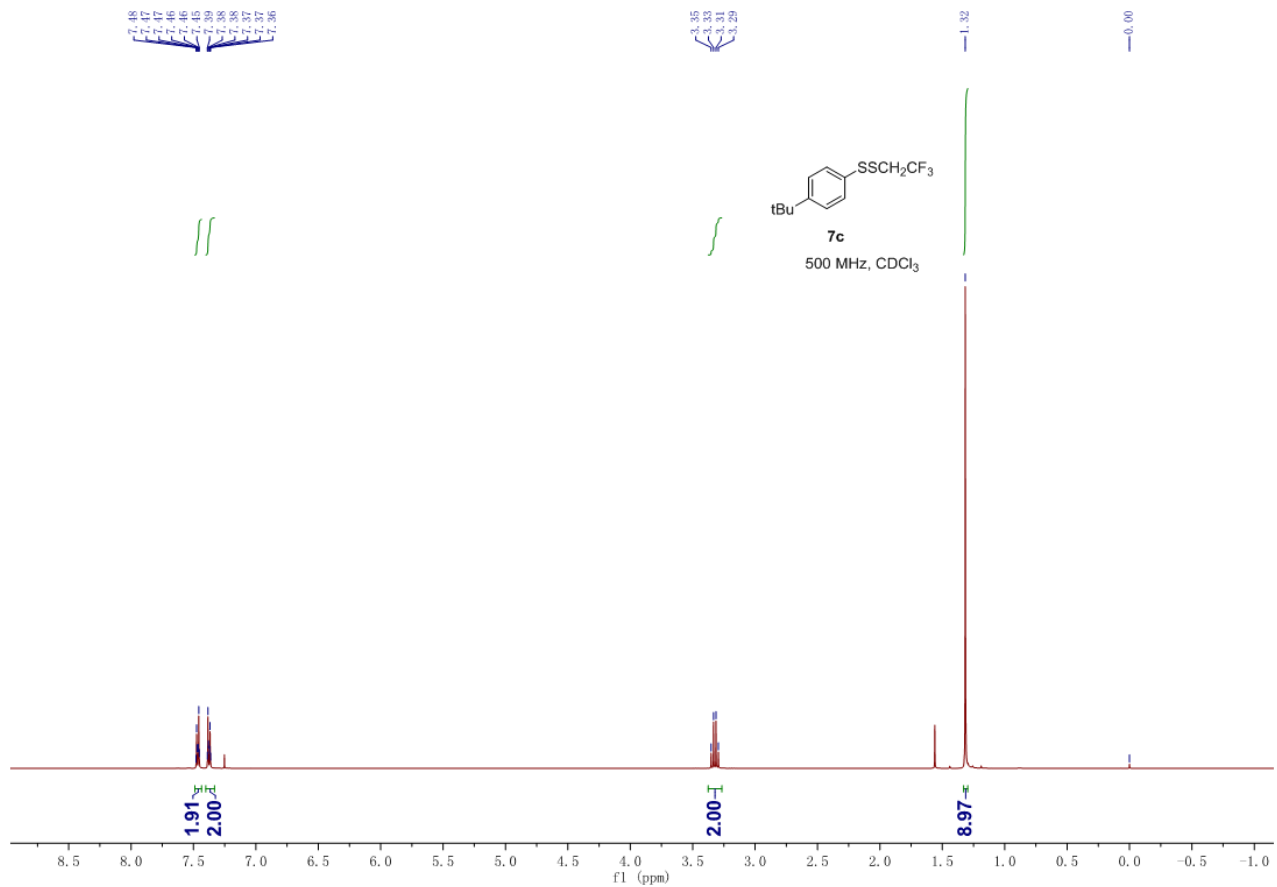

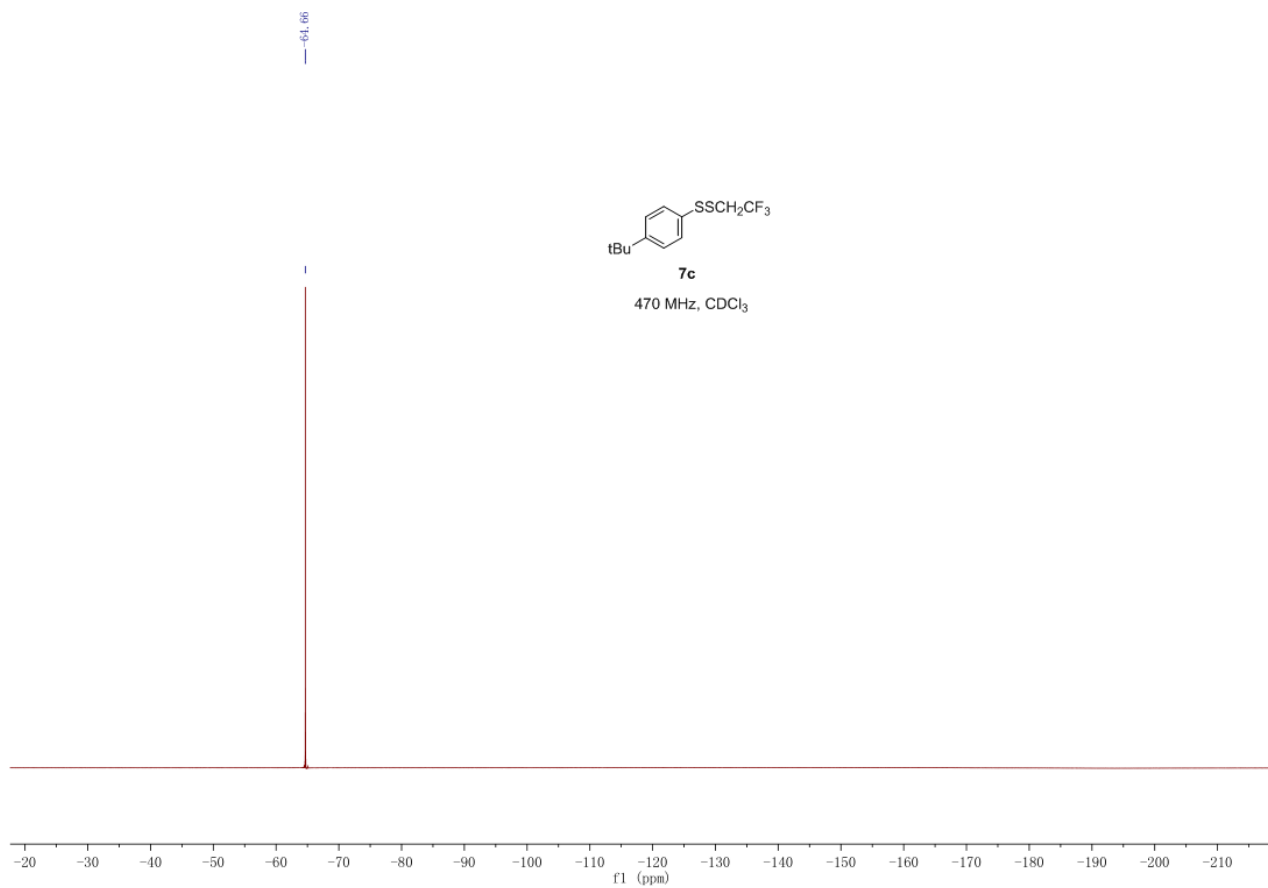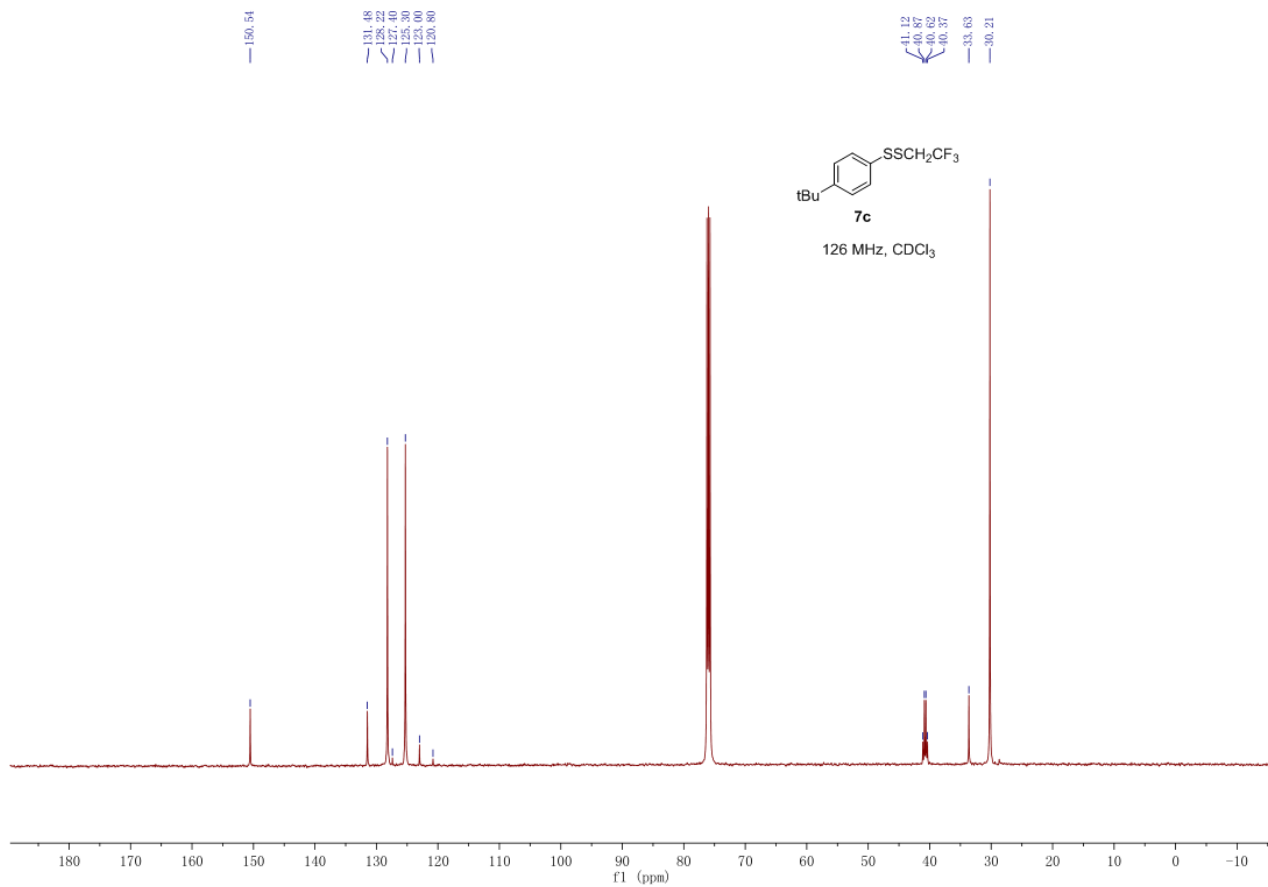

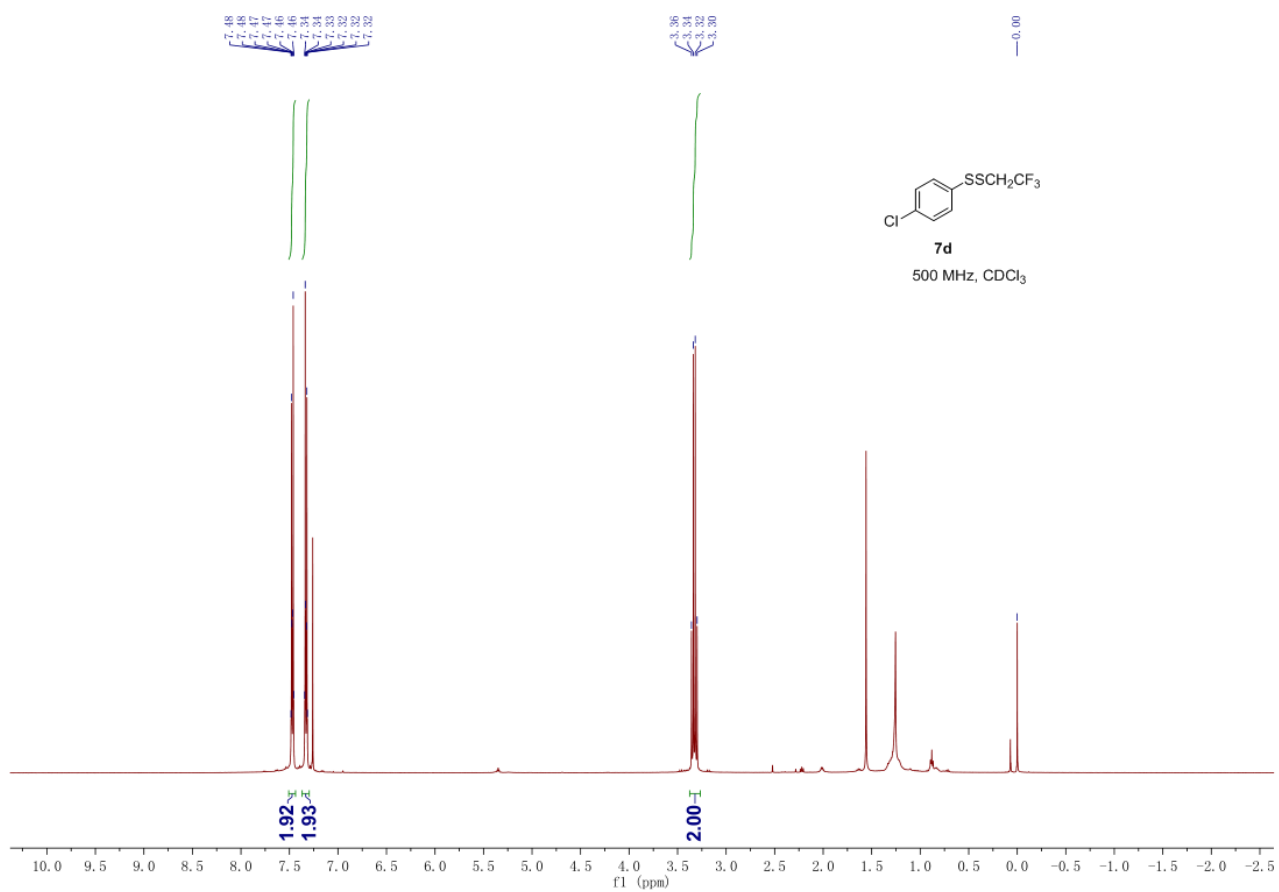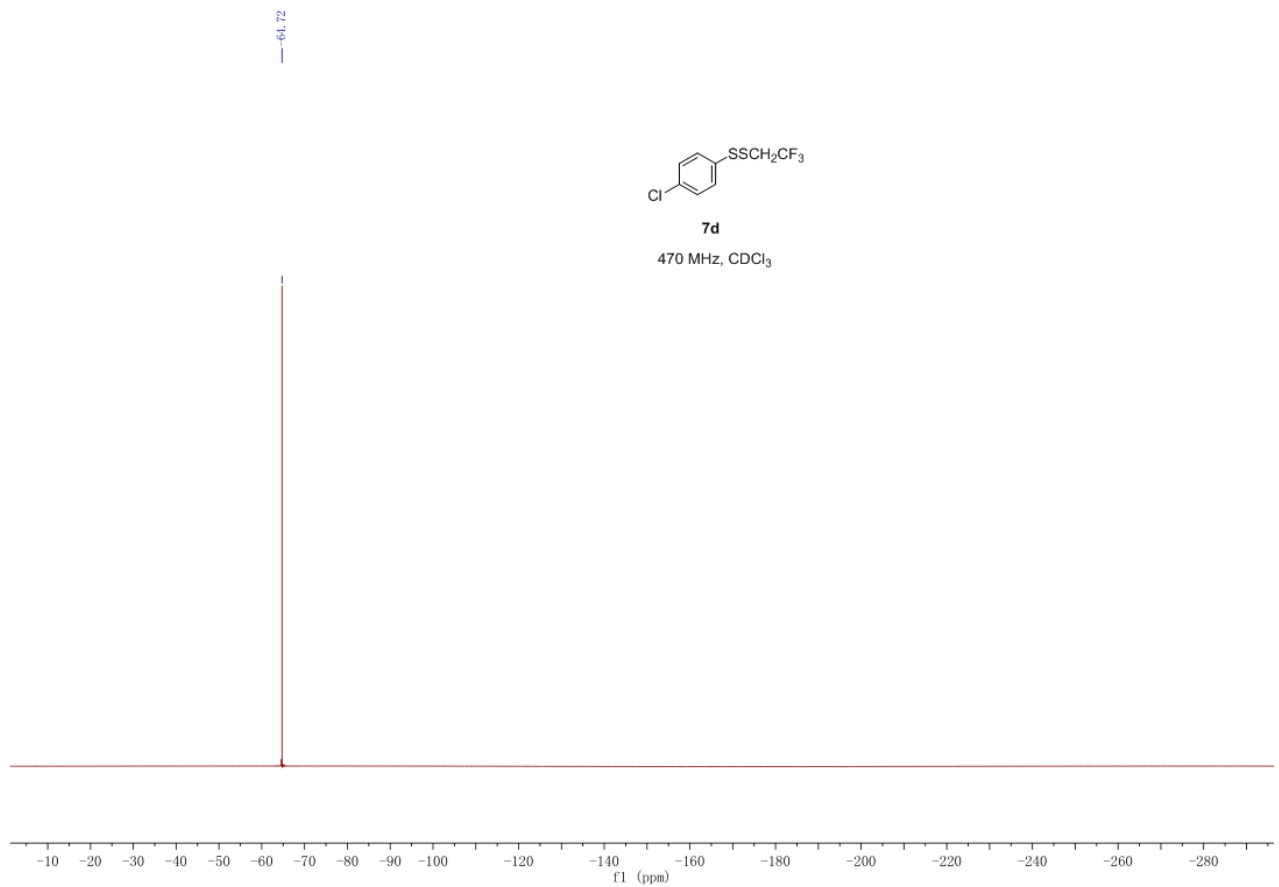

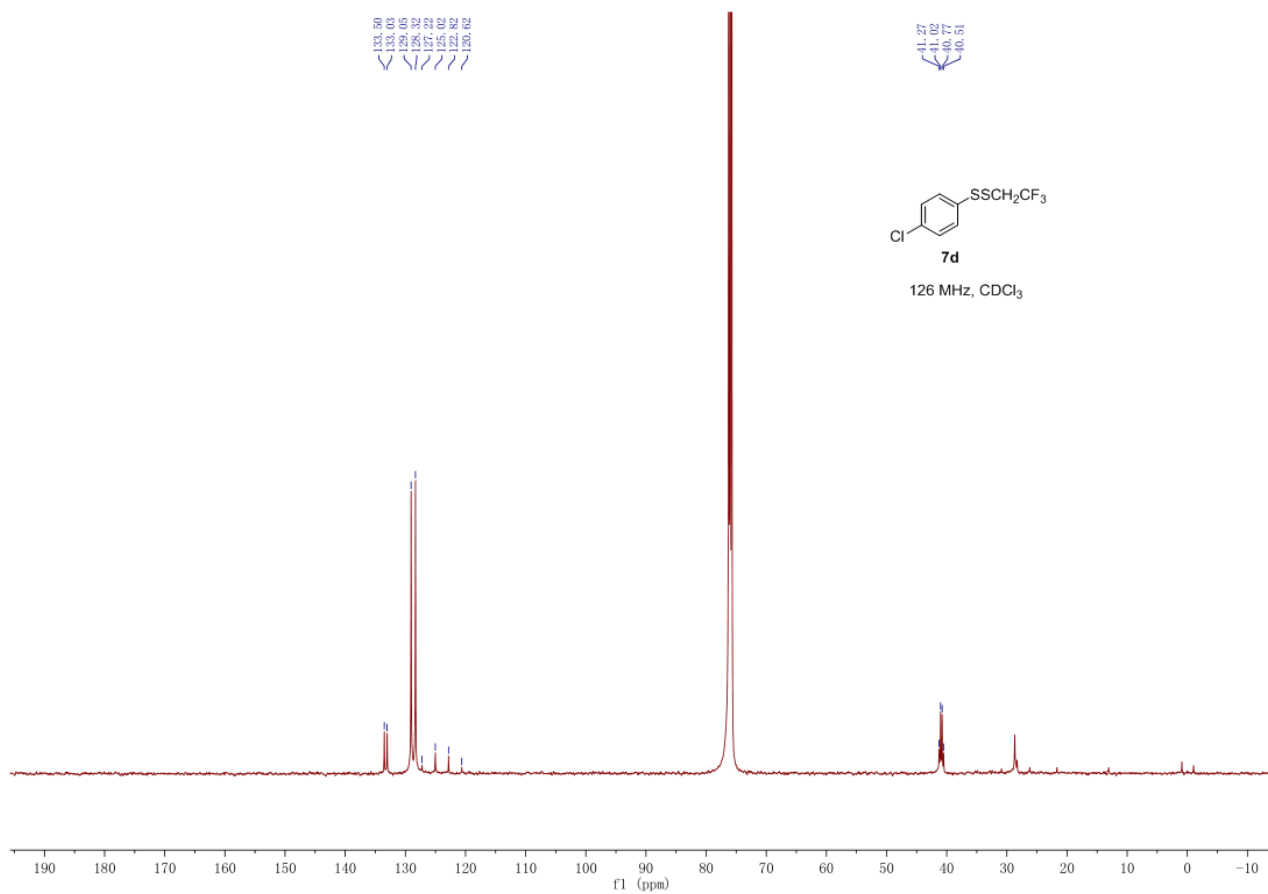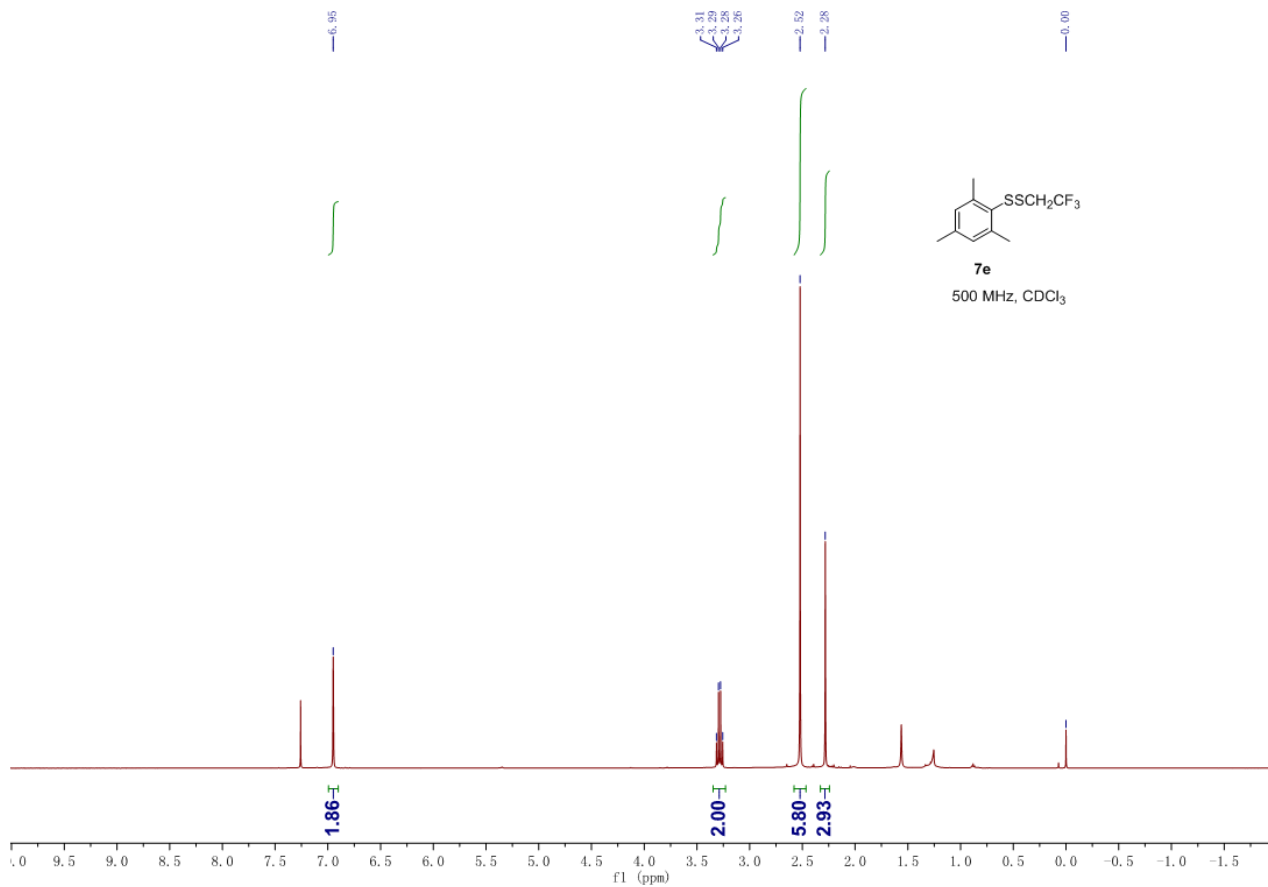

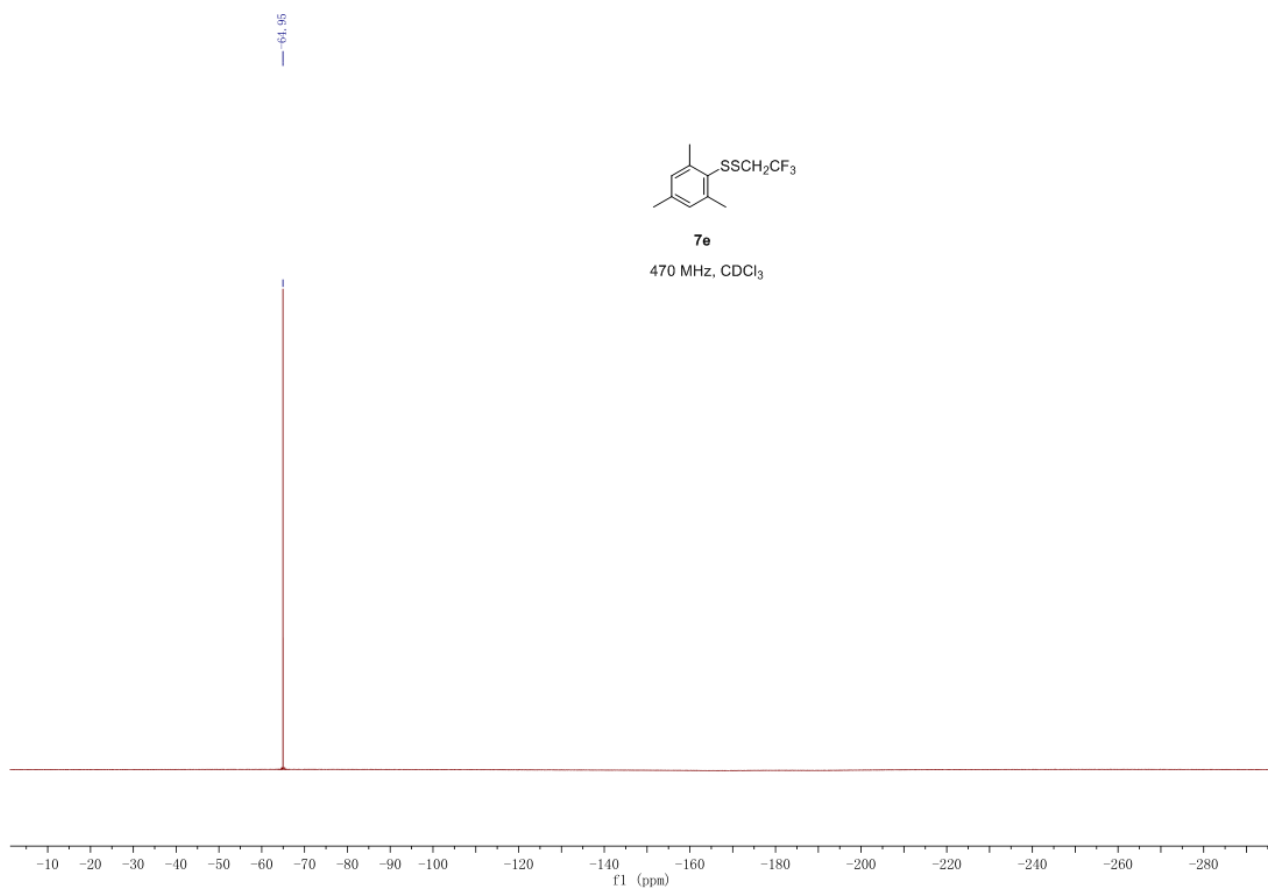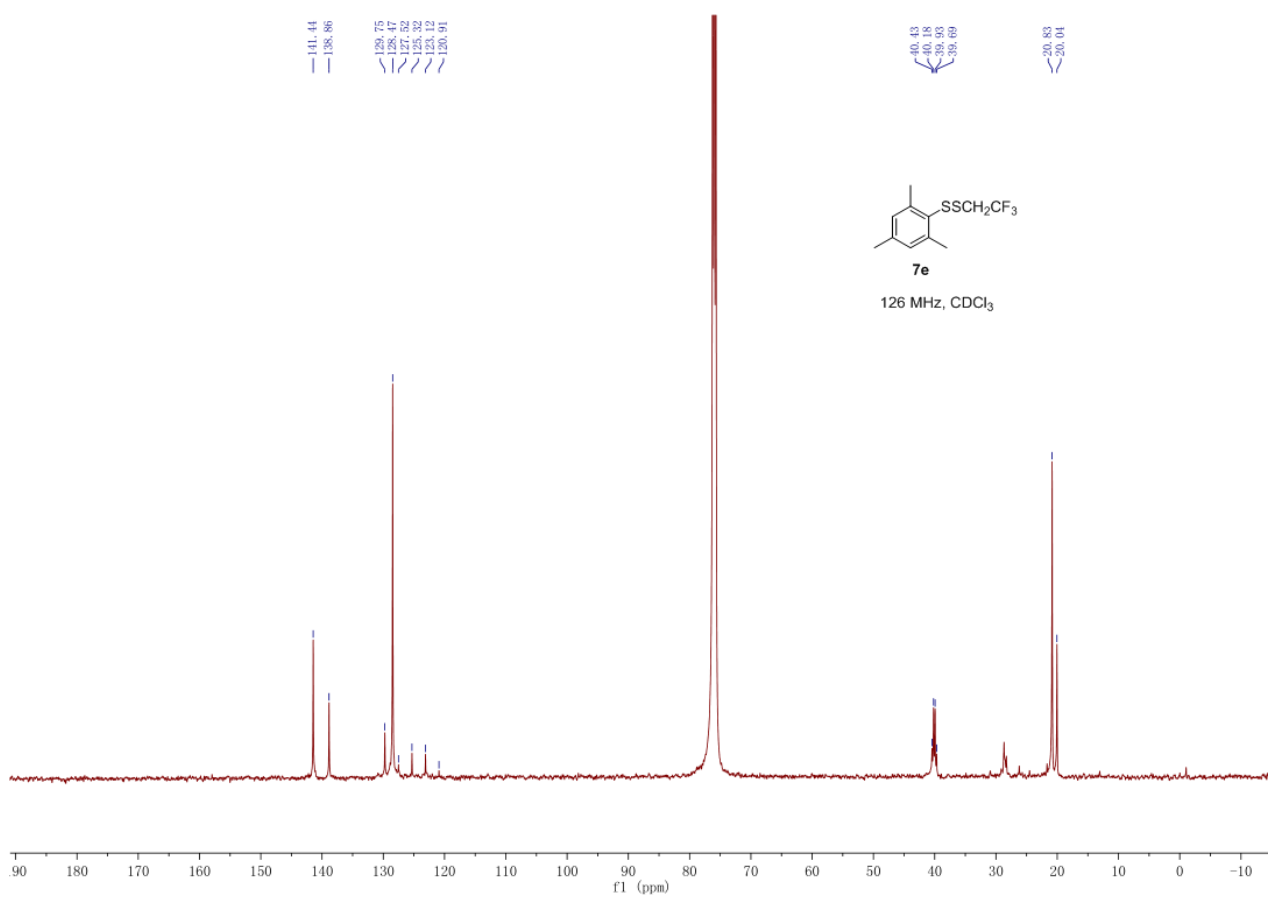

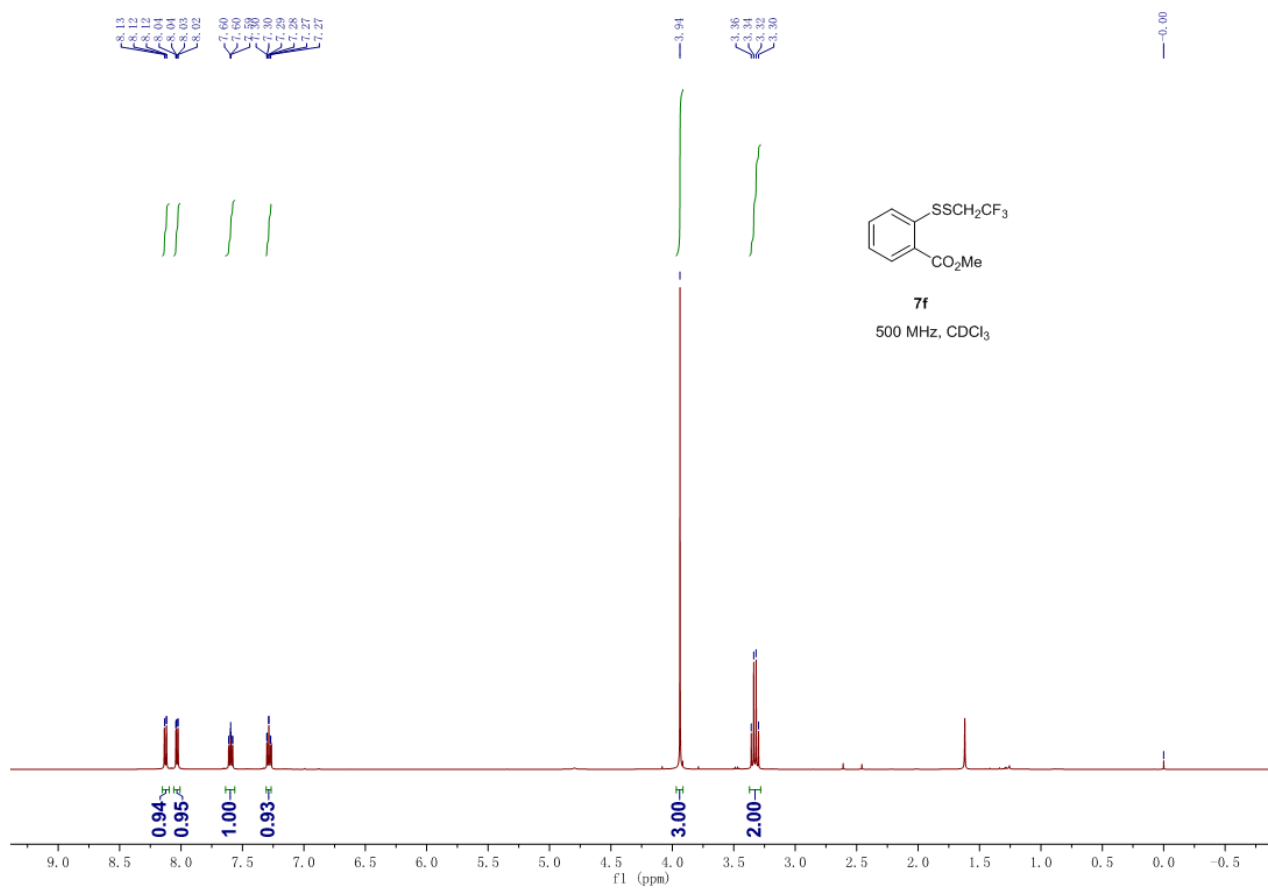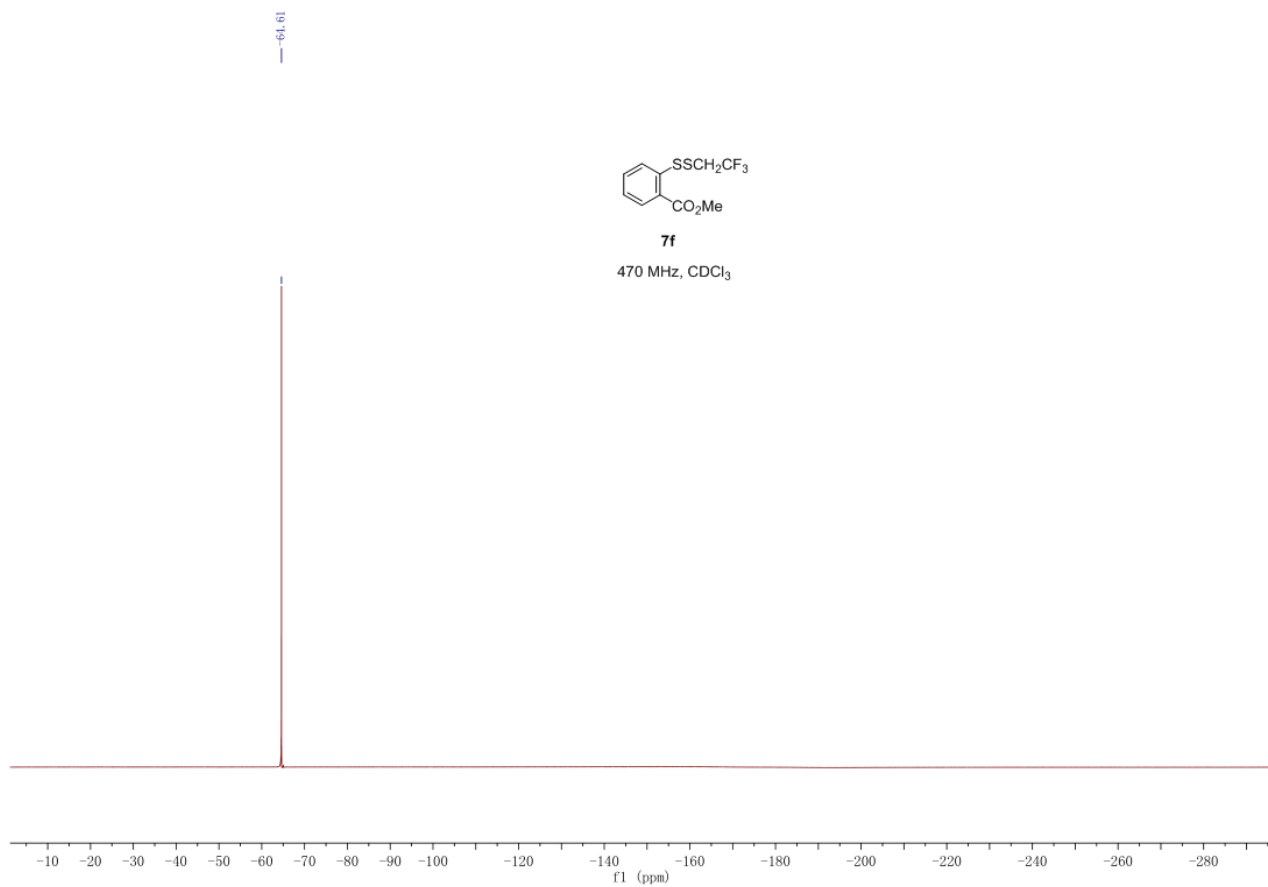

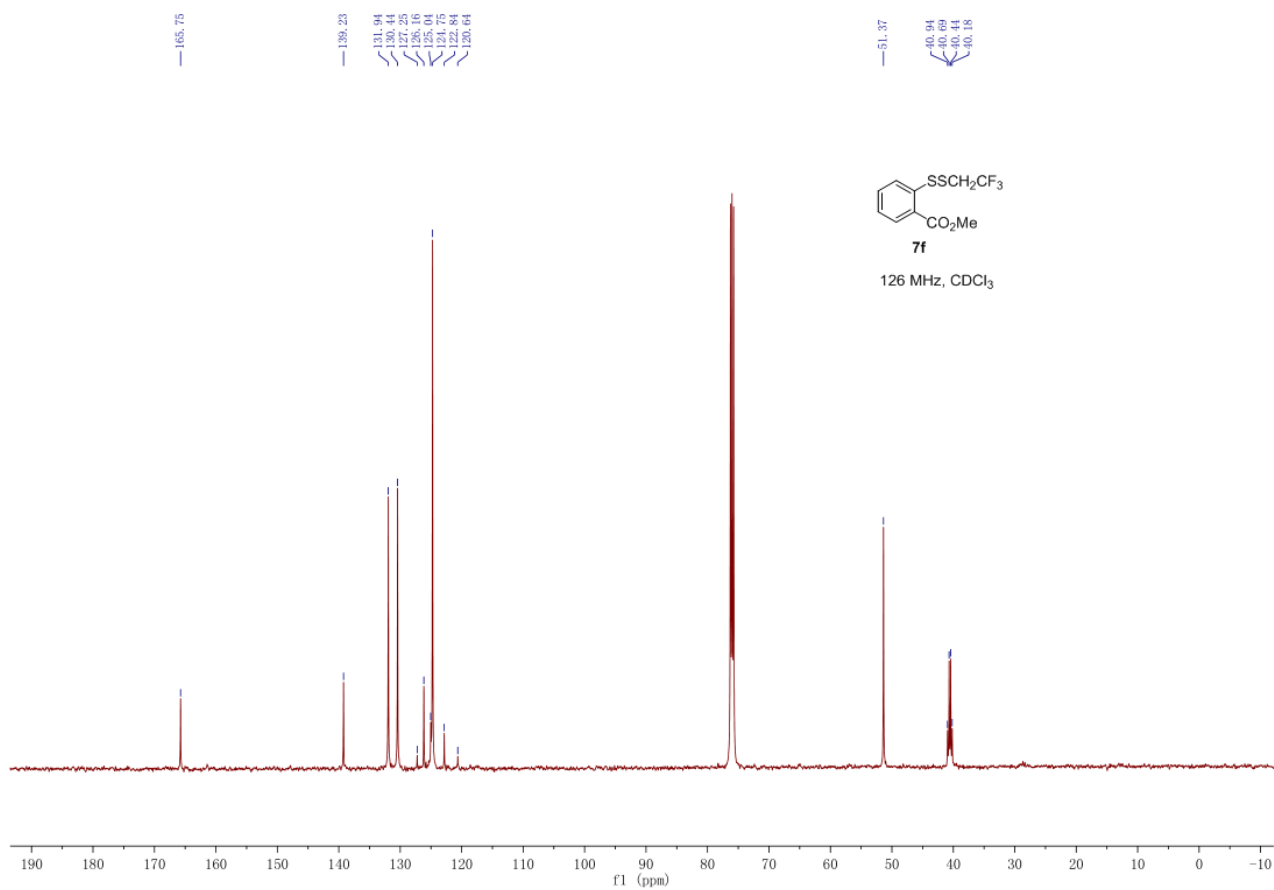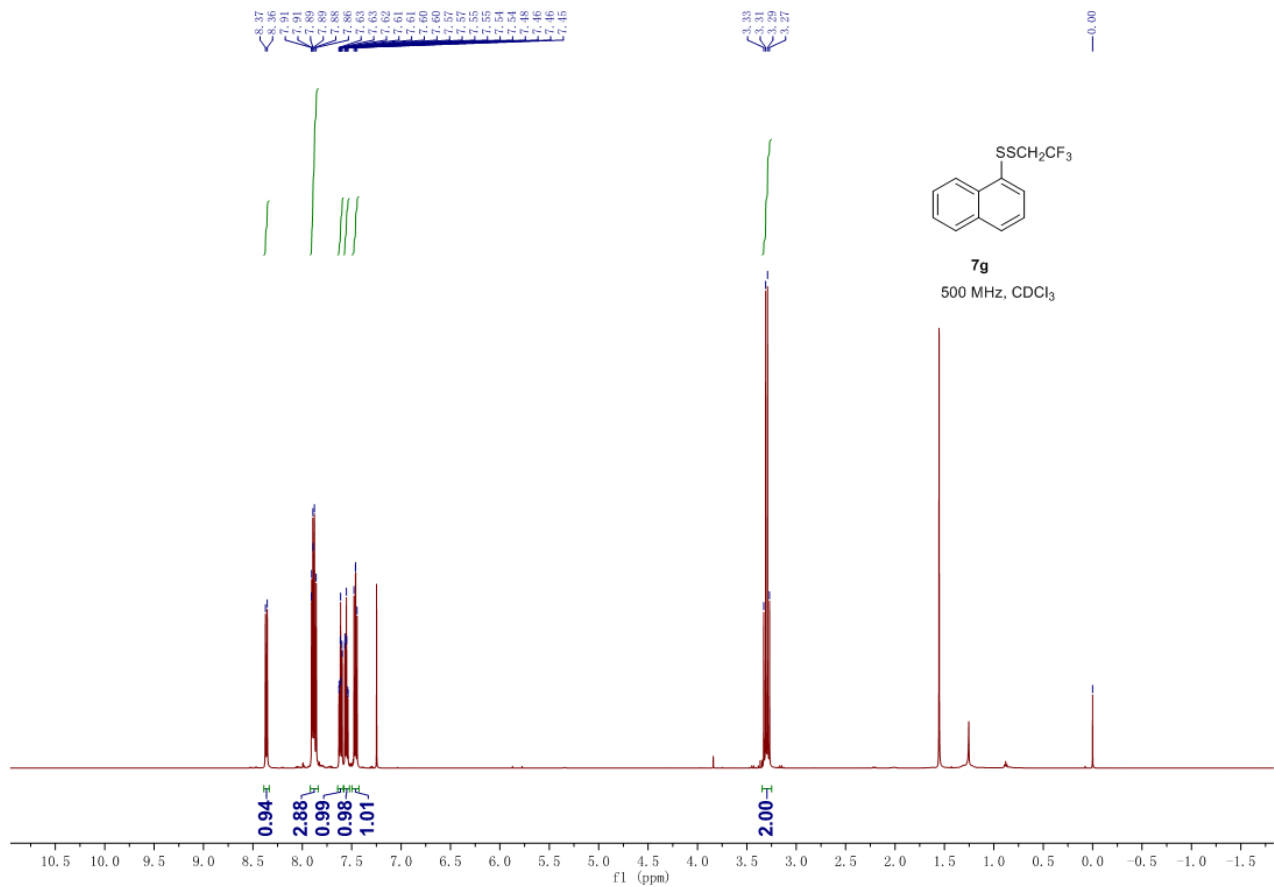



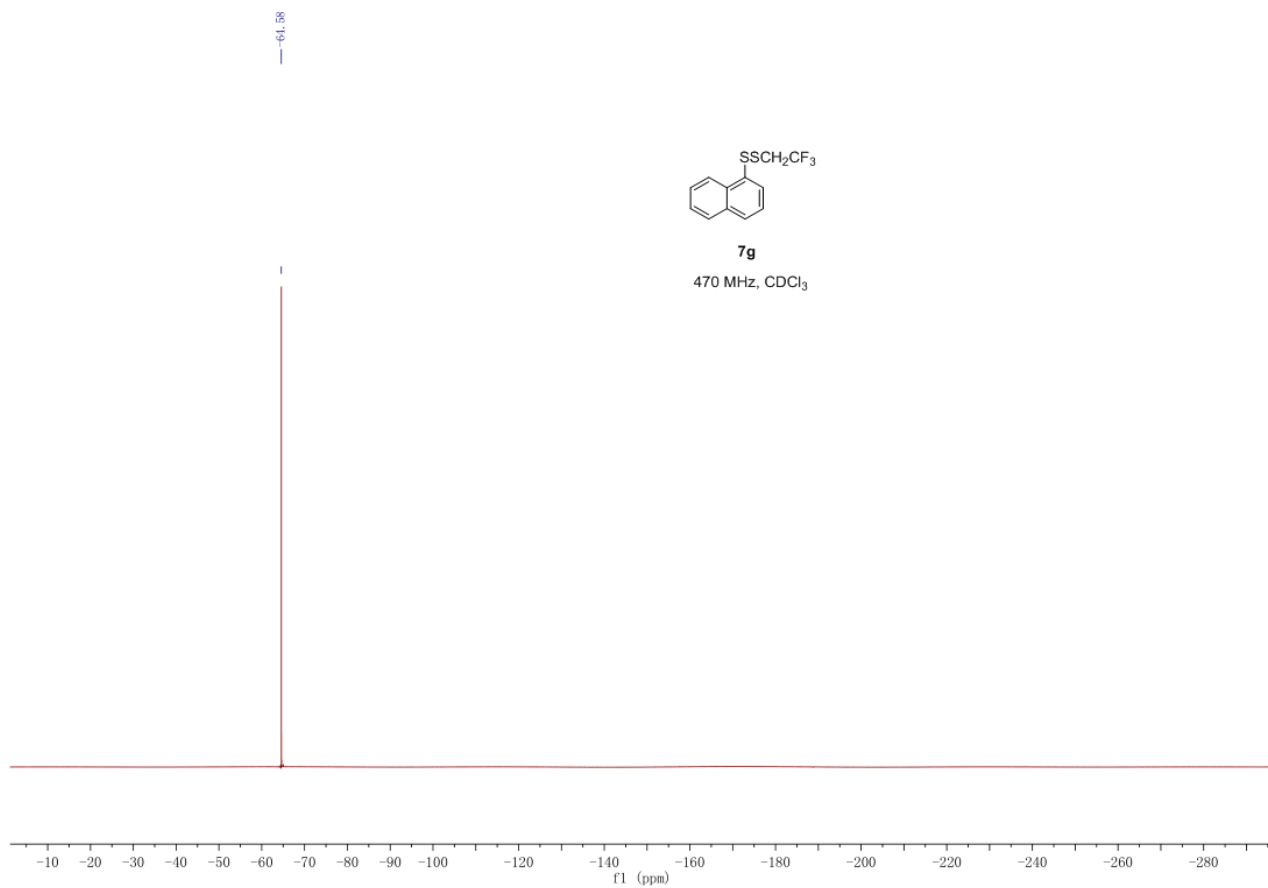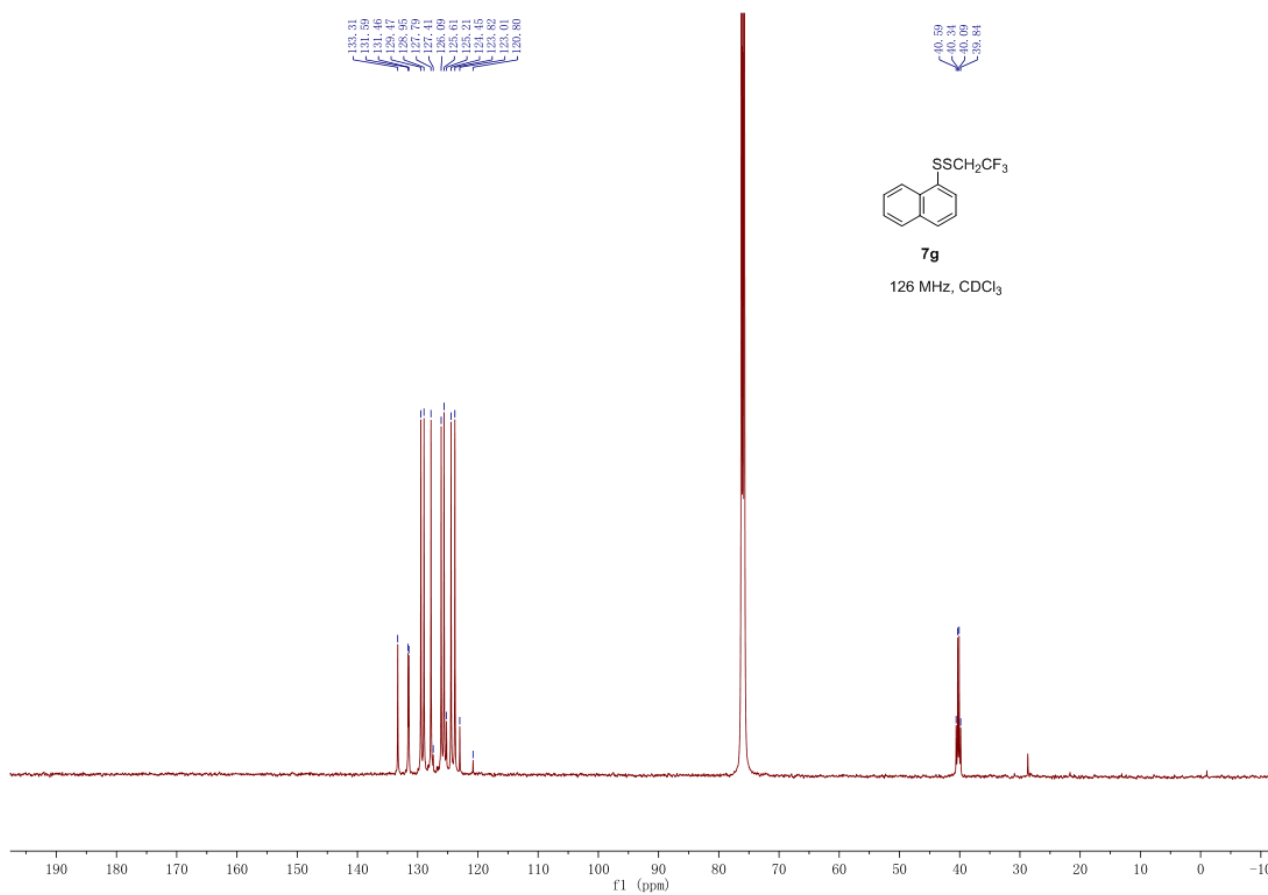

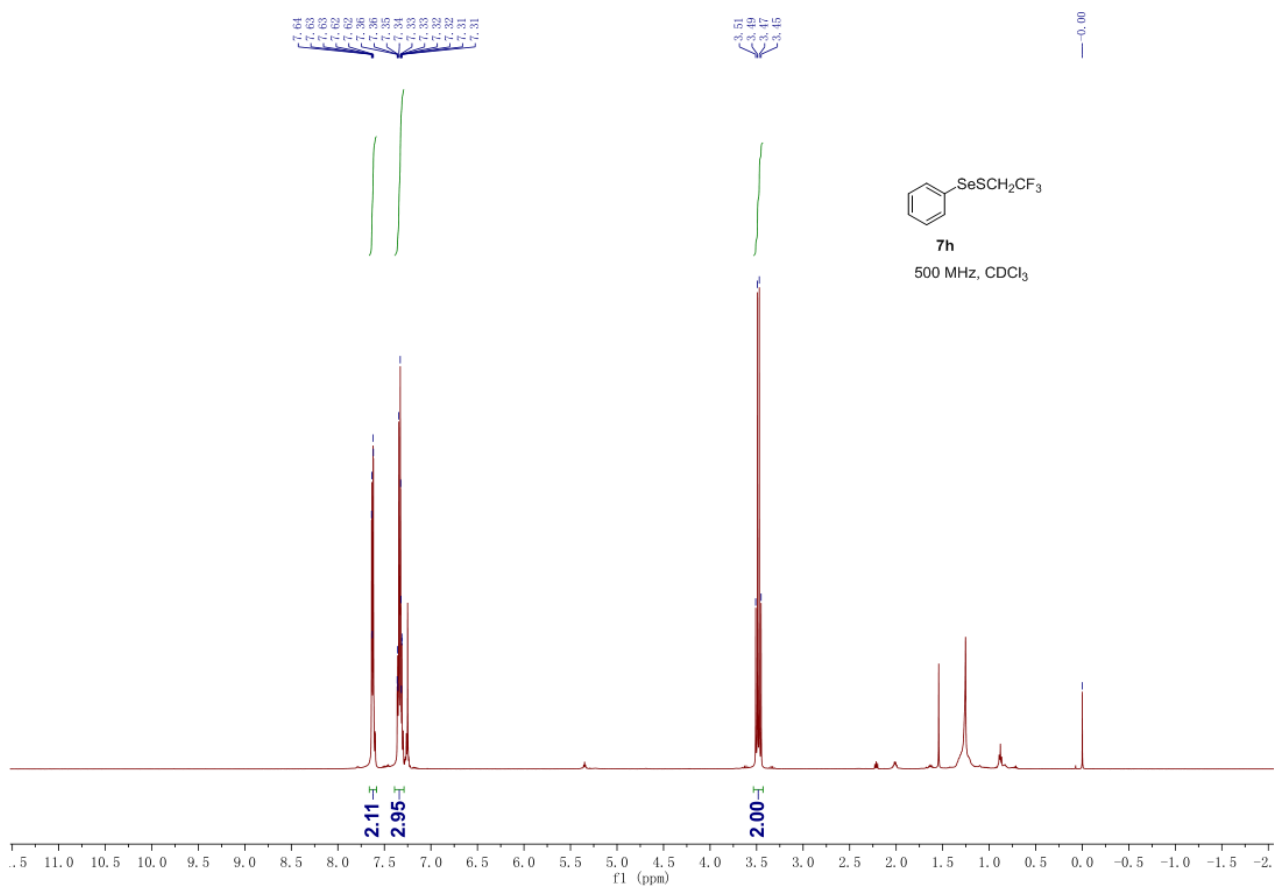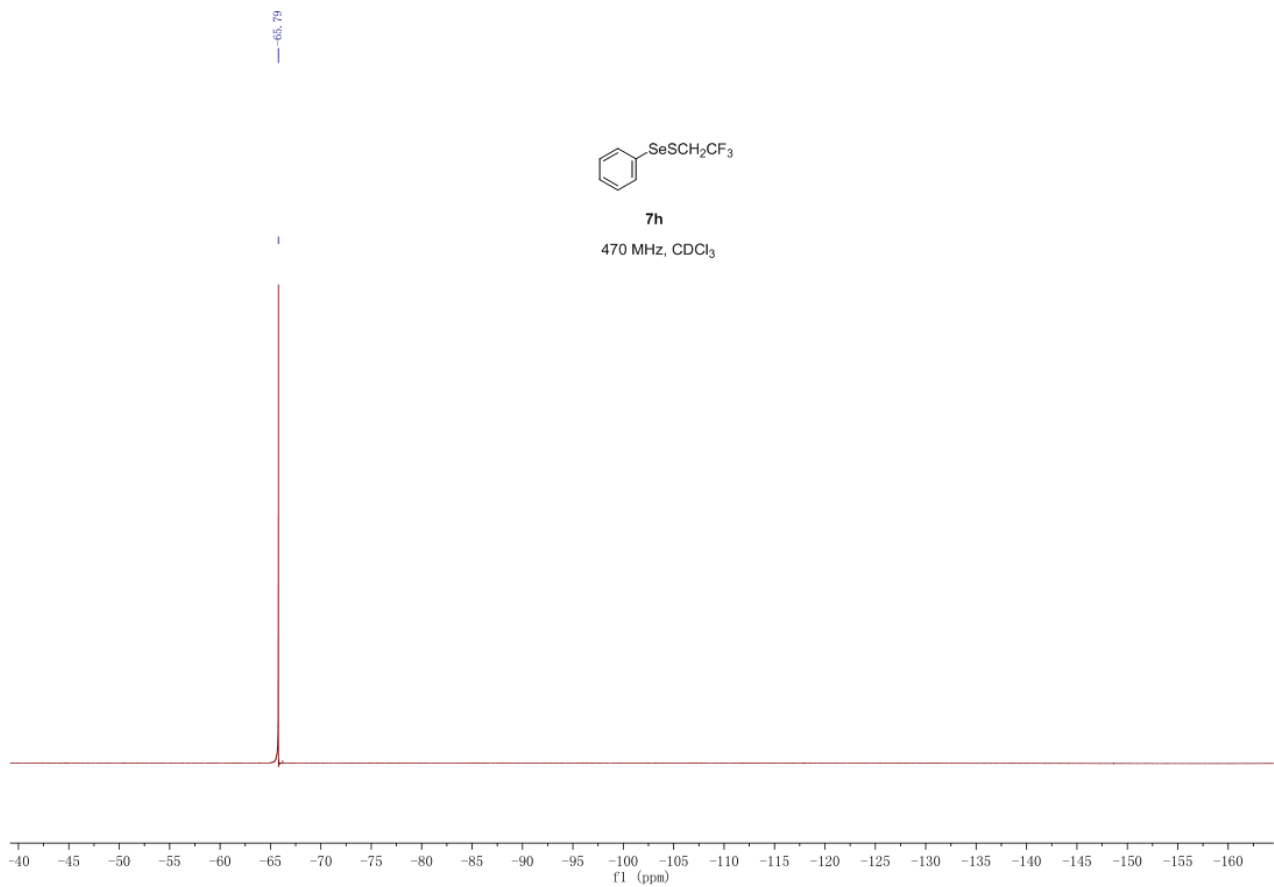

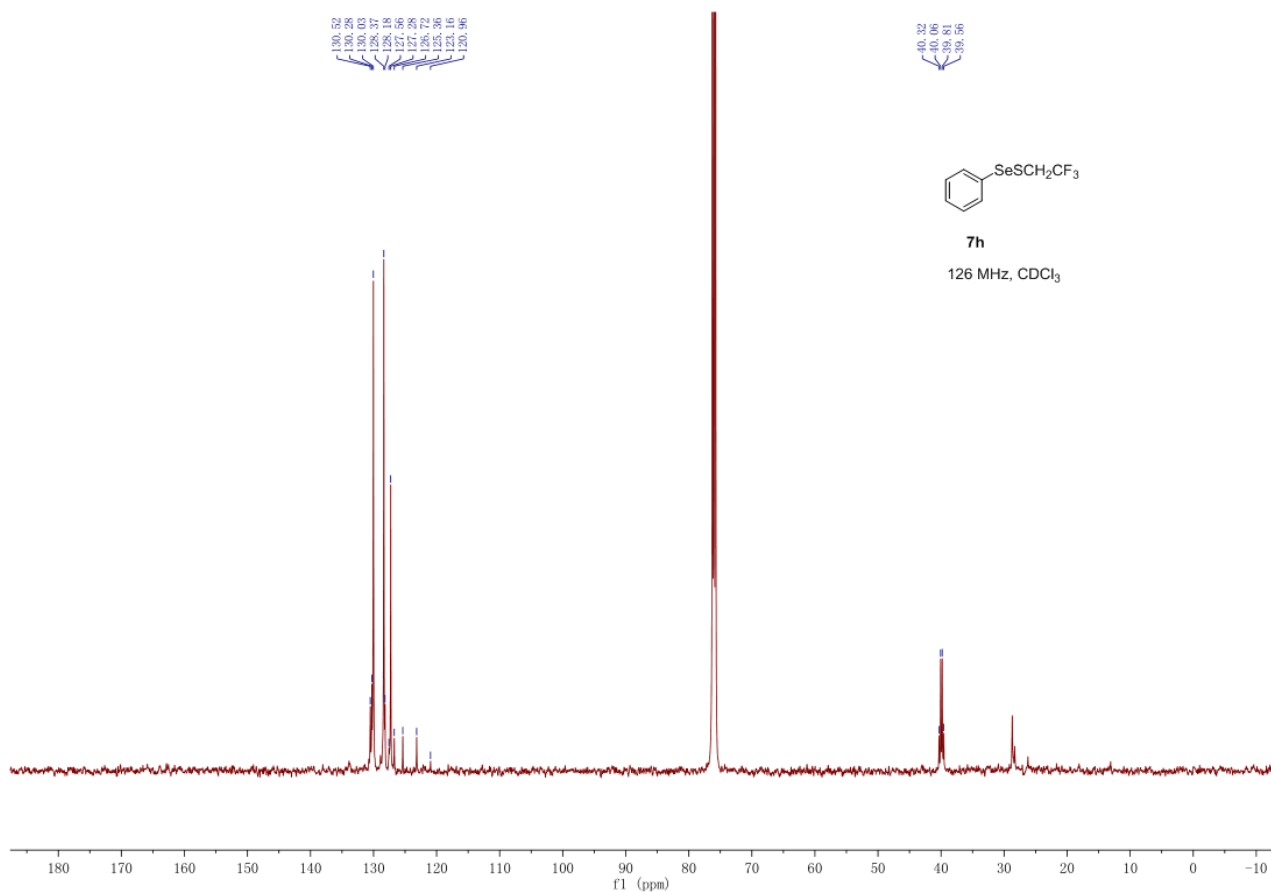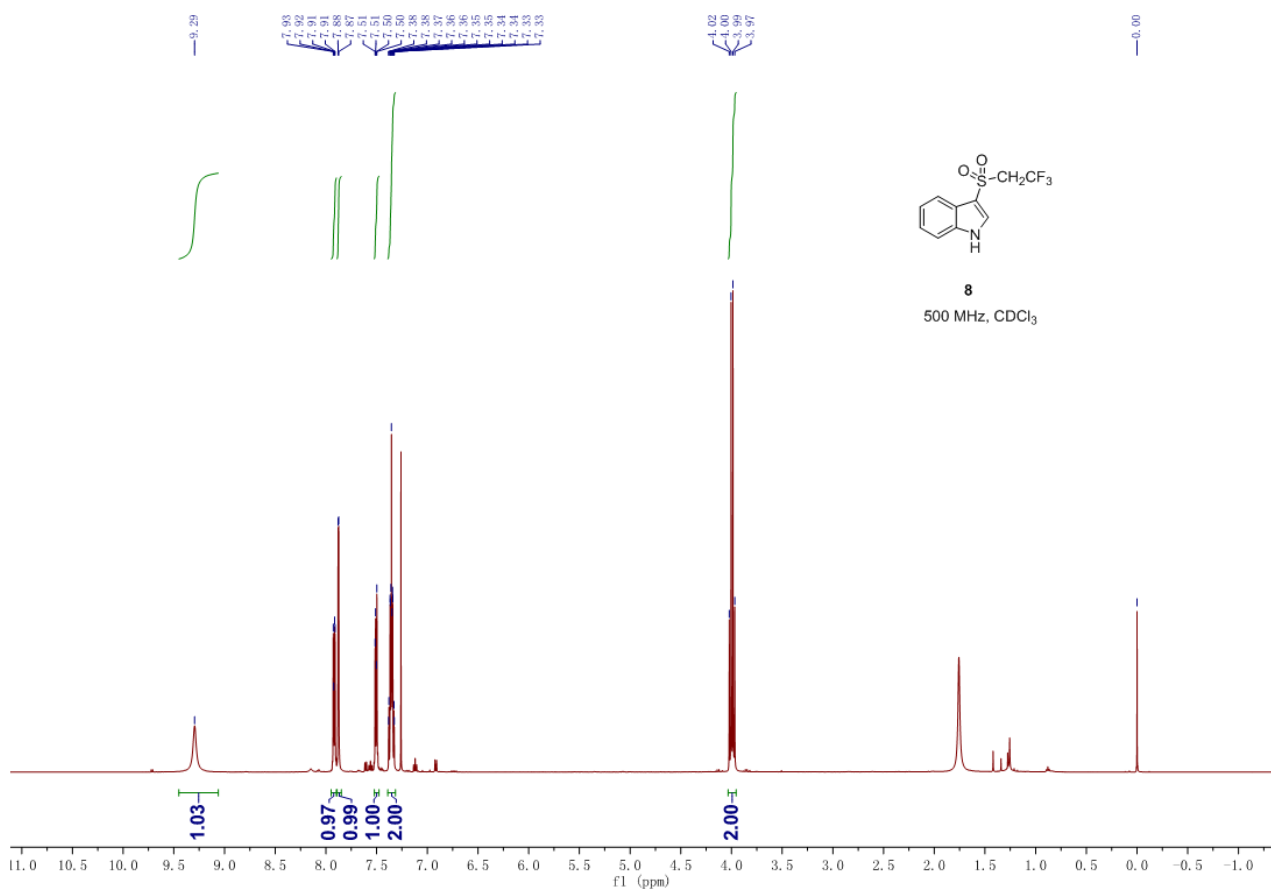

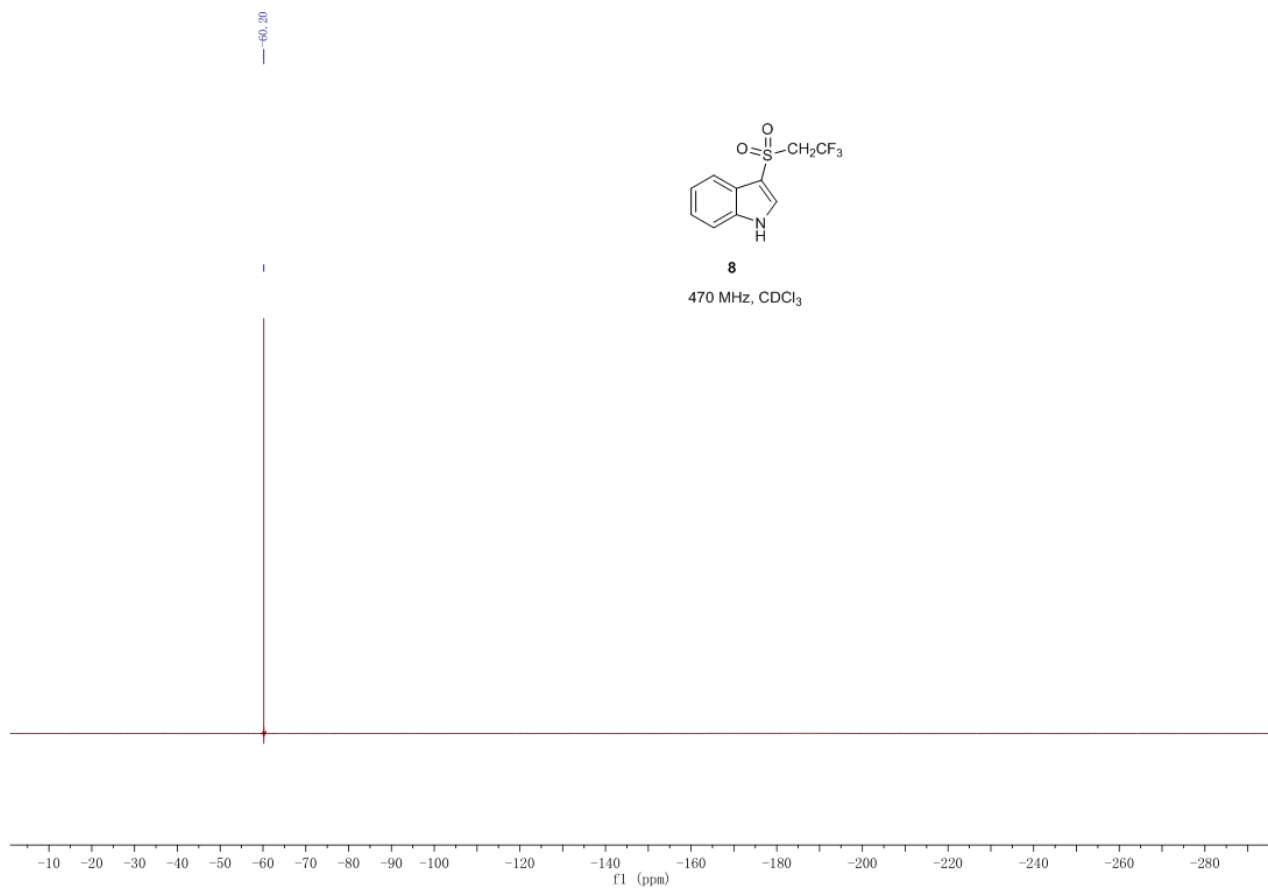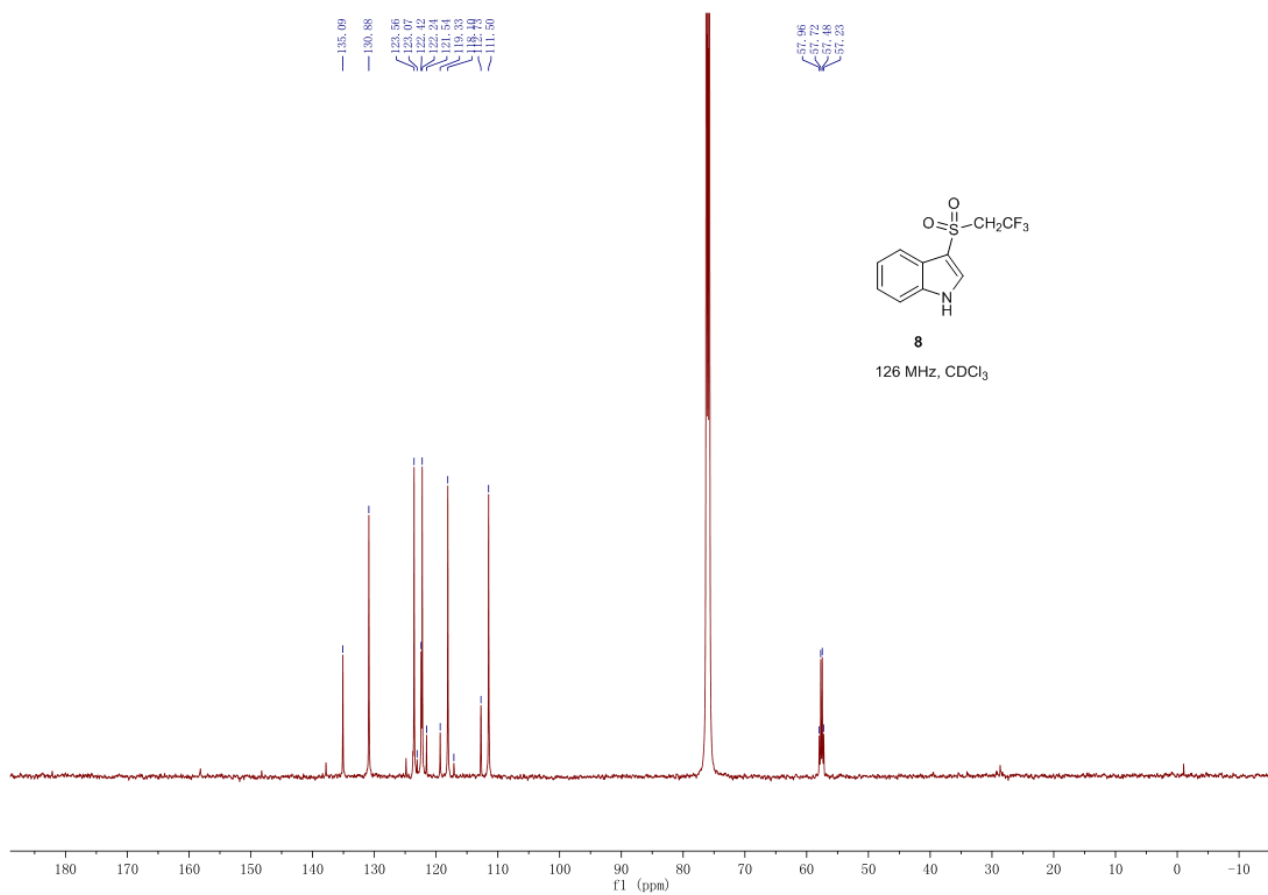



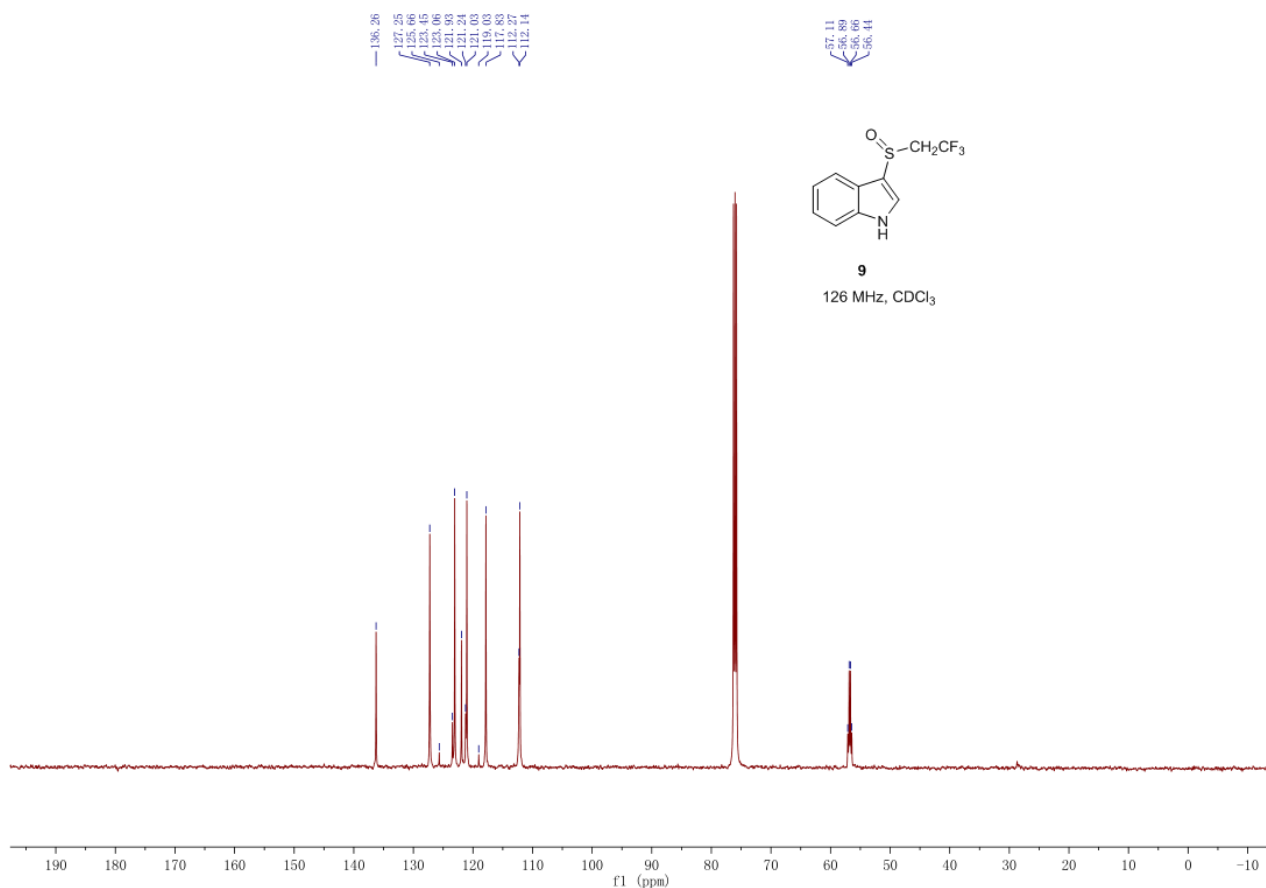

## 2. X-Ray Crystallographic Data of **3o**

Crystallographic data of complexes was collected at 296 K on a Bruker APEX-II CCD system equipped with graphite-monochromated Mo-K $\alpha$  radiation ( $\lambda = 0.071073$  nm) using  $\omega$ - $\phi$  scan technique. Diffraction data were integrated by the SAINT program, which was also used for intensity corrections for Lorentz and polarization effects. Semi-empirical absorption correction was applied using SADABS. The structures were solved by direct methods and all non-hydrogen atoms were refined anisotropically on  $F^2$  by full-matrix least-squares using the SHELXL-97 crystallographic software package. The ellipsoid contour percent probability level is 50%.

X-ray crystal structure of compound **3o** (CCDC # 1577556)

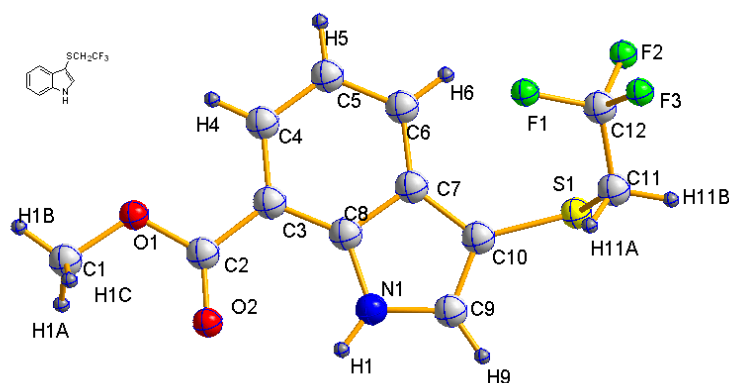

| complex                                             | <b>3o</b>                                                        |
|-----------------------------------------------------|------------------------------------------------------------------|
| Formula                                             | C <sub>12</sub> H <sub>10</sub> F <sub>3</sub> NO <sub>2</sub> S |
| Formula weight                                      | 289.27                                                           |
| Crystal system                                      | Monoclinic                                                       |
| space group                                         | <i>P</i> 2 <sub>1</sub> / <i>n</i>                               |
| <i>a</i> (Å)                                        | 12.5508(18)                                                      |
| <i>b</i> (Å)                                        | 4.7813(7)                                                        |
| <i>c</i> (Å)                                        | 20.425(3)                                                        |
| $\alpha$ (°)                                        | 90                                                               |
| $\beta$ (°)                                         | 103.082(4)                                                       |
| $\gamma$ (°)                                        | 90                                                               |
| Volume(Å <sup>3</sup> )                             | 1193.9(3)                                                        |
| <i>Z</i>                                            | 4                                                                |
| <i>T</i> (K)                                        | 153(2)                                                           |
| <i>D</i> <sub>calcd</sub> (g/m <sup>3</sup> )       | 1.609                                                            |
| <i>F</i> (000)                                      | 592                                                              |
| Reflections collected                               | 2097                                                             |
| Unique reflections                                  | 1725                                                             |
| Goof                                                | 1.007                                                            |
| <i>R</i> <sub>1</sub> [ <i>I</i> > 2σ( <i>I</i> )]  | 0.0346                                                           |
| <i>wR</i> <sub>2</sub> [ <i>I</i> > 2σ( <i>I</i> )] | 0.0824 <sup>a</sup>                                              |
| CCDC NO.                                            | 1577556                                                          |
